# Supplementary material for: Use of a targeted, computer/web-based guided self-help psychoeducation toolkit for distressing hallucinations (MUSE) in people with an at-risk mental state for psychosis: protocol for a randomised controlled feasibility trial
Source: PubMed Central journal article supplement (PMC10314705; doi:10.1136/bmjopen-2023-076101), 2023-06-30
Supplement: bmjopen-2023-076101.draft_revisions.pdf [file bmjopen-2023-076101.draft_revisions.pdf]

# BMJ Open

BMJ Open is committed to open peer review. As part of this commitment we make the peer review history of every article we publish publicly available.

When an article is published we post the peer reviewers' comments and the authors' responses online. We also post the versions of the paper that were used during peer review. These are the versions that the peer review comments apply to.

The versions of the paper that follow are the versions that were submitted during the peer review process. They are not the versions of record or the final published versions. They should not be cited or distributed as the published version of this manuscript.

BMJ Open is an open access journal and the full, final, typeset and author-corrected version of record of the manuscript is available on our site with no access controls, subscription charges or pay-per-view fees (<http://bmjopen.bmj.com>).

If you have any questions on BMJ Open's open peer review process please email [info.bmjopen@bmj.com](mailto:info.bmjopen@bmj.com)

# BMJ Open

**A targeted, computer/web based guided self-help psychoeducation toolkit for distressing hallucinations (MUSE) in people with an At Risk Mental State (ARMS) for psychosis: a study protocol for a randomised controlled feasibility trial.**

|                               |                                                                                                                                                                                                                                                                                                                                                                                                                                                                                                                                                                                                                                                                                                                                                                                                                                                                                                                                                                                                                                                                              |
|-------------------------------|------------------------------------------------------------------------------------------------------------------------------------------------------------------------------------------------------------------------------------------------------------------------------------------------------------------------------------------------------------------------------------------------------------------------------------------------------------------------------------------------------------------------------------------------------------------------------------------------------------------------------------------------------------------------------------------------------------------------------------------------------------------------------------------------------------------------------------------------------------------------------------------------------------------------------------------------------------------------------------------------------------------------------------------------------------------------------|
| Journal:                      | <i>BMJ Open</i>                                                                                                                                                                                                                                                                                                                                                                                                                                                                                                                                                                                                                                                                                                                                                                                                                                                                                                                                                                                                                                                              |
| Manuscript ID                 | bmjopen-2023-076101                                                                                                                                                                                                                                                                                                                                                                                                                                                                                                                                                                                                                                                                                                                                                                                                                                                                                                                                                                                                                                                          |
| Article Type:                 | Protocol                                                                                                                                                                                                                                                                                                                                                                                                                                                                                                                                                                                                                                                                                                                                                                                                                                                                                                                                                                                                                                                                     |
| Date Submitted by the Author: | 28-May-2023                                                                                                                                                                                                                                                                                                                                                                                                                                                                                                                                                                                                                                                                                                                                                                                                                                                                                                                                                                                                                                                                  |
| Complete List of Authors:     | Hamilton, Jahnese; Cumbria Northumberland Tyne and Wear NHS Foundation Trust, Research and Development; Newcastle University<br>Arnott, Bronia; Newcastle University, Population Health Sciences Institute<br>Aynsworth, Charlotte; Cumbria Northumberland Tyne and Wear NHS Foundation Trust<br>Barclay, Nicola; Cumbria Northumberland Tyne and Wear NHS Foundation Trust<br>Birkett, Lauren; Cumbria Northumberland Tyne and Wear NHS Foundation Trust<br>Brandon, Toby; Northumbria University<br>Dixon, Lyndsey; Cumbria Northumberland Tyne and Wear NHS Foundation Trust<br>Dudley, Robert; University of York; Cumbria Northumberland Tyne and Wear NHS Foundation Trust<br>Einbeck, J; Durham University<br>Gibbs, Christopher; Cumbria Northumberland Tyne and Wear NHS Foundation Trust<br>Kharatikoopaei, Ehsan; Manchester Metropolitan University; Durham University<br>Simpson, Jennifer; Tees Esk and Wear Valleys NHS Foundation Trust<br>Dodgson, Guy; Cumbria Northumberland Tyne and Wear NHS Foundation Trust<br>Ferryhough, Charles; Durham University |
| Keywords:                     | MENTAL HEALTH, PSYCHIATRY, Randomized Controlled Trial                                                                                                                                                                                                                                                                                                                                                                                                                                                                                                                                                                                                                                                                                                                                                                                                                                                                                                                                                                                                                       |
|                               |                                                                                                                                                                                                                                                                                                                                                                                                                                                                                                                                                                                                                                                                                                                                                                                                                                                                                                                                                                                                                                                                              |

SCHOLARONE™  
Manuscripts

1  
2  
3 A targeted, computer/web based guided self-help psychoeducation toolkit for distressing  
4 hallucinations (MUSE) in people with an At Risk Mental State (ARMS) for psychosis: a study protocol  
5 for a randomised controlled feasibility trial.  
6  
7  
8  
9

## 10 11 Abstract

12  
13 Introduction: Individuals who access At Risk Mental State (ARMS) services often have unusual  
14 sensory experiences and levels of distress that lead them to seek help. The Managing Unusual  
15 Sensory Experiences (MUSE) treatment is a brief symptom targeted intervention that draws on  
16 psychological explanations to help account for unusual experiences. Practitioners to use formulation  
17 and behavioural experiments to support individuals to make sense of their experiences and enhance  
18 coping strategies. The primary objective of this feasibility trial is to resolve key uncertainties before a  
19 definitive trial and inform the parameters of a future fully powered trial.  
20  
21  
22  
23  
24

25  
26 Methods and analysis: 88 participants aged 14-35 accepted into ARMS services, experiencing  
27 hallucinations / unusual sensory experiences which are considered by the patient to be a key target  
28 problem will be recruited from UK NHS sites and randomised using 1:1 allocation (stratified by site,  
29 gender, and age) to either 6-8 sessions of MUSE or time matched treatment as usual. Participants  
30 and therapists will be unblind, research assessors are blind. Blinded assessment will occur at  
31 baseline, 12 weeks, and 20 weeks post randomisation. Data will be reported in line with CONSORT.  
32 Primary trial outcomes are feasibility outcomes, primary participant outcomes are functioning and  
33 hallucinations. Additional analysis will investigate potential psychological mechanisms and secondary  
34 mental wellbeing outcomes. Trial progression criteria follows signal of efficacy and uses an analytic  
35 framework with a traffic-light system to determine viability of a future trial. A subsequent analysis of  
36 the NHS England Mental Health Services Data Set 3 years post-randomisation will assess long-term  
37 transition to psychosis.  
38  
39  
40  
41  
42  
43  
44  
45

46  
47 Ethics and dissemination: This trial has received Research Ethics Committee approval. Dissemination  
48 will be to ARMS Services, participants, public and patient forums, peer-reviewed publications and  
49 conferences.  
50  
51

52  
53 Trial registration number: ISRCTN58558617.

54  
55 Funding: National Institute for Health and Care Research (NIHR) Research for Patient Benefit (RfPB)  
56 (NIHR204125).  
57  
58  
59  
60

### Strengths and limitations of this study

- This is a feasibility RCT. Results will address key uncertainties to inform a future large-scale trial, including sample size and design decisions.
- The MUSE intervention toolkit, the trial design and participant facing materials have been developed with substantial input from people with lived experience.
- This study is distinctive in exploring potential causal cognitive mechanisms in an at risk mental state population who have unusual sensory experiences.
- There is no Gold Standard treatment to compare the intervention to, therefore controlled time-matched Treatment as Usual (TAU) is selected as the comparator. In a meeting with ARMS service leads this was described as supportive psychotherapy.
- The follow-up period is short (20 weeks post randomisation), therefore longer-term participant impacts will not be assessed. However, consent is obtained for a follow-up evaluation at three years to examine transition to psychosis rates from the Mental Health Services Data Set (MHSDS).

### Background

At Risk Mental State (ARMS) describes presentations that indicate a potential prodromal stage of psychosis, or risk of psychosis, with around 25% of ARMS individuals converting to psychosis within 36 months (1). The importance of working with these individuals to target possible unhelpful beliefs in development, reduce distress, support healthy functioning, and potentially to prevent the development of full psychosis is widely advocated (2, 3).

The presence of unusual sensory experiences, such as hearing voices and seeing visions (hallucinations), may not in themselves indicate mental ill health as there may be common underlying psychological mechanisms or a continuum of experience from benign, everyday experiences to more severe hallucinations that require treatment (4). However, increased frequency and intensity of hallucinations, alongside distress and a decline in functioning, are linked to transition to psychosis and are threshold criteria in scales recommended in ARMS services (5, 6). Intervening to reduce the distress of unusual sensory experiences and offer explanations of the possible mechanisms behind these experiences may be key in preventing transition to psychosis (3, 7).

Current UK NICE guidelines recommend that people meeting ARMS criteria should be referred for specialist assessment and offered Cognitive Behavioural Therapy (CBT) to reduce the risk of

1  
2  
3 developing psychosis (8-10). While approaches involving CBT and CBT with supportive therapy show  
4 promise in ARMS, the evidence for CBT improving functioning and mental state, or reducing  
5 progression to psychosis, is inconclusive (11-13). No specific psychological intervention has been  
6 identified as having superior effectiveness in its treatment; there is no 'Gold Standard' treatment  
7 (11, 14, 15). ARMS services therefore need to further assess interventions that indicate potential  
8 benefit. Robust clinical trials are needed to determine benefits versus risk profiles, accessibility and  
9 cost effectiveness (11, 13, 16).

10  
11  
12 Treatment development would be improved if they addressed key causal mechanisms leading to  
13 distressing experiences, and adapted treatment to the needs of different age groups (17, 18). Taking  
14 a staged or stepped approach to psychological intervention is good practice, usually with CBT and  
15 needs-based interventions prior to pharmacology (8, 18, 19). There is scope for research into briefer  
16 approaches implemented prior to CBT in ARMS services, and emerging evidence from early  
17 intervention in psychosis research that inclusion of briefer targeted evidence-based interventions  
18 prior to CBT may result in a reduction of need for more in-depth CBT, as people better understand  
19 their experiences and have less need for interventions (20).

20  
21  
22 Through extensive multidisciplinary research into voice hearing, clinically embedded research with  
23 patients who are indicating at risk state for psychosis, and studies of first episode psychosis, we have  
24 developed a targeted, computer/web-based guided self-help psychoeducation toolkit for distressing  
25 hallucinations (MUSE) (7, 21). MUSE endeavours to provide scientific and normalising explanations  
26 that may provide acceptable and helpful understandings of an individual's unusual sensory  
27 experiences and help to prevent more delusional explanations from developing. MUSE has been  
28 trialled with an ARMS patient group in a non-randomised study (21) and shown to be acceptable  
29 with good participant satisfaction with the therapy. We intend to assess MUSE through a series of  
30 trials to determine patient benefit and possible impact on progression to psychosis in patients at  
31 high risk. We will also seek to learn more about whether change relates to target mechanisms  
32 underlying hallucination subtypes(22). This could be important for further refinement of treatment.

## 33 34 35 Objectives

### 36 37 38 Primary objective

39  
40  
41 To conduct an ISRCTN-registered feasibility randomised controlled trial to resolve key feasibility  
42 uncertainties and inform the parameters of a future trial, to investigate the preliminary effect of  
43 MUSE+TAU versus time-matched supportive psychotherapy TAU on general functioning (assessed  
44  
45  
46  
47  
48  
49  
50  
51  
52  
53  
54  
55  
56  
57  
58  
59  
60

1  
2  
3 using the Social and Occupational Functional Assessment Scale [SOFAS](23), and mental state  
4 related to frequency and distress of unusual sensory experiences and false beliefs (assessed using  
5 the Psychotic Symptom Rating Scales [PSYRATS](24) total score, and sub-scales Hallucinations and  
6 Attribution(25)) in ARMS patients post therapy and at five-month post randomisation follow-up.  
7  
8  
9

## 10 11 12 13 Secondary objectives

14  
15 To explore additional treatment effects on unusual sensory experiences, anxiety, depression, and  
16 quality of life, and whether there are indications of other factors (sleep disturbance and trauma)  
17 influencing treatment effects.  
18

19  
20 To test feasibility of collecting measures of psychological mechanisms, including psychological and  
21 personal (phenotypical) factors implicated in the clinical course of hallucinations. To analyse which  
22 psychological mechanisms are influenced by the treatment and contribute to its clinical effect and  
23 inform a future investigation of whether any efficacy of MUSE is through impact on these  
24 mechanisms.  
25  
26  
27  
28

29  
30 To collect routine data for a future records investigation testing feasibility of tracking transition to  
31 psychosis through medical databases (hospital records/Mental Health Services Data Set (MHSDS)), to  
32 examine which features of MUSE (presenting, treatment response and mechanistic) are most  
33 relevant to psychosis prevention.  
34  
35  
36  
37  
38

## 39 40 METHODS AND ANALYSIS

### 41 42 Trial design and flowchart

### 43 44 Methods and Analysis

45  
46 This is a feasibility trial employing a prospective randomised, open-label, observer blinded, endpoint  
47 design assessing a targeted, computer/web based guided self-help psychoeducation toolkit for  
48 distressing hallucinations (MUSE)+TAU (6 – 8 sessions) compared to a TAU time matched control  
49 (also referred to as supportive psychotherapy) (6 – 8 sessions) offered by a multi-disciplinary team  
50 which includes needs based emotional support, psychoeducation and stress management, aiming to  
51 reduce distress from hallucinations and improve functioning, in people with an At Risk Mental State  
52 (ARMS) for psychosis in UK secondary care mental health services.  
53  
54  
55  
56  
57  
58  
59  
60

1  
2  
3 The trial has received NHS Research Ethics positive opinion (23/NE/0032) and Health Research  
4 Authority Approvals and is registered with the ISRCTN registry (ISRCTN58558617, registered  
5 09.05.2023). Two substantial amendments followed first approval and were obtained prior to first  
6 participant consent: Amendment 1 notably added in an unvalidated Preferences Questionnaire for  
7 therapeutic intervention, and changed an anxiety self-report questionnaire over to use the State-  
8 Trait Anxiety Inventory – Short Form (STAI-Short Form)(26-28). Amendment 2 replaced a longer  
9 dissociative experiences questionnaire for the 8-item Brief Dissociative Experiences Scale [DES-B]—  
10 Modified(29, 30).

11  
12  
13  
14  
15  
16  
17 The trial has an independent trial steering committee (TSC) and Lived Experience Advisory Panel  
18 (LEAP) facilitated by a co-applicant for the study with lived experience of psychosis.

## 21 22 23 24 Participants

25  
26 Recruitment will be via NHS secondary care mental health clinical teams providing ARMS services.  
27 Patients who potentially meet the eligibility criteria for the trial, and their parent/guardian where  
28 appropriate if under 18 years, will be informed of the study by a member of their clinical team.  
29 Participants will be checked for eligibility prior to informed consent via discussion with referring  
30 teams and in the participant-researcher discussion prior to giving informed consent. Participant  
31 Information Sheets will be provided at least three days prior to the informed consent meeting.  
32 Written informed consent in adherence to principles of Good Clinical Practice (GCP) will be obtained  
33 prior to participation. For participants aged 14 and 15 years old, Parent/Guardian informed consent  
34 with child assent will be taken; this option of assent with Parent/Guardian consent will also be made  
35 available to participants aged 16 and 17 years old due to their potential vulnerability and the  
36 governing UK law which classes a minor as someone who is under 18 years old. Verbal consent form  
37 will be used for participants with literacy challenges. Interpreters and translated consent forms will  
38 be available for participants who do not speak English. Participants will be given £15 honorarium for  
39 each assessment time-point.

## 40 41 42 43 44 45 46 47 48 49 50 Trial eligibility criteria

### 51 52 Inclusion criteria

- 53 • in contact with an ARMS service or accepted on an ARMS pathway by EIP services
  - 54 • aged 14–35
- 55  
56  
57  
58  
59  
60

- hallucinations / unusual sensory experiences scoring at least 3 on the Perceptual Abnormalities Subscale of the Comprehensive Assessment of At-Risk Mental States (CAARMS)(6)
- hallucinations considered by the patient to be a key target problem
- judged to have been clinically stable for the preceding 2 weeks

#### Exclusion criteria

- intellectual disability or severe cognitive dysfunction affecting ability to engage with research materials
- lacking capacity to give informed consent

#### Randomisation and blinding

Eligible participants who have completed baseline assessments will be randomised and subsequent assessments will be scheduled from the point of randomisation. An independent web-based randomisation service (sealedenvelope.com) will be used for the trial. Randomisation will be in the ratio 1:1 to the two groups: MUSE+TAU (intervention) or TAU time matched control (supportive psychotherapy+TAU (control)). Randomisation will be stratified by site, gender (M/F/Other) and age (14–17years/18–35 years inclusive). Randomisation allocation will be independent and dynamically generated using a randomised modified minimisation method (31) to assure allocation concealment along with preservation of allocation ratio. Randomisation allocation is made known to the CI and site PIs, the Trial Coordinator(s) and the trial therapists only at the point of randomisation, by email.

Research assessors for the trial will be blind to the allocation throughout the trial. Clinicians, therapists and participants will be unblind. Trial statisticians will be partially blind; In the first instance, for the analyses and reporting of main outcomes of the trial the Statisticians will be fully blind. However, for secondary sensitivity analysis such as impact of number of MUSE sessions on effect size) and the mechanisms investigations, the Statisticians will be required to view which participants received MUSE treatment.

#### Assessments

Assessors blinded to trial allocation will complete participant assessments at baseline, 12 weeks post randomisation, and 20 weeks post randomisation (See Table 1). Sociodemographic information will be collected from the participant at baseline only (CSRI questions 1-3.5 as amended for the trial(32)).



Table 1: Trial Assessments and Key Participant Procedures Schedule

| Assessments/<br>procedures                                                                     | Participant<br>identification | &<br>Enrolment<br>baseline | Randomisation | Intervention<br>Weeks<br>1-12 | 12<br>weeks<br>post<br>randomisation<br>(+/-<br>10days) | 20<br>weeks<br>post<br>randomisation<br>(+/-<br>10days) |
|------------------------------------------------------------------------------------------------|-------------------------------|----------------------------|---------------|-------------------------------|---------------------------------------------------------|---------------------------------------------------------|
| Recruitment and eligibility discussions                                                        | X                             |                            |               |                               |                                                         |                                                         |
| Informed consent                                                                               |                               | X                          |               |                               |                                                         |                                                         |
| CSRI Sociodemographic Q1-3.5                                                                   |                               | X                          |               |                               |                                                         |                                                         |
| Randomisation                                                                                  |                               |                            | X             |                               |                                                         |                                                         |
| MUSE & TAU / TAU Intervention                                                                  |                               |                            |               | ↔                             |                                                         |                                                         |
| <b>Blinded assessments</b>                                                                     |                               |                            |               |                               |                                                         |                                                         |
| MUSE ARMS Primary Outcome Measures: SOFAS & PSYRATS                                            |                               | X                          |               |                               | X                                                       | X                                                       |
| CSRI service use Q4.1-4.4                                                                      |                               | X                          |               |                               |                                                         |                                                         |
| CSRI Q4.5 criminal justice services and Q5 medication                                          |                               | X                          |               |                               | X                                                       | X                                                       |
| MUSE ARMS Secondary Outcome Measures: CAARMS-PA, PHQ-9, GAD-7, ReQoL-20, ISI, ITQ/ITQ-CA, MMHQ |                               | X                          |               |                               | X                                                       | X                                                       |
| Subtype Measures & Cognitive Tasks (1-2 subtypes selected per participant)                     |                               | X                          |               |                               | X                                                       | X                                                       |
| Treatment preference                                                                           |                               | X                          |               |                               |                                                         |                                                         |
| <b>Unblinded assessments</b>                                                                   |                               |                            |               |                               |                                                         |                                                         |
| CSRI service use at follow-up Q4.1-4.4                                                         |                               |                            |               |                               | X                                                       | X                                                       |
| Transition to Psychosis data                                                                   |                               |                            |               |                               | X                                                       | X                                                       |
| Adverse Event (AE) data                                                                        |                               |                            |               |                               | X                                                       | X                                                       |
| Therapeutic Alliance STTS-R                                                                    |                               |                            |               |                               | X                                                       |                                                         |
| Participants interviews (Withdrawals sub-sample)                                               |                               |                            |               | ↔                             |                                                         |                                                         |
| Participants interviews (MUSE completers sub-sample)                                           |                               |                            |               |                               | ↔                                                       | ↔                                                       |
| Participants interviews (TAU sub-sample)                                                       |                               |                            |               |                               | ↔                                                       | ↔                                                       |
| Therapists interviews (sub-sample)                                                             |                               |                            |               |                               | ↔                                                       | ↔                                                       |

### Primary indicators of outcome

The primary outcome measures are: (i) Feasibility outcomes, including qualitative interviews; (ii) General functioning assessed using the SOFAS(23), a clinician/clinical researcher rated single-item scale; (iii) Target problem hallucinations assessed using the PSYRATS(24) (hallucination total) clinician/clinical researcher rated interview, and; (iv) Distress and attribution dimensions of target problem assessed using the PSYRATS (25).

### Secondary assessments

1  
2  
3 Additional assessments will be the clinician/clinical researcher administered semi-structured  
4 interview CAARMS subscale of Perceptual Abnormalities(6) to elicit further detail about the nature  
5 of unusual experiences. Self-reported measures will rate depression symptom severity (PHQ-9(33)),  
6 anxiety (GAD-7(34)), quality of life (ReQoL-20(35)), sleep difficulties (ISI(36)), and trauma (ITQ/ITQ-  
7 CA(37, 38)). An unvalidated measure, the Multi-Modal Hallucinations Scale (MMHS) will be used to  
8 assess cross-modal sensory experiences.  
9  
10  
11  
12

#### 13 Service use

14  
15  
16 Assessment of potential contamination of the MUSE intervention within the TAU condition, of other  
17 psychological therapies use within the treatment arms, and the need for additional interventions  
18 beyond the treatment phase will be captured using the CSRI(32) (as amended for the trial) at  
19 baseline, 12 week and 20 week follow-up. CSRI service use data at 12 weeks and 20 weeks will be  
20 collected from medical notes by the unblinded researcher to preserve blinding of research assessors.  
21  
22  
23  
24

#### 25 Mechanisms assessment

26  
27 To assess further information on mechanisms, subtype measures & cognitive tasks will be selected  
28 per participant for 1 to 2 hallucination subtypes: (i) Inner speech, using the Varieties Of Inner Speech  
29 Questionnaire (VISQ-R)(39), and computerised cognitive tasks Auditory Signal Detection Task and  
30 Auditory Reality Monitoring Source Memory Task (40, 41); (ii) Memory, using the Brief Dissociative  
31 Experiences Scale —Modified (DES-B)(29, 30) and computerised cognitive task Inhibition of Currently  
32 Irrelevant Memories (ICIM)(42); (iii) Hypervigilance, using the State-Trait Anxiety Inventory – Short  
33 Form (STAI-Short Form)(26-28), and computerised cognitive Jumbled Speech Task (JST)(43, 44), and;  
34 (iv) Visual, using the visual section of the Plymouth Sensory Imagery Questionnaire (Psi-Q)(45) , and  
35 computerised cognitive tasks Visual Signal Detection(46), Visual Reality Monitoring(47) and Face  
36 Pareidolia Task(46). Researchers receive training on subtype selection. Selections are monitored and  
37 evaluated against MUSE therapist subtype selections to assess selection reliability and potential  
38 training needs.  
39  
40  
41  
42  
43  
44  
45  
46  
47

#### 48 Acceptability assessment

49  
50  
51 To assess therapy preference, satisfaction and acceptability of the intervention, participants will be  
52 asked about treatment preferences at baseline using a study specific preferences questionnaire (see  
53 supplementary materials), and treatment satisfaction post intervention using the Satisfaction with  
54 Therapy and Therapist Scale-Revised (STTS-R)(48, 49). Qualitative interviews with participants and  
55 trial therapists will further explore experience of MUSE, TAU, and trial procedures.  
56  
57  
58  
59

#### 60 Long-term outcomes

1  
2  
3 Long-term transition to psychosis outcomes will be collected 3 years post baseline via the NHS  
4 England Mental Health Services Data Set (MHSDS).

#### 6 7 Data management

8  
9 Interview/clinical assessments data will be scored following the visit and entered onto Qualtrics by  
10 the researcher. Source data will be retained in the site file. Self-report data will be entered directly  
11 onto Qualtrics during visits using participant ID and visit as markers. Unblinded data on service use  
12 will be entered onto Qualtrics at the visit time points. Qualtrics outputs and computerised cognitive  
13 task data will be downloaded and date stamped at regular intervals to allow data audit. The full data  
14 set will be transferred in its anonymous form to the stats team upon completion of data lock at the  
15 end of the trial. Trial monitoring at sites will occur across the life cycle of the trial and will follow the  
16 Sponsor approved data monitoring plan.

#### 17 18 Intervention - Managing Unusual Sensory Experiences (MUSE)+TAU

19  
20 The MUSE intervention is a novel targeted, computer/web-based guided self-help psychoeducation  
21 toolkit and psychological treatment manual for managing distressing hallucinations in mental health,  
22 developed and owned jointly by Durham University and CNTW. Patients work with experienced  
23 therapists, under expert supervision, who utilise the MUSE package within therapy sessions to  
24 develop a formulation explaining the development of hallucinations and foster new skills and  
25 strategies for their management. The MUSE treatment is divided into the following modules: What  
26 are Voices?; How the Mind Works; Assessment (of participant subtype); Inner Speech; Memory and  
27 Trauma; Hypervigilance; and Sleep (see Dudley, Dodgson (50) for details).

28  
29 Six to eight 1-hour sessions will be offered weekly by experienced therapists who are clinical  
30 psychologists or psychological therapists. Therapists will be accredited or working towards  
31 accreditation by the British Association of Behavioural and Cognitive Psychotherapists (BABCP),  
32 employed by the ARMS service and have experience of MUSE, receiving clinical supervision and  
33 fortnightly MUSE supervision. MUSE is loaded onto therapists smart tablet/NHS laptop (not reliant  
34 on Wi-Fi) and is available to patients via the CNTW website between sessions. No personal data are  
35 recorded or stored on MUSE toolkit.

36  
37 Session by session measures will be used as part of the MUSE package to enable therapists to  
38 monitor any variations in hallucination frequency and distress that may have a bearing on the  
39 selection of module used or revisited during the treatment session.

40  
41 Therapists will be asked to complete adherence checklists for each session contained within a per-  
42 participant MUSE Therapist Pack (see supplementary materials). With consent, each session will be  
43  
44  
45  
46  
47  
48  
49  
50  
51  
52  
53  
54  
55  
56  
57  
58  
59  
60

1  
2  
3 audio-recorded to enable independent review by the site Principal Investigator or delegated Clinical  
4 Lead of a random 10% sample to ensure fidelity to protocol within and across sites.  
5  
6  
7  
8

9 Control condition – Time matched control +TAU  
10

11 To control for risk of bias from an undefined comparative treatment, and potential bias from dose  
12 effects, a time matched TAU is included(11, 51). In order to match the comparative brief  
13 intervention to usual practice within ARMS services, components of care were identified in an  
14 engagement meeting with ARMS service leads. These common core components could be described  
15 as supportive psychotherapy or ongoing care (needs based emotional support, psychoeducation,  
16 normalisation and stress management) and were outlined as the interventions used by therapists as  
17 part of their normal clinical toolkit, alongside routine multi-disciplinary care from the team. Patients  
18 work with different therapists who are ARMS clinicians and are not trained in MUSE. These clinicians  
19 will receive supervision on their practice through the routine supervision arrangements of their  
20 service and will record the interventions used within a per-participant TAU Therapist Pack (see  
21 supplementary materials). We will investigate how frequently and consistently these supportive  
22 psychotherapy interventions are offered to inform whether these interventions could act as a  
23 comparator intervention in future trials. This arm will be time-matched controlled, however  
24 variation across services precluded using this comparator being defined as a controlled *intervention*.  
25 Number of sessions received in this group will be recorded for analysis.  
26  
27  
28  
29  
30  
31  
32  
33  
34  
35  
36

37 Both Groups: Treatment as Usual (TAU)  
38

39 In addition to the trial allocated intervention (MUSE or TAU Time matched control supportive  
40 psychotherapy), both treatment groups will also receive additional usual care as clinically indicated.  
41 No treatments will be withheld on account of being part of the trial. This includes regular  
42 monitoring, signposting to appropriate local services for unmet needs, social support and crisis  
43 management when required from the multi-disciplinary team. CBT is also a core intervention  
44 recommended by NICE Guidance and offered across ARMS services. However, in practice it is not  
45 always offered to all service users. CBT may form part of the care in both conditions as part of usual  
46 care. We will investigate the number of CBT sessions received by participants in both groups and  
47 investigate whether MUSE impacts on the number of sessions required. Additional care will be based  
48 on clinical judgement and will be recorded for both arms of the study. These additional elements of  
49 care, including interventions and contacts that occur beyond the MUSE/time-matched period will be  
50 analysed for variations and similarities in the care received between the two groups.  
51  
52  
53  
54  
55  
56  
57  
58  
59  
60

## Analysis

Analyses will follow intention to treat principles, with data analysed according to randomisation irrespective of treatment received. A full statistical analysis plan (SAP) will be developed for the outcome measures and agreed with TSC before the end of data collection. Data will be reported in line with the Consolidated Standards of Reporting Trials (CONSORT)(52), see figure 1.

## Sample size

As this is a feasibility trial there is no formal sample size calculation, interim analyses or stopping rule. The trial aims to recruit 88 participants with 70 participants completing the study (allowing for 20% attrition) to be able to robustly calculate the sample size for a definitive trial(53).

## Statistical analysis

Feasibility outcomes will be analysed primarily: the ability of the trial to recruit participants, who reflect the diversity within the region, and meet study inclusion criteria over the 9-month recruitment period, who complete assessment measures collected at baseline, post intervention and follow-up, until all participants complete the follow-up assessment or withdraw.

Descriptive statistics within each randomised group will be presented for baseline and follow-up points. All data will be summarised as appropriate using mean±standard deviation and median±interquartile range for continuous outcome data; frequency and percentages for binary or categorical data; and rate for count data. Analysis will be via the latest version of R.

The signal of efficacy will be determined by examining the effect of each arm (MUSE versus supportive psychotherapy) on outcomes measures, estimated as change from baseline.

The effects will be estimated using generalised linear mixed effect models with the appropriate distribution and link function. Normal distributions with identity link will be used for continuous outcomes, and negative-binomial distributions with log link for count data outcomes. All binary or categorical outcomes will be analysed using generalised estimating equations (GEE). The mixed-effects models and GEE account for the repeated measurements per participant over the follow-up time points. All models will be adjusted for treatment arms and stratification variables. The mixed model approach taken will allow identifying the individual effect of the two interventions with relation to their baseline, as well as the difference in their effects through an interaction parameter of time and intervention. This can be considered as a model-based difference-in-difference analysis.

1  
2  
3 These models will be used mainly to estimate relevant parameters, since the trial is not powered for  
4 null hypothesis significance-testing. That is, while we are interested in identifying the magnitude of  
5 the signal of efficacy, we will not attempt to prove its significance.  
6  
7

8  
9 In addition, a mediation analysis will examine how the different mechanism components mediate  
10 the estimated impact of the interventions on the primary outcomes, and a complier average causal  
11 effects (CACE) analysis will determine the impact of the number of sessions on the MUSE effect.  
12  
13

14 If data are missing for a particular participant and outcome measure, this participant will be  
15 excluded from the analysis, for this outcome measure only, without further adjustment for  
16 missingness. However, the effect of missing data will be investigated additionally by sensitivity  
17 analysis using tabulation of rate of missingness across trial arms and imputation methods.  
18  
19  
20  
21  
22  
23

#### 24 Qualitative analysis

25  
26 Audio-recordings will be transcribed and analysed (in NVivo software). Interview transcripts will be  
27 analysed using thematic analysis(54) allowing a transparent, replicable and robust process and  
28 demonstration of reflexivity and quality. Transcripts will be coded by two researchers until coding  
29 reliability is established; coding will then be conducted by one researcher, with reliability checks by  
30 the qualitative lead. Data will be extracted into a framework matrix, summarising data by category  
31 from individual transcripts, with quotations selected as illustrative exemplars. Initial findings from  
32 the qualitative analyses will be presented to LEAP for feedback on interpretation.  
33  
34  
35  
36  
37  
38  
39  
40  
41

#### 42 Health economics analysis

43  
44 As a feasibility study, we are not undertaking a formal economic evaluation at this stage but will  
45 inform a health economic evaluation in a future definitive trial by piloting the ReQoL-Utility Index  
46 with the ReQoL-20 data for health economic analysis calculation.  
47  
48  
49  
50  
51

#### 52 Criteria for proceeding to a future trial

53  
54 The signal of efficacy is dependent upon the primary outcome data (SOFAS, PSYRATS Total, PSYRATS  
55 distress, PSYRATS attribution) and follows: i) Go: primary outcome data suggest the intervention  
56 may show an effect indicating clinical value warranting further investigation; ii) Refine: primary  
57  
58  
59  
60

1  
2  
3 outcome data indicate no measure of effect, but one or more secondary outcomes indicates an  
4 effect; iii) Stop: no effect across any outcomes.  
5  
6

7 The trial progression criteria will follow signal of efficacy and cover domains of research delivery,  
8 therapy engagement and fidelity, and safety. The criteria were influenced by LEAP and TSC input and  
9 sign-off. Trial progression criteria uses an analytic framework(58) with a traffic-light system (see  
10 Table 2 in supplementary materials). Progression will depend upon: (i) All Green outcomes:  
11 no/minor revisions prior to next development of the trial, or; (ii) One or more Amber (but not Red)  
12 outcomes: If feasible, substantial alterations to the trial protocol, assessments or intervention,  
13 supported by the qualitative work-stream and discussed with TMG and TSC prior to the next  
14 development of the trial or; (iii) If one or more Red outcomes result then the trial is unlikely to  
15 progress at that site or very substantial amendments are needed. The mechanism measures and  
16 tasks will also be reviewed for sensitivity to change and reliability to inform the next development of  
17 the trial.  
18  
19  
20  
21  
22  
23  
24  
25

26 Decisions regarding any changes will consider the ADePT decision-making process to address  
27 potential problems with intervention, clinical setting, or trial design that may be relevant in either a  
28 trial setting or real world context(58). We will use qualitative data to contextualise our progression  
29 criteria, to ensure that the participant feedback informs our understanding of our research delivery  
30 and signal of efficacy.  
31  
32  
33  
34

### 35 Adverse events

36  
37 Serious Adverse Events (SAEs) are defined as: results in death; is life-threatening; requires  
38 hospitalisation or prolongation of existing hospitalisation; results in persistent or significant disability  
39 or incapacity; results in congenital anomaly or birth defect; or is otherwise considered medically  
40 significant by the investigator. Any SAEs shall be assessed immediately for trial relatedness and  
41 expectedness and reported to the Sponsor. Any related and unexpected SAEs and any Urgent Safety  
42 Measures (defined as: early withdrawal of participant(s) due to safety concerns about the  
43 intervention or assessments, or; changes to procedures due to concerns about staff or participant  
44 safety) shall be reported immediately to the Sponsor and Research Ethics Committee in accordance  
45 with Health Research Authority governance regulations (See: [https://www.hra.nhs.uk/approvals-  
46 amendments/managing-your-approval/safety-reporting/](https://www.hra.nhs.uk/approvals-amendments/managing-your-approval/safety-reporting/)) and Sponsor standard operating  
47 procedures.  
48  
49  
50  
51  
52  
53  
54  
55

56 Adverse events will be recorded for all participants where the event relates to mental state, with  
57 focus on clinically significant: a) increases in distress and/or psychosis; b) increased harm to  
58  
59  
60

1  
2  
3 self/harm to others; c) increased suicidal ideation/attempts; d) increased use of drugs/alcohol; e)  
4 emergency room visits for mental health concerns; f) access to crises services.  
5  
6  
7  
8  
9

#### 10 Patient and public involvement (PPI)

11 The MUSE intervention, the trial design and participant facing materials and the grant application  
12 have benefitted from input by individuals with lived experience. To ensure a retained focus on  
13 patients, a Lived Experience Advisory Panel (LEAP) led by a co-applicant with personal lived  
14 experience of psychosis was established and meets monthly in a mixture of online and face-to-face  
15 formats throughout the lifetime of the trial. The study specific Preferences questionnaire was  
16 collaboratively developed with the LEAP. The outcome measures and the topic guides were piloted  
17 with LEAP members and amended following feedback. The LEAP were consulted on the potential  
18 ethical issues of the trial and the trial progression criteria. Members of the LEAP group will also co-  
19 facilitate qualitative interviews, help disseminate study findings, and enable patient experience to  
20 inform design of future research and any revisions of the treatment. Two LEAP members are part of  
21 the TSC, with one taking a lead on trial procedures and the other on the inclusion of under-served  
22 groups. Compensation for work done is given in accordance with NIHR PPI guidelines  
23 ([https://www.nihr.ac.uk/documents/ppi-patient-and-public-involvement-resources-for-applicants-  
24 to-nihr-research-programmes/23437](https://www.nihr.ac.uk/documents/ppi-patient-and-public-involvement-resources-for-applicants-to-nihr-research-programmes/23437)).  
25  
26  
27  
28  
29  
30  
31  
32  
33  
34  
35  
36  
37  
38  
39

#### 40 Ethics and dissemination

41 This trial has obtained NHS Research Ethics Committee (REC) positive opinion from Newcastle North  
42 Tyneside 1 REC (reference: 23/NE/0032), and UK Health Research Authority approval (IRAS project  
43 ID: 323903). The research Sponsor is Cumbria, Northumberland, Tyne and Wear NHS Foundation  
44 Trust (CNTW).  
45  
46  
47

48 An anonymised version of the main outcome quantitative data and mechanisms data will be  
49 available either in open access as encouraged by peer review publications or from the trial team on  
50 reasonable request with publication of the trial outcomes paper and mechanisms paper.  
51  
52  
53

54 The research outcomes shall be submitted for peer review open access publications from this trial.  
55 Anonymised data will be made available in a repository. Trial outcomes, mechanisms evaluations,  
56 and long-term outcomes will be reported on.  
57  
58  
59  
60



1  
2  
3 The Trial outcomes: The feasibility trial outcomes will report on feasibility outcomes and the  
4 candidate primary outcome measures (SOFAS and PSYRATS). Secondary reporting will detail the  
5 secondary treatment effects and influence of moderators. Additional reporting will detail treatment  
6 integrity: data on treatment adherence to the model (sessions checklist data); exposure of  
7 participants to the interventions and additional treatments within usual care (CSRI data); the quality  
8 of treatment delivered and responsiveness of participants as reflected on by therapists and  
9 participants (STTS-R data, qualitative data); and the programme differentiation between the novel  
10 intervention arm and the usual care arm (CSRI data).  
11  
12  
13  
14  
15

16  
17 Mechanisms will be reported on the analysis of secondary assessments for the purposes of  
18 informing which aspects of patient presentation the MUSE intervention works with, and informing  
19 the outcome measures in a future efficacy and mechanisms trial.  
20  
21  
22

23 Long-term transition to psychosis paper: Long-term transition to psychosis through the  
24 MHSDS/medical records exploratory feasibility analysis will report which features of MUSE  
25 (presentation, treatment response, mechanistic) are indicated as most relevant to psychosis  
26 prevention.  
27  
28  
29

#### 30 Trial status

31  
32 The trial opened to recruitment at the two planned NHS sites on the 14<sup>th</sup> April 2023 (Cumbria,  
33 Northumberland, Tyne and Wear NHS Foundation Trust) and 21<sup>st</sup> April 2023 (Tees, Esk and Wear  
34 alley NHS Foundation Trust). First participant randomisation (enrolment) was on 10<sup>th</sup> May 2023.  
35 Final participant facing procedures are due to be completed by end of June 2024. The study will  
36 finish at NHS research sites after the final assessment with the final participant is completed and the  
37 monitoring close-out visit has occurred at site.  
38  
39  
40  
41  
42

#### 43 Acknowledgments

44  
45 We are grateful to our Sponsor, Cumbria, Northumberland, Tyne and Wear NHS Foundation Trust  
46 and the sponsorship team for their backing and support, and to the many individuals in the  
47 collaborating institutions who have enabled this trial to run. We are grateful to the dedicated  
48 involvement and contributions of the MARS Lived Experience Advisory Panel Group members, all  
49 who wish to remain anonymous and those who are happy to be named. Thank you to Gayl McCain,  
50 Katie Rumney, Helen Errington, Patricia Higgins and the whole group. Thanks is noted especially to  
51 all of the people who over the course of this research agree to receive information on the study and  
52 consider whether would like to take part. A number of people gave their time and expertise in  
53 reviewing iterations of the trial development and supporting the trial through the various funding  
54  
55  
56  
57  
58  
59  
60

1  
2  
3 and approvals systems, who include Stephanie Common, Angus Williams, and others, and our  
4 appreciation is noted. The study has also benefitted from the technical contributions of the  
5 psychologists David Smailes (ORCID ID: 0000-0002-0455-070X) and Peter Moseley (ORCID ID: 0000-  
6 0002-9284-2509) who respectively built the computerised cognitive tasks used in the trial, we are  
7 grateful for this contribution. We would not be able to run the trial without the daily contribution  
8 also from all of the trial researchers on the ground who work within the NHS trusts to support the  
9 day to day running of trial operations, communication with participants, recruitment to the research  
10 and to conduct research assessments, thank you to Michael Kelly, Abbey Underwood, Alexandra  
11 Carne, Sarah Bentley, Emily Clare, Melanie Rowe, Victoria Wilson, Sarah Garner and others, thank  
12 you. Tremendous thanks is also given to all of the therapists who work into the NHS ARMS services  
13 who are delivering the interventions for this study, Carina Ewels, Eloise Todd, Louise Ross, Andrew  
14 Weightman, Claire Mason, Toyah Lebert, Mark Dawson, Louise Leach, Nicola Elliot, Paul Williams,  
15 Luke Rogers, Alison Bernard and to all of the individuals who support these services to function.

#### Contributors

Authorship follows ICMJE recommendations:

<https://www.icmje.org/recommendations/browse/roles-and-responsibilities/defining-the-role-of-authors-and-contributors.html>

JH is the trial manager and wrote the final protocol and protocol paper. GD is the chief investigator and has overall responsibility for the trial design and drafted the initial trial protocol. GD and CF are the joint study leads and lead on supervision and trial decisions. BA, CA, NB, TB, LD, CG, and JS contributed to the study design. GD and CF led the development of the treatment with substantial input from a range of clinicians and service users. CG was responsible for patient and public involvement. JE and EK are responsible for the statistical analysis design. NB, JS, and LB coordinated the trial at sites and were responsible for recruitment. All authors read and approved the final trial protocol.

#### Funding

This project is funded by the National Institute for Health and Care Research (NIHR) under its Research for Patient Benefit (RfPB) Programme (Grant Reference Number NIHR204125). The views expressed are those of the author(s) and not necessarily those of the NIHR or the Department of Health and Social Care.

#### Competing interests

GD, RD, JS, NB and CA provide psychological therapies for individuals with psychosis in NHS settings. RD receives payment for workshops in treating hallucinations. GD, RD, CF, NB, and CA hold or have

1  
2  
3 held grants to develop and carry out trials of psychological therapy for individuals with psychosis. LD  
4 provides sponsorship oversight of trials in CNTW NHS FT. All other authors declare no competing  
5 interest. The MUSE toolkit is the joint intellectual property of Durham University and Cumbria,  
6 Northumberland, Tyne and Wear NHS Foundation Trust and will be made freely available if proven  
7 to be beneficial.  
8  
9

#### 10 Patient and public involvement

11  
12 Patients and/or the public were involved in the design, or conduct, or reporting, or dissemination  
13 plans of this research. Refer to the Methods section for further details.  
14

#### 15 Patient consent for publication

16 Not applicable.  
17

#### 18 Provenance and peer review

19 Not commissioned; peer reviewed for ethical and funding approval prior to submission.  
20

#### 21 Open access

22 This is an open access article distributed in accordance with the Creative Commons Attribution 4.0  
23 Unported (CC BY 4.0) license, which permits others to copy, redistribute, remix, transform and build  
24 upon this work for any purpose, provided the original work is properly cited, a link to the licence is  
25 given, and indication of whether changes were made. See:  
26 <https://creativecommons.org/licenses/by/4.0/>.  
27  
28  
29  
30  
31  
32  
33  
34  
35  
36  
37  
38  
39  
40  
41  
42  
43

#### 44 References

- 45 1. Salazar de Pablo G, Radua J, Pereira J, Bonoldi I, Arienti V, Besana F, et al. Probability of  
46 Transition to Psychosis in Individuals at Clinical High Risk An Updated Meta-analysis. *JAMA*  
47 *Psychiatry*. 2021;78:970-8.
- 48 2. Salazar De Pablo G, Estradé A, Cutroni M, Andlauer O, Fusar-Poli P. Establishing a clinical  
49 service to prevent psychosis: What, how and when? *Systematic review*. *Translational Psychiatry*.  
50 2021;11(1).
- 51 3. Yung AR, Wood SJ, Malla A, Nelson B, McGorry P, Shah J. The reality of at risk mental state  
52 services: a response to recent criticisms. *Psychological Medicine*. 2021;51(2):212-8.
- 53 4. Toh WL, Moseley P, Fernyhough C. Hearing voices as a feature of typical and  
54 psychopathological experience. *Nature Reviews Psychology*. 2022;1(2):72-86.
- 55 5. Nelson B, Yung A, Markulev C, Nicoll M. The CAARMS: assessing young people at ultra high  
56 risk of psychosis: Orygen Youth Health Research Centre; 2014.  
57  
58  
59  
60

- 1
  - 2
  - 3
  - 4
  - 5
  - 6
  - 7
  - 8
  - 9
  - 10
  - 11
  - 12
  - 13
  - 14
  - 15
  - 16
  - 17
  - 18
  - 19
  - 20
  - 21
  - 22
  - 23
  - 24
  - 25
  - 26
  - 27
  - 28
  - 29
  - 30
  - 31
  - 32
  - 33
  - 34
  - 35
  - 36
  - 37
  - 38
  - 39
  - 40
  - 41
  - 42
  - 43
  - 44
  - 45
  - 46
  - 47
  - 48
  - 49
  - 50
  - 51
  - 52
  - 53
  - 54
  - 55
  - 56
  - 57
  - 58
  - 59
  - 60
6. Yung AR, Yuen HP, McGorry PD, Phillips LJ, Kelly D, Dell'Olio M, et al. Mapping the onset of psychosis: the Comprehensive Assessment of At-Risk Mental States. *Aust N Z J Psychiatry* 2005;39:964–71.
7. Dodgson G, Alderson-Day B, Smailes D, Ryles F, Mayer C, Glen-Davison J, et al. Tailoring cognitive behavioural therapy to subtypes of voice-hearing using a novel tabletised manual: a feasibility study. *Behavioural and Cognitive Psychotherapy*. 2021;49(3):287-301.
8. NICE. Psychosis and schizophrenia in adults: prevention and management. 2014:1-40.
9. NICE. Psychosis and schizophrenia. 2021.
10. NICE. Psychosis and schizophrenia in children and young people: recognition and management. 2013:1-48.
11. Bosnjak Kuharic D, Kekin I, Hew J, Rojnic Kuzman M, Puljak L. Interventions for prodromal stage of psychosis. *Cochrane Database Syst Rev*. 2019;2019(11).
12. Mei C, van der Gaag M, Nelson B, Smit F, Yuen HP, Berger M, et al. Preventive interventions for individuals at ultra high risk for psychosis: An updated and extended meta-analysis. *Clinical psychology review*. 2021;86:102005.
13. Stafford MR, Jackson H, Mayo-Wilson E, Morrison AP, Kendall T. Early interventions to prevent psychosis: systematic review and meta-analysis. *BMJ*. 2013;346(jan18 1):f185-f.
14. Fusar-Poli P, Davies C, Solmi M, Brondino N, De Micheli A, Kotlicka-Antczak M, et al. Preventive Treatments for Psychosis: Umbrella Review (Just the Evidence). *Front Psychiatry*. 2019;10:764.
15. van der Gaag M, van den Berg D, Ising H. CBT in the prevention of psychosis and other severe mental disorders in patients with an at risk mental state: A review and proposed next steps. *Schizophrenia research*. 2019;203:88-93.
16. Aceituno D, Vera N, Prina AM, McCrone P. Cost-effectiveness of early intervention in psychosis: systematic review. *The British Journal of Psychiatry*. 2019;215(01):388-94.
17. Wykes T, Bell A, Carr S, Coldham T, Gilbody S, Hotopf M, et al. Shared goals for mental health research: what, why and when for the 2020s. *Journal of Mental Health*. 2021:1-9.
18. Schmidt SJ, Schultze-Lutter F, Schimmelmann BG, Maric NP, Salokangas RK, Riecher-Rössler A, et al. EPA guidance on the early intervention in clinical high risk states of psychoses. *Eur Psychiatry*. 2015;30(3):388-404.
19. Addington J, Addington D, Abidi S, Raedler T, Remington G. Canadian Treatment Guidelines for Individuals at Clinical High Risk of Psychosis. *Can J Psychiatry*. 2017;62(9):656-61.
20. Drake RJ, Day CJ, Picucci R, Warburton J, Larkin W, Husain N, et al. A naturalistic, randomized, controlled trial combining cognitive remediation with cognitive-behavioural therapy after first-episode non-affective psychosis. *Psychol Med*. 2014;44(9):1889-99.
21. Dodgson G, Aynsworth C, Mitrenga KJ, Gibbs C, Patton V, Fernyhough C, et al. Managing unusual sensory experiences: A feasibility trial in an At Risk Mental States for psychosis group. *Psychology and Psychotherapy: Theory, Research and Practice*. 2021;94(3):481-503.
22. McCarthy-Jones S, Thomas N, Strauss C, Dodgson G, Jones N, Woods A, et al. Better than mermaids and stray dogs? Subtyping auditory verbal hallucinations and its implications for research and practice. *Schizophrenia bulletin*. 2014;40 Suppl 4(Suppl 4):S275-84.
23. Goldman HH, Skodol AE, Lave TR. Revising axis V for DSM-IV: a review of measures of social functioning. *Am J Psychiatry*. 1992;149(9):1148-56.
24. Haddock G, McCarron J, Tarrrier N, Faragher EB. Scales to measure dimensions of hallucinations and delusions: the psychotic symptom rating scales (PSYRATS). *Psychol Med*. 1999;29(4):879-89.
25. Woodward TS, Jung K, Hwang H, Yin J, Taylor L, Menon M, et al. Symptom dimensions of the psychotic symptom rating scales in psychosis: a multisite study. *Schizophrenia bulletin*. 2014;40 Suppl 4(Suppl 4):S265-74.
26. Zsido AN, Teleki SA, Csokasi K, Rozsa S, Bandi SA. Development of the short version of the spielberger state-trait anxiety inventory. *Psychiatry Res*. 2020;291:113223.

- 1
  - 2
  - 3
  - 4
  - 5
  - 6
  - 7
  - 8
  - 9
  - 10
  - 11
  - 12
  - 13
  - 14
  - 15
  - 16
  - 17
  - 18
  - 19
  - 20
  - 21
  - 22
  - 23
  - 24
  - 25
  - 26
  - 27
  - 28
  - 29
  - 30
  - 31
  - 32
  - 33
  - 34
  - 35
  - 36
  - 37
  - 38
  - 39
  - 40
  - 41
  - 42
  - 43
  - 44
  - 45
  - 46
  - 47
  - 48
  - 49
  - 50
  - 51
  - 52
  - 53
  - 54
  - 55
  - 56
  - 57
  - 58
  - 59
  - 60
27. Spielberger CD. State-Trait Anxiety Inventory. The Corsini Encyclopedia of Psychology 1983.
28. Spielberger CD, Gorsuch RL, Lushene RE. Manual for the State-Trait Anxiety Inventory 1970.
29. Dalenberg C, Carlson E. Severity of Dissociative Symptoms—Adult (Brief Dissociative Experiences Scale [DES-B]—Modified) [Measurement instrument]. American Psychiatric Association; 2010.
30. Dalenberg C, Carlson E. Severity of Dissociative Symptoms—Child Age 11–17 (Brief Dissociative Experiences Scale [DES-B]—Modified) [Measurement instrument]. . American Psychiatric Association; 2010.
31. Kuznetsova OM, Tymofyeyev Y. Preserving the allocation ratio at every allocation with biased coin randomization and minimization in studies with unequal allocation. *Statistics in Medicine*. 2012;31(8):701-23.
32. Beecham J, Knapp M. Costing psychiatric interventions. In: Thornicroft G, editor. *Measuring Mental Health Needs*. 2nd ed: Gaskell; 2001. p. 200-24.
33. Kroenke K, Spitzer RL, Williams JB. The PHQ-9: validity of a brief depression severity measure. *J Gen Intern Med*. 2001;16(9):606-13.
34. Spitzer RL, Kroenke K, Williams JB, Löwe B. A brief measure for assessing generalized anxiety disorder: the GAD-7. *Arch Intern Med*. 2006;166(10):1092-7.
35. Keetharuth AD, Brazier J, Connell J, Bjorner JB, Carlton J, Taylor Buck E, et al. Recovering Quality of Life (ReQoL): a new generic self-reported outcome measure for use with people experiencing mental health difficulties. *Br J Psychiatry*. 2018;212(1):42-9.
36. Bastien CH, Vallières A, Morin CM. Validation of the Insomnia Severity Index as an outcome measure for insomnia research. *Sleep Med*. 2001;2(4):297-307.
37. Cloitre M, Shevlin M, Brewin CR, Bisson JI, Roberts NP, Maercker A, et al. The International Trauma Questionnaire: development of a self-report measure of ICD-11 PTSD and complex PTSD. *Acta Psychiatr Scand*. 2018;138(6):536-46.
38. Haselgruber A, Sölva K, Lueger-Schuster B. Symptom structure of ICD-11 Complex Posttraumatic Stress Disorder (CPTSD) in trauma-exposed foster children: examining the International Trauma Questionnaire - Child and Adolescent Version (ITQ-CA). *Eur J Psychotraumatol*. 2020;11(1):1818974.
39. Alderson-Day B, Mitrenga K, Wilkinson S, McCarthy-Jones S, Fernyhough C. The varieties of inner speech questionnaire – Revised (VISQ-R): Replicating and refining links between inner speech and psychopathology. *Consciousness and Cognition*. 2018;65:48-58.
40. Bentall RP, Slade PD. Reality testing and auditory hallucinations: a signal detection analysis. *Br J Clin Psychol*. 1985;24 ( Pt 3):159-69.
41. Moseley P, Aleman A, Allen P, Bell V, Bless J, Bortolon C, et al. Correlates of Hallucinatory Experiences in the General Population: An International Multisite Replication Study. *Psychological Science*. 2021;32(7):1024-37.
42. Paulik G, Badcock JC, Maybery MT. Poor intentional inhibition in individuals predisposed to hallucinations. *Cognitive Neuropsychiatry*. 2007;12:457-70.
43. Campbell ML, Morrison AP. The relationship between bullying, psychotic-like experiences and appraisals in 14-16-year olds. *Behav Res Ther*. 2007;45(7):1579-91.
44. Fernyhough C, Bland K, Meins E, Coltheart M. Imaginary companions and young children's responses to ambiguous auditory stimuli: implications for typical and atypical development. *J Child Psychol Psychiatry*. 2007;48(11):1094-101.
45. Andrade J, May J, Deeprouse C, Baugh SJ, Ganis G. Assessing vividness of mental imagery: The Plymouth Sensory Imagery Questionnaire. *Br J Psychol*. 2014;105(4):547-63.
46. Smailes D, Burdis E, Gregoriou C, Fenton B, Dudley R. Pareidolia-proneness, reality discrimination errors, and visual hallucination-like experiences in a non-clinical sample. *Cognitive Neuropsychiatry*. 2020;25:113-25.

- 1  
2  
3 47. Aynsworth C, Nemat N, Collerton D, Smailes D, Dudley R. Reality monitoring performance  
4 and the role of visual imagery in visual hallucinations. *Behaviour Research and Therapy*.  
5 2017;97:115-22.  
6  
7 48. Oei TP, Shuttlewood GJ. Development of a Satisfaction with Therapy and Therapist Scale.  
8 *Aust N Z J Psychiatry*. 1999;33(5):748-53.  
9 49. Oei TPS, Green AL. The Satisfaction With Therapy and Therapist Scale--Revised (STTS-R) for  
10 group psychotherapy: Psychometric properties and confirmatory factor analysis. *Professional*  
11 *Psychology: Research and Practice*. 2008;39(4):435-42.  
12 50. Dudley R, Dodgson G, Common S, O'Grady L, Watson F, Gibbs C, et al. Managing Unusual  
13 Sensory Experiences in People with First-Episode Psychosis (MUSE FEP): a study protocol for a single-  
14 blind parallel-group randomised controlled feasibility trial. *BMJ Open*. 2022;12(5):e061827.  
15 51. Higgins JPT, Green S. *Cochrane handbook for systematic reviews of interventions*: John Wiley  
16 & Sons; 2011.  
17 52. Schulz KF, Altman DG, Moher D, the CG. CONSORT 2010 Statement: updated guidelines for  
18 reporting parallel group randomised trials. *BMC Medicine*. 2010;8(1):18.  
19 53. Teare MD, Dimairo M, Shephard N, Hayman A, Whitehead A, Walters SJ. Sample size  
20 requirements to estimate key design parameters from external pilot randomised controlled trials: a  
21 simulation study. *Trials*. 2014;15(1):264.  
22 54. Braun V, Clarke V. Using thematic analysis in psychology. *Qualitative research in psychology*.  
23 2006;3:77-101.  
24  
25  
26  
27  
28  
29  
30  
31  
32  
33  
34  
35  
36  
37  
38  
39  
40  
41  
42  
43  
44  
45  
46  
47  
48  
49  
50  
51  
52  
53  
54  
55  
56  
57  
58  
59  
60

1  
2  
3  
4  
5  
6  
7  
8  
9  
10  
11  
12  
13  
14  
15  
16  
17  
18  
19  
20  
21  
22  
23  
24  
25  
26  
27  
28  
29  
30  
31  
32  
33  
34  
35  
36  
37  
38  
39  
40  
41  
42  
43  
44  
45  
46  
47  
48  
49  
50  
51  
52  
53  
54  
55  
56  
57  
58  
59  
60

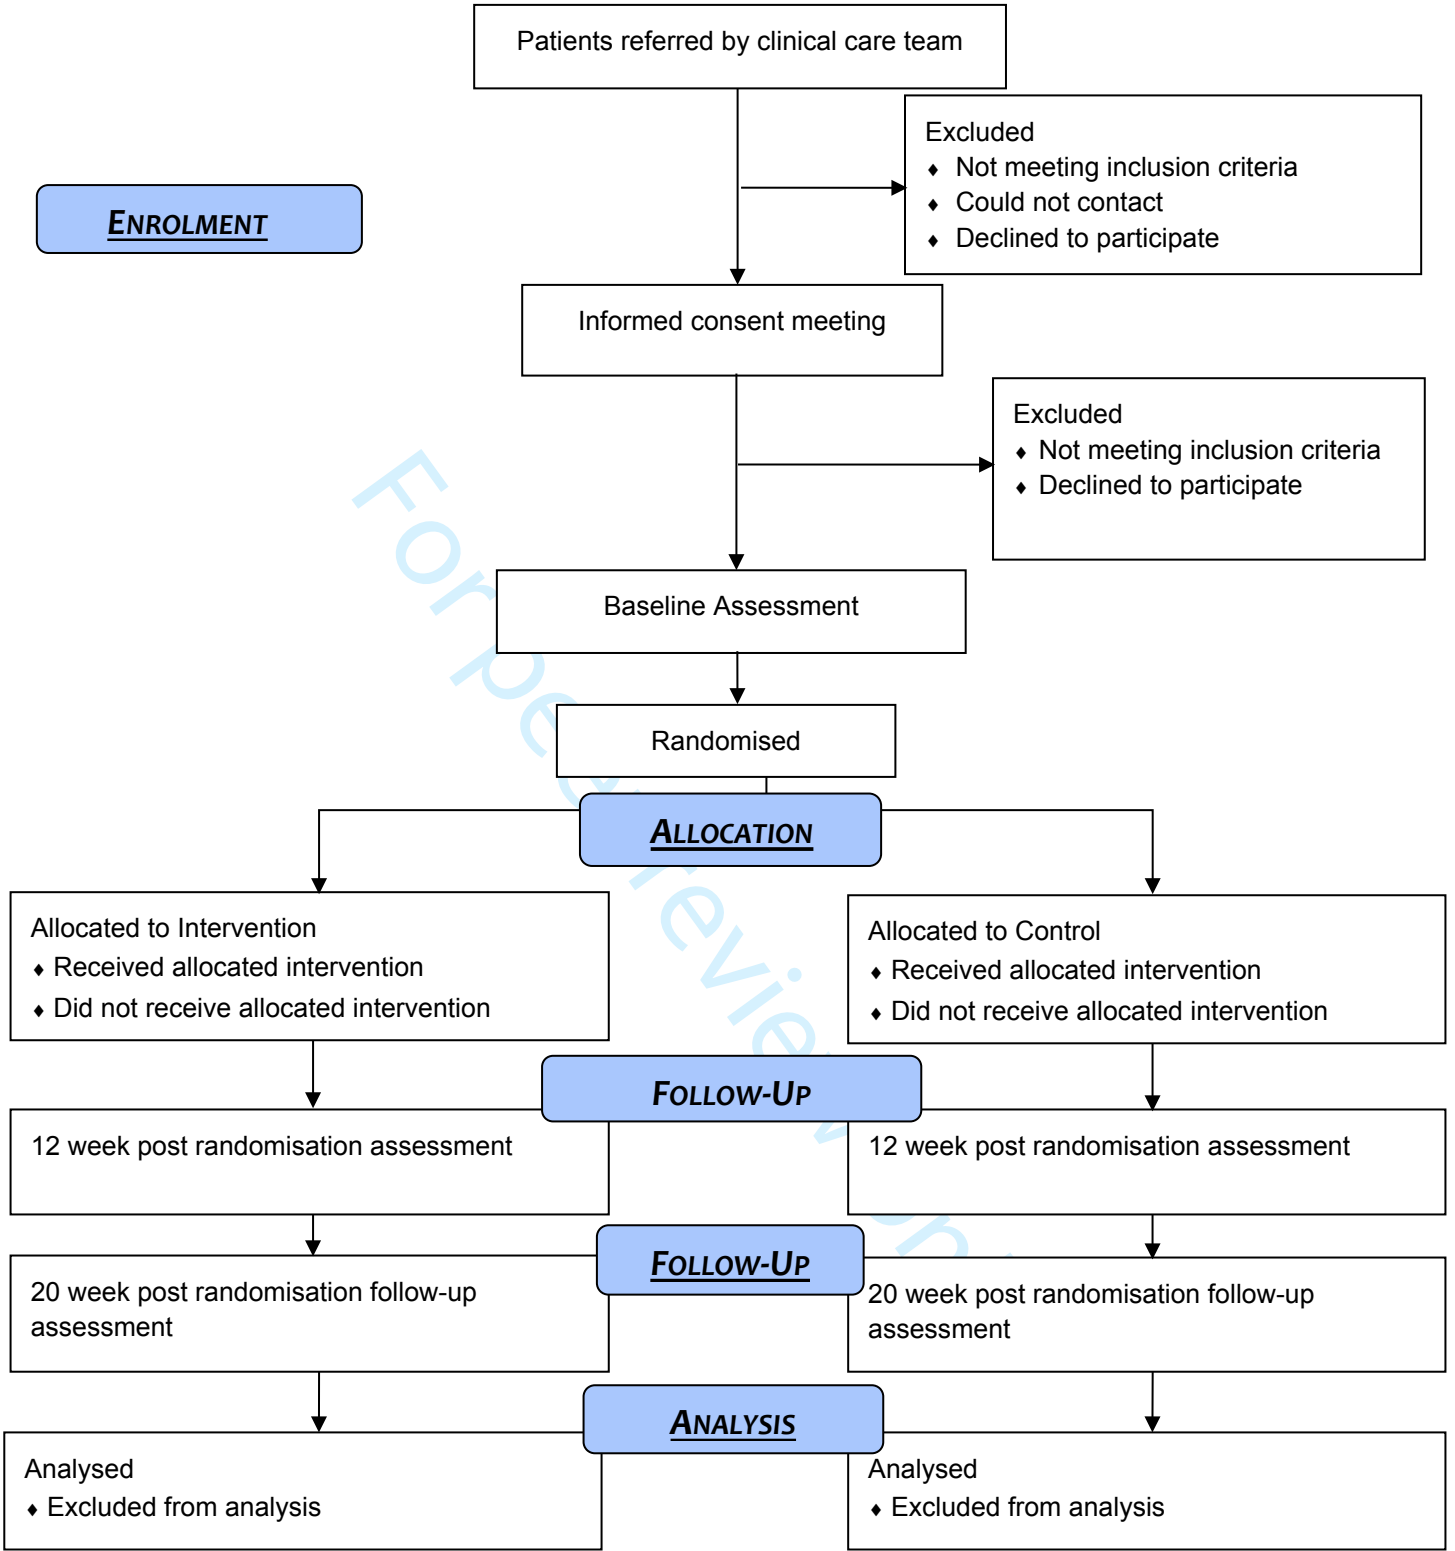

**Table 2. Approved trial monitoring and progression criteria to a future definitive trial**

| Criterion                      | Critical feasibility outcome                                                                                                                              | Other feasibility and acceptability data relevant to the criterion                                                                                                                                                                                               |                                                                                                                                                                                                                                                                         | Proposed thresholds on critical outcome                                                                                                                                                                                                                                                                                                                                                                                                                                                                                                                                                                                                              |
|--------------------------------|-----------------------------------------------------------------------------------------------------------------------------------------------------------|------------------------------------------------------------------------------------------------------------------------------------------------------------------------------------------------------------------------------------------------------------------|-------------------------------------------------------------------------------------------------------------------------------------------------------------------------------------------------------------------------------------------------------------------------|------------------------------------------------------------------------------------------------------------------------------------------------------------------------------------------------------------------------------------------------------------------------------------------------------------------------------------------------------------------------------------------------------------------------------------------------------------------------------------------------------------------------------------------------------------------------------------------------------------------------------------------------------|
| 1) <b>Recruitment</b>          | <ul style="list-style-type: none"> <li>Number of participants consented into the trial and randomised</li> </ul>                                          | <ul style="list-style-type: none"> <li>Number of referrals per month</li> <li>Source of recruitment</li> <li>Number of participants eligible,</li> <li>Number of participants referred</li> <li>Reasons for non-eligibility or withdrawal of interest</li> </ul> | <br><br>       | <p>Feasibility will be demonstrated where an average of least 7.84 participants are recruited and randomised per month (80% of recruitment target met).</p> <p>If at least 5.88 participants are recruited per month, then a future trial will be feasible but additional strategies must be identified to support recruitment (e.g. informed by other feasibility data relevant to this criterion) (60-80% of recruitment target met).</p> <p>If an average of under 5.88 participant is recruited per month over the recruitment period, feasibility within the current design will not be demonstrated (under 60% of recruitment target met).</p> |
| 2) <b>Therapy engagement</b>   | <ul style="list-style-type: none"> <li>% who drop-out of therapy</li> </ul>                                                                               | <ul style="list-style-type: none"> <li>Session record forms for each therapy session</li> <li>Number of therapy sessions attended</li> <li>Qualitative interviews with SU participants</li> <li>Therapy satisfaction scores</li> </ul>                           | <br><br>       | <p>Feasibility will be demonstrated if at least 80% of the participants in the intervention arm completed at least 4 out of the 6-8 sessions of MUSE.</p> <p>If 60-80% of participants in the intervention arm complete at least 4 out of the 6-8 sessions of MUSE.</p> <p>If less than 60% of participants in the intervention arm complete at least 4 out of the 6-8 sessions of MUSE.</p>                                                                                                                                                                                                                                                         |
| 3) <b>Assessment retention</b> | <ul style="list-style-type: none"> <li>% of participants who are lost to follow-up at primary assessment endpoint (12weeks post randomisation)</li> </ul> | <ul style="list-style-type: none"> <li>Reasons for withdrawal from the study</li> <li>Qualitative interviews with SU participants</li> <li>Data completion</li> </ul>                                                                                            | <br><br>       | <p>If at least 70% of participants complete primary outcome measure at primary assessment endpoint, feasibility will be demonstrated.</p> <p>If 50-70% of participants complete primary outcome measure at primary assessment endpoint, a future trial will be feasible if strategies to overcome barriers are identified (e.g. via other data relevant to this).</p> <p>If less than 50% of participants complete primary outcome measure at primary assessment endpoint, feasibility within the current design will not be demonstrated.</p>                                                                                                       |
| 4) <b>Therapy fidelity</b>     | <ul style="list-style-type: none"> <li>Adherence ratings from therapy tapes</li> </ul>                                                                    | <ul style="list-style-type: none"> <li>Session record form for each therapy session (including reasons for deviation from protocol)</li> </ul>                                                                                                                   | <br><br>     | <p>Feasibility will be demonstrated if over 80% of rated therapy tapes are rated as acceptable.</p> <p>If 50-80% of rated therapy tapes are rated as acceptable, a future trial will be feasible if strategies to overcome barriers are identified</p> <p>If less than 50% of rated therapy tapes will be rates as acceptable, feasibility within the current design will not be demonstrated.</p>                                                                                                                                                                                                                                                   |
| 5) <b>Safety</b>               | <ul style="list-style-type: none"> <li>Number of related SAEs</li> </ul>                                                                                  | <ul style="list-style-type: none"> <li>Increased number of AEs in Intervention condition</li> </ul>                                                                                                                                                              | <br><br> | <p>0-1 Related SAEs in the Intervention arm.</p> <p>2 Related SAEs in the Intervention arm.</p> <p>3+ Related SAEs in the Intervention arm.</p>                                                                                                                                                                                                                                                                                                                                                                                                                                                                                                      |



1  
2  
3  
4  
5  
6  
7  
8  
9  
10  
11  
12  
13  
14  
15  
16  
17  
18  
19  
20  
21  
22  
23  
24  
25  
26  
27  
28  
29  
30  
31  
32  
33  
34  
35  
36  
37  
38  
39  
40  
41  
42  
43  
44  
45  
46

For peer review only

MUSE ARMS Feasibility Trial: Preferences Questionnaire; v1.0, 12.03.2023  
IRAS Project ID: 323903

### Preferences for psychological therapy or support

This set of questions is seeking to develop an understanding of your preferences for therapy treatment.

1. Do you have a preference for the number of therapy sessions you might get?

- 1-3
- 4-8
- 9-16
- 17-30
- Don't know

2. How important is it that your treatment:

Includes being give medication?

- Not important
- Somewhat important
- Very important

Includes a talking therapy?

- Not important
- Somewhat important
- Very important

Addresses any feelings of anxiety?

- Not important
- Somewhat important
- Very important

MUSE ARMS Feasibility Trial: Preferences Questionnaire; v1.0, 12.03.2023  
IRAS Project ID: 323903

Addresses any feeling of low mood?

- Not important
- Somewhat important
- Very important

Helps you understand the causes of any unusual sensory experiences, such as hearing a voice?

- Not important
- Somewhat important
- Very important

Helps you learn to manage any unusual sensory experiences?

- Not important
- Somewhat important
- Very important

Helps you feel less distressed about any unusual sensory experiences?

- Not important
- Somewhat important
- Very important

3. What are your preferences for the way the therapist/clinical care team works with you?

Please rate how important you think the following statements are:

I am given space to talk and feel heard

- Not important
- Somewhat important
- Very important

MUSE ARMS Feasibility Trial: Preferences Questionnaire; v1.0, 12.03.2023  
IRAS Project ID: 323903

I work with my therapist to help me make sense of my experiences

- Not important
- Somewhat important
- Very important

I am involved in setting my own goals

- Not important
- Somewhat important
- Very important

I am given new ideas of how to cope with my experiences

- Not important
- Somewhat important
- Very important

4. How much do you hope to get the MUSE therapy?

- I would prefer to be allocated to MUSE based therapy
- I don't mind one way or the other whether I receive MUSE based therapy
- I would prefer to be allocated to the treatment as usual.

1  
2  
3  
4  
5  
6  
7  
8  
9  
10  
11  
12  
13  
14  
15  
16  
17  
18  
19  
20  
21  
22  
23  
24  
25  
26  
27  
28  
29  
30  
31  
32  
33  
34  
35  
36  
37  
38  
39  
40  
41  
42  
43  
44  
45  
46  
47  
48  
49  
50  
51  
52  
53  
54  
55  
56  
57  
58  
59  
60

# MUSE THERAPY THERAPIST PACK

\*Return to research site file for archiving after completion

**Adherence Checklist: MUSE Therapy Sessions**  
(Please tick topic used in any session)

|                                        |           |           |           |           |           |           |           |           |                 |
|----------------------------------------|-----------|-----------|-----------|-----------|-----------|-----------|-----------|-----------|-----------------|
| Insert Date:                           |           |           |           |           |           |           |           |           |                 |
| Insert length of session (minutes):    |           |           |           |           |           |           |           |           |                 |
| <b>Module/Topic</b>                    | <b>S1</b> | <b>S2</b> | <b>S3</b> | <b>S4</b> | <b>S5</b> | <b>S6</b> | <b>S7</b> | <b>S8</b> | <b>Comments</b> |
| <b>What are voices?</b>                |           |           |           |           |           |           |           |           |                 |
| What are voices?                       |           |           |           |           |           |           |           |           |                 |
| How many people hear voices?           |           |           |           |           |           |           |           |           |                 |
| Why does it become a problem?          |           |           |           |           |           |           |           |           |                 |
| Can things get better?                 |           |           |           |           |           |           |           |           |                 |
| Personal experiences                   |           |           |           |           |           |           |           |           |                 |
| <b>1. How the mind works?</b>          |           |           |           |           |           |           |           |           |                 |
| Thoughts and senses                    |           |           |           |           |           |           |           |           |                 |
| How thoughts work                      |           |           |           |           |           |           |           |           |                 |
| Embarrassing thoughts                  |           |           |           |           |           |           |           |           |                 |
| The power of attention                 |           |           |           |           |           |           |           |           |                 |
| How we use expectation                 |           |           |           |           |           |           |           |           |                 |
| <b>2. Assessment</b>                   |           |           |           |           |           |           |           |           |                 |
| Types of unusual sensory experiences.  |           |           |           |           |           |           |           |           |                 |
| What kind of voices do we hear?        |           |           |           |           |           |           |           |           |                 |
| <b>3. Inner Speech</b>                 |           |           |           |           |           |           |           |           |                 |
| What is inner speech?                  |           |           |           |           |           |           |           |           |                 |
| Our inner speech can do amazing things |           |           |           |           |           |           |           |           |                 |
| Why do people not recognise voices?    |           |           |           |           |           |           |           |           |                 |
| Thoughts are hard to control           |           |           |           |           |           |           |           |           |                 |
| Blocking the loop                      |           |           |           |           |           |           |           |           |                 |
| Inner speech – what is the evidence?   |           |           |           |           |           |           |           |           |                 |
| Tracking the self – Was that me?       |           |           |           |           |           |           |           |           |                 |
| Writers and voice hearing              |           |           |           |           |           |           |           |           |                 |
| Imaginary friends                      |           |           |           |           |           |           |           |           |                 |
| Formulation                            |           |           |           |           |           |           |           |           |                 |
| Voices and Relationships               |           |           |           |           |           |           |           |           |                 |
| Transforming the voice                 |           |           |           |           |           |           |           |           |                 |
| Testing out your explanations          |           |           |           |           |           |           |           |           |                 |

**Completed by**

|                                  |             |       |            |                                  |
|----------------------------------|-------------|-------|------------|----------------------------------|
| Participant ID (MUSE ID Number): | Print Name: | Role: | Signature: | <b>Completed on (DD/MM/YYYY)</b> |
|----------------------------------|-------------|-------|------------|----------------------------------|



**Adverse Events Checklist**

|                                                                        |           |           |           |           |           |           |           |           |                 |
|------------------------------------------------------------------------|-----------|-----------|-----------|-----------|-----------|-----------|-----------|-----------|-----------------|
| Insert date:                                                           |           |           |           |           |           |           |           |           |                 |
|                                                                        | <b>S1</b> | <b>S2</b> | <b>S3</b> | <b>S4</b> | <b>S5</b> | <b>S6</b> | <b>S7</b> | <b>S8</b> | <b>Comments</b> |
| <b>Adverse events of interest reported?</b><br><b>Add to Rio/Paris</b> |           |           |           |           |           |           |           |           |                 |
| <b>Serious Adverse Event? NB 24hour reporting deadline</b>             |           |           |           |           |           |           |           |           |                 |
| <b>Urgent Safety Measures? NB Phone PI immediately</b>                 |           |           |           |           |           |           |           |           |                 |

**Adverse Events Guidance:**

Adverse Events. Record on Rio/Paris for collection by the Unblinded Researcher at the 12wk and 20wk assessment time points that pertain to the following events of Protocol Interest:

- Clinically significant increases in distress and/or psychosis
- Increased harm to self/harm to others
- Increased suicidal ideation/attempts
- Increased use of drugs/alcohol
- Emergency room visits for mental health concerns
- Access to crises services

**Serious Adverse Event (SAE):** The site Principal Investigator (PI), or delegate shall report all SAEs within 24 hours of becoming aware of the event to the Chief Investigator (CI), or delegate via email to [MUSE.ARMS@cntw.nhs.uk](mailto:MUSE.ARMS@cntw.nhs.uk) using the SAE reporting form. These are events that:

- results in death;
- is life-threatening;
- requires hospitalisation or prolongation of existing hospitalisation;
- results in persistent or significant disability or incapacity;
- consists of a congenital anomaly or birth defect; or,
- is otherwise considered medically significant by the investigator.

**Urgent Safety Measures:** The site Principal Investigator (PI), or delegate, must inform the CI immediately by telephone (Tel. 01670844670 / alternatively Teams video/voice call for [guy.dodgson@cntw.nhs.uk](mailto:guy.dodgson@cntw.nhs.uk)) of urgent safety measures defined above in section 11.5 (early withdrawal/changes to procedure due to safety concerns for staff or participants). This information shall be documented on the Urgent safety reporting form and submitted by email to [MUSE.ARMS@cntw.nhs.uk](mailto:MUSE.ARMS@cntw.nhs.uk). This is when the following applies:

- Early withdrawal of participant(s) due to safety concerns about the intervention or assessments
- Changes to procedures due to concerns about staff or participant safety

**Transition to Psychosis Checklist**

|                                                                               |           |           |           |           |           |           |           |           |                 |
|-------------------------------------------------------------------------------|-----------|-----------|-----------|-----------|-----------|-----------|-----------|-----------|-----------------|
| Insert date:                                                                  |           |           |           |           |           |           |           |           |                 |
|                                                                               | <b>S1</b> | <b>S2</b> | <b>S3</b> | <b>S4</b> | <b>S5</b> | <b>S6</b> | <b>S7</b> | <b>S8</b> | <b>Comments</b> |
| <b>Indication of Transition to Psychosis?</b><br><b>Add note to Rio/Paris</b> |           |           |           |           |           |           |           |           |                 |

**Transition to Psychosis Guidance:** The following information suggests potential transition to psychosis for this protocol:

- Clinical diagnosis using standard diagnostic classification systems DSM/ICD
- Clinical diagnosis using ARMS assessment schedule documented in clinical notes
- Transfer to the Early Intervention in Psychosis pathway
- Treated or untreated psychotic episode of one week's duration or longer
- Initiation of treatment with antipsychotics (3 or more weeks of treatment with antipsychotics at a dose of ≥ 5mg haloperidol or equivalent)

**Completed by**

|                                  |             |       |            |                           |
|----------------------------------|-------------|-------|------------|---------------------------|
| Participant ID (MUSE ID Number): | Print Name: | Role: | Signature: | Completed on (DD/MM/YYYY) |
|----------------------------------|-------------|-------|------------|---------------------------|





1 **Therapy Session measure**

2 **MUSE Therapist Pack**

MUSE ARMS Feasibility Trial; IRAS ID: 323903

3  
4  
5  
6 Session Number:

7  
8 Date:

9  
10 **Therapy Session measure**

11  
12  
13 **Please answer the following questions about the voices you experienced in the past week**

14  
15 How frequent were the voices?

16  
17 0% 10 20 30 40 50 60 70 80 90 100%  
18 Voices not present Once a day Voices always present

19  
20  
21  
22 Were the voices distressing? How much of the time?

23  
24 0% 10 20 30 40 50 60 70 80 90 100%  
25 Voices never distressing Voices were distressing about half of the times Voices always distressing

26  
27  
28  
29  
30 **If relevant please answer the following questions about the visions you experienced in the past week**

31  
32 How frequent were the visions?

33  
34  
35 0% 10 20 30 40 50 60 70 80 90 100%  
36 Visions not present Once a day Visions always present

37  
38  
39  
40 Were the vision distressing? How much of the time?

41  
42 0% 10 20 30 40 50 60 70 80 90 100%  
43 Visions never distressing Moderately distressing extremely distressing

44  
45  
46  
47 Overall, how distressing were the experiences listed above?

48  
49 0% 10 20 30 40 50 60 70 80 90 100%  
50 not at all distressing Moderately distressing extremely distressing

51  
52  
53  
54  
55  
56  
57  
58  
59 **Completed by**

|                                  |             |       |            |                           |
|----------------------------------|-------------|-------|------------|---------------------------|
| Participant ID (MUSE ID Number): | Print Name: | Role: | Signature: | Completed on (DD/MM/YYYY) |
|----------------------------------|-------------|-------|------------|---------------------------|







1 **Therapy Session measure**

2 **MUSE Therapist Pack**

MUSE ARMS Feasibility Trial; IRAS ID: 323903

3  
4  
5  
6 Session Number:

7  
8 Date:

9  
10 **Therapy Session measure**

11  
12  
13 **Please answer the following questions about the voices you experienced in the past week**

14 How frequent were the voices?

15  
16  
17 0% 10 20 30 40 50 60 70 80 90 100%  
18 Voices not present Once a day Voices always present

19  
20  
21  
22 Were the voices distressing? How much of the time?

23  
24 0% 10 20 30 40 50 60 70 80 90 100%  
25 Voices never distressing Voices were distressing about half of the times Voices always distressing

26  
27  
28  
29 **If relevant please answer the following questions about the visions you experienced in the past week**

30 How frequent were the visions?

31  
32  
33  
34  
35 0% 10 20 30 40 50 60 70 80 90 100%  
36 Visions not present Once a day Visions always present

37  
38  
39  
40 Were the vision distressing? How much of the time?

41  
42 0% 10 20 30 40 50 60 70 80 90 100%  
43 Visions never distressing Moderately distressing extremely distressing

44  
45  
46  
47 Overall, how distressing were the experiences listed above?

48  
49 0% 10 20 30 40 50 60 70 80 90 100%  
50 not at all distressing Moderately distressing extremely distressing

51  
52  
53  
54  
55  
56  
57  
58  
59 **Completed by**

|                                  |             |       |            |                           |
|----------------------------------|-------------|-------|------------|---------------------------|
| Participant ID (MUSE ID Number): | Print Name: | Role: | Signature: | Completed on (DD/MM/YYYY) |
|----------------------------------|-------------|-------|------------|---------------------------|



1 **Therapy Session measure**

2 **MUSE Therapist Pack**

MUSE ARMS Feasibility Trial; IRAS ID: 323903

3  
4  
5  
6 Session Number:

7  
8 Date:

9  
10 **Therapy Session measure**

11  
12  
13 **Please answer the following questions about the voices you experienced in the past week**

14  
15 How frequent were the voices?

16  
17 0% 10 20 30 40 50 60 70 80 90 100%  
18 Voices not present Once a day Voices always present

19  
20  
21  
22 Were the voices distressing? How much of the time?

23  
24 0% 10 20 30 40 50 60 70 80 90 100%  
25 Voices never distressing Voices were distressing about half of the times Voices always distressing

26  
27  
28  
29  
30 **If relevant please answer the following questions about the visions you experienced in the past week**

31  
32 How frequent were the visions?

33  
34  
35 0% 10 20 30 40 50 60 70 80 90 100%  
36 Visions not present Once a day Visions always present

37  
38  
39  
40 Were the vision distressing? How much of the time?

41  
42 0% 10 20 30 40 50 60 70 80 90 100%  
43 Visions never distressing Moderately distressing extremely distressing

44  
45  
46  
47 Overall, how distressing were the experiences listed above?

48  
49 0% 10 20 30 40 50 60 70 80 90 100%  
50 not at all distressing Moderately distressing extremely distressing

51  
52  
53  
54  
55  
56  
57  
58  
59 **Completed by**

|                                  |             |       |            |                           |
|----------------------------------|-------------|-------|------------|---------------------------|
| Participant ID (MUSE ID Number): | Print Name: | Role: | Signature: | Completed on (DD/MM/YYYY) |
|----------------------------------|-------------|-------|------------|---------------------------|



1  
2  
3  
4  
5  
6  
7  
8  
9  
10  
11  
12  
13  
14  
15  
16  
17  
18  
19  
20  
21  
22  
23  
24  
25  
26  
27  
28  
29  
30  
31  
32  
33  
34  
35  
36  
37  
38  
39  
40  
41  
42  
43  
44  
45  
46  
47  
48  
49  
50  
51  
52  
53  
54  
55  
56  
57  
58  
59  
60

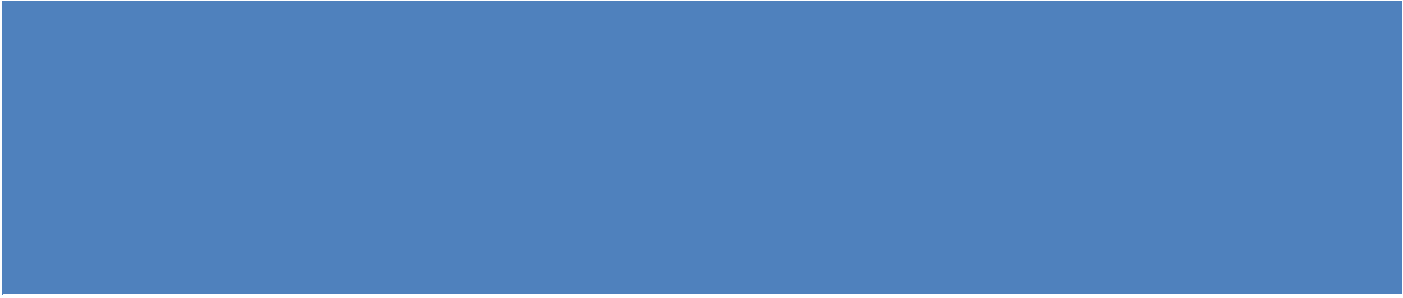

# TAU THERAPY THERAPIST PACK

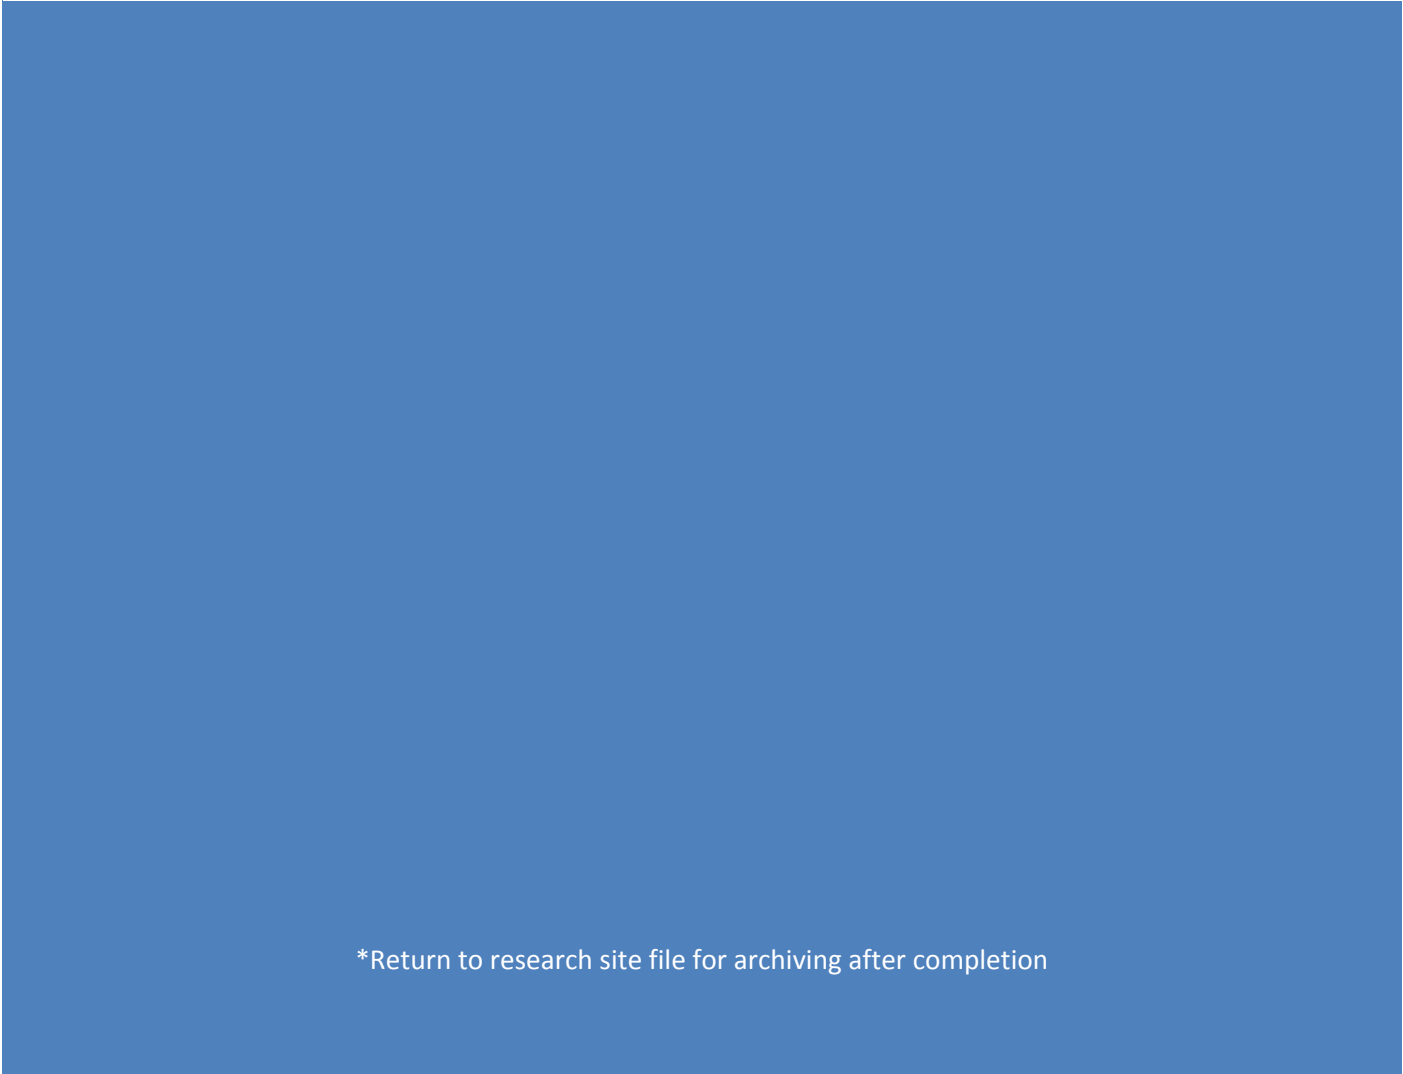

\*Return to research site file for archiving after completion

**Adherence Checklist: TAU Therapy Sessions**  
 (Please tick for used in any session)

|                                                                                                                    |    |    |    |    |    |    |    |    |          |
|--------------------------------------------------------------------------------------------------------------------|----|----|----|----|----|----|----|----|----------|
| Insert Date:                                                                                                       |    |    |    |    |    |    |    |    |          |
| Insert length of session (minutes):                                                                                |    |    |    |    |    |    |    |    |          |
|                                                                                                                    | S1 | S2 | S3 | S4 | S5 | S6 | S7 | S8 | Comments |
| Was this a CBT session (Y/N)?                                                                                      |    |    |    |    |    |    |    |    |          |
| CBT Assessment                                                                                                     |    |    |    |    |    |    |    |    |          |
| Formulation                                                                                                        |    |    |    |    |    |    |    |    |          |
| Needs based emotional support                                                                                      |    |    |    |    |    |    |    |    |          |
| Social Support                                                                                                     |    |    |    |    |    |    |    |    |          |
| Normalisation                                                                                                      |    |    |    |    |    |    |    |    |          |
| Stress management                                                                                                  |    |    |    |    |    |    |    |    |          |
| Psychoeducation*<br><i>*Please describe if related to managing unusual sensory experiences in the comments box</i> |    |    |    |    |    |    |    |    |          |
| Other:                                                                                                             |    |    |    |    |    |    |    |    |          |
| Other:                                                                                                             |    |    |    |    |    |    |    |    |          |
| Other:                                                                                                             |    |    |    |    |    |    |    |    |          |

**Completed by**

|                                  |             |       |            |                           |
|----------------------------------|-------------|-------|------------|---------------------------|
| Participant ID (MUSE ID Number): | Print Name: | Role: | Signature: | Completed on (DD/MM/YYYY) |
|----------------------------------|-------------|-------|------------|---------------------------|

## Adverse Events Checklist

| Insert date:                                                    |    |    |    |    |    |    |    |    |          |  |
|-----------------------------------------------------------------|----|----|----|----|----|----|----|----|----------|--|
|                                                                 | S1 | S2 | S3 | S4 | S5 | S6 | S7 | S8 | Comments |  |
| Adverse events of interest reported?<br><b>Add to Rio/Paris</b> |    |    |    |    |    |    |    |    |          |  |
| Serious Adverse Event? <b>NB 24hour reporting deadline</b>      |    |    |    |    |    |    |    |    |          |  |
| Urgent Safety Measures? <b>NB Phone PI immediately</b>          |    |    |    |    |    |    |    |    |          |  |

Adverse Events Guidance:

**Adverse Events. Record on Rio/Paris for collection by the Unblinded Researcher at the 12wk and 20wk assessment time points that pertain to the following events of Protocol Interest:**

- Clinically significant increases in distress and/or psychosis
- Increased harm to self/harm to others
- Increased suicidal ideation/attempts
- Increased use of drugs/alcohol
- Emergency room visits for mental health concerns
- Access to crises services

**Serious Adverse Event (SAE):** The site Principal Investigator (PI), or delegate shall report all SAEs within 24 hours of becoming aware of the event to the Chief Investigator (CI), or delegate via email to [MUSE.ARMS@cntw.nhs.uk](mailto:MUSE.ARMS@cntw.nhs.uk) using the SAE reporting form. These are events that:

- results in death;
- is life-threatening;
- requires hospitalisation or prolongation of existing hospitalisation;
- results in persistent or significant disability or incapacity;
- consists of a congenital anomaly or birth defect; or,
- is otherwise considered medically significant by the investigator.

**Urgent Safety Measures:** The site Principal Investigator (PI), or delegate, must inform the CI immediately by telephone (Tel. 01670844670 / alternatively Teams video/voice call for [guy.dodgson@cntw.nhs.uk](mailto:guy.dodgson@cntw.nhs.uk)) of urgent safety measures defined above in section 11.5 (early withdrawal/changes to procedure due to safety concerns for staff or participants). This information shall be documented on the Urgent safety reporting form and submitted by email to [MUSE.ARMS@cntw.nhs.uk](mailto:MUSE.ARMS@cntw.nhs.uk). This is when the following applies:

- Early withdrawal of participant(s) due to safety concerns about the intervention or assessments
- Changes to procedures due to concerns about staff or participant safety

## Transition to Psychosis Checklist

| Insert date:                                                           |    |    |    |    |    |    |    |    |          |  |
|------------------------------------------------------------------------|----|----|----|----|----|----|----|----|----------|--|
|                                                                        | S1 | S2 | S3 | S4 | S5 | S6 | S7 | S8 | Comments |  |
| Indication of Transition to Psychosis?<br><b>Add note to Rio/Paris</b> |    |    |    |    |    |    |    |    |          |  |

Transition to Psychosis Guidance: The following information suggests potential transition to psychosis for this protocol:

- Clinical diagnosis using standard diagnostic classification systems DSM/ICD
- Clinical diagnosis using ARMS assessment schedule documented in clinical notes
- Transfer to the Early Intervention in Psychosis pathway
- Treated or untreated psychotic episode of one week's duration or longer
- Initiation of treatment with antipsychotics (3 or more weeks of treatment with antipsychotics at a dose of  $\geq 5$ mg haloperidol or equivalent)

**Completed by**

|                                  |             |       |            |                           |
|----------------------------------|-------------|-------|------------|---------------------------|
| Participant ID (MUSE ID Number): | Print Name: | Role: | Signature: | Completed on (DD/MM/YYYY) |
|----------------------------------|-------------|-------|------------|---------------------------|

1  
2  
3  
4  
5  
6  
7  
8  
9  
10  
11  
12  
13  
14  
15  
16  
17  
18  
19  
20  
21  
22  
23  
24  
25  
26  
27  
28  
29  
30  
31  
32  
33  
34  
35  
36  
37  
38  
39  
40  
41  
42  
43  
44  
45  
46  
47  
48  
49  
50  
51  
52  
53  
54  
55  
56  
57  
58  
59  
60

For peer review only

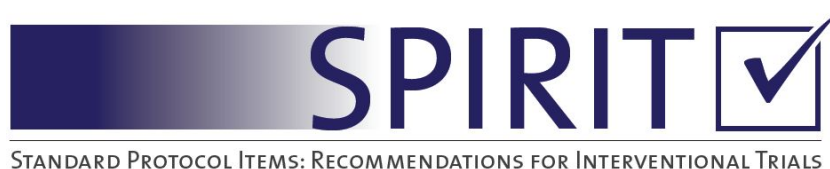

STANDARD PROTOCOL ITEMS: RECOMMENDATIONS FOR INTERVENTIONAL TRIALS

SPIRIT 2013 Checklist: Recommended items to address in a clinical trial protocol and related documents\*

| Section/item                      | Item No | Description                                                                                                                                                                                                                                                                              |                                     |
|-----------------------------------|---------|------------------------------------------------------------------------------------------------------------------------------------------------------------------------------------------------------------------------------------------------------------------------------------------|-------------------------------------|
| <b>Administrative information</b> |         |                                                                                                                                                                                                                                                                                          |                                     |
| Title                             | 1       | Descriptive title identifying the study design, population, interventions, and, if applicable, trial acronym                                                                                                                                                                             | <input checked="" type="checkbox"/> |
| Trial registration                | 2a      | Trial identifier and registry name. If not yet registered, name of intended registry                                                                                                                                                                                                     | <input checked="" type="checkbox"/> |
|                                   | 2b      | All items from the World Health Organization Trial Registration Data Set                                                                                                                                                                                                                 | <input type="checkbox"/>            |
| Protocol version                  | 3       | Date and version identifier                                                                                                                                                                                                                                                              | <input checked="" type="checkbox"/> |
| Funding                           | 4       | Sources and types of financial, material, and other support                                                                                                                                                                                                                              | <input checked="" type="checkbox"/> |
| Roles and responsibilities        | 5a      | Names, affiliations, and roles of protocol contributors                                                                                                                                                                                                                                  | <input checked="" type="checkbox"/> |
|                                   | 5b      | Name and contact information for the trial sponsor                                                                                                                                                                                                                                       | <input checked="" type="checkbox"/> |
|                                   | 5c      | Role of study sponsor and funders, if any, in study design; collection, management, analysis, and interpretation of data; writing of the report; and the decision to submit the report for publication, including whether they will have ultimate authority over any of these activities | <input checked="" type="checkbox"/> |
|                                   | 5d      | Composition, roles, and responsibilities of the coordinating centre, steering committee, endpoint adjudication committee, data management team, and other individuals or groups overseeing the trial, if applicable (see Item 21a for data monitoring committee)                         | <input checked="" type="checkbox"/> |

|                                                           |     |                                                                                                                                                                                                                                                                                                                                                                                |                                     |
|-----------------------------------------------------------|-----|--------------------------------------------------------------------------------------------------------------------------------------------------------------------------------------------------------------------------------------------------------------------------------------------------------------------------------------------------------------------------------|-------------------------------------|
| <b>Introduction</b>                                       |     |                                                                                                                                                                                                                                                                                                                                                                                |                                     |
| Background and rationale                                  | 6a  | Description of research question and justification for undertaking the trial, including summary of relevant studies (published and unpublished) examining benefits and harms for each intervention                                                                                                                                                                             | <input type="checkbox"/>            |
|                                                           | 6b  | Explanation for choice of comparators                                                                                                                                                                                                                                                                                                                                          | <input checked="" type="checkbox"/> |
| Objectives                                                | 7   | Specific objectives or hypotheses                                                                                                                                                                                                                                                                                                                                              | <input checked="" type="checkbox"/> |
| Trial design                                              | 8   | Description of trial design including type of trial (eg, parallel group, crossover, factorial, single group), allocation ratio, and framework (eg, superiority, equivalence, noninferiority, exploratory)                                                                                                                                                                      | <input checked="" type="checkbox"/> |
| <b>Methods: Participants, interventions, and outcomes</b> |     |                                                                                                                                                                                                                                                                                                                                                                                |                                     |
| Study setting                                             | 9   | Description of study settings (eg, community clinic, academic hospital) and list of countries where data will be collected. Reference to where list of study sites can be obtained                                                                                                                                                                                             | <input checked="" type="checkbox"/> |
| Eligibility criteria                                      | 10  | Inclusion and exclusion criteria for participants. If applicable, eligibility criteria for study centres and individuals who will perform the interventions (eg, surgeons, psychotherapists)                                                                                                                                                                                   | <input checked="" type="checkbox"/> |
| Interventions                                             | 11a | Interventions for each group with sufficient detail to allow replication, including how and when they will be administered                                                                                                                                                                                                                                                     | <input checked="" type="checkbox"/> |
|                                                           | 11b | Criteria for discontinuing or modifying allocated interventions for a given trial participant (eg, drug dose change in response to harms, participant request, or improving/worsening disease)                                                                                                                                                                                 | <input type="checkbox"/>            |
|                                                           | 11c | Strategies to improve adherence to intervention protocols, and any procedures for monitoring adherence (eg, drug tablet return, laboratory tests)                                                                                                                                                                                                                              | <input type="checkbox"/>            |
|                                                           | 11d | Relevant concomitant care and interventions that are permitted or prohibited during the trial                                                                                                                                                                                                                                                                                  | <input type="checkbox"/>            |
| Outcomes                                                  | 12  | Primary, secondary, and other outcomes, including the specific measurement variable (eg, systolic blood pressure), analysis metric (eg, change from baseline, final value, time to event), method of aggregation (eg, median, proportion), and time point for each outcome. Explanation of the clinical relevance of chosen efficacy and harm outcomes is strongly recommended | <input type="checkbox"/>            |

|                                                                     |     |                                                                                                                                                                                                                                                                                                                                                                                                              |                                                                                       |
|---------------------------------------------------------------------|-----|--------------------------------------------------------------------------------------------------------------------------------------------------------------------------------------------------------------------------------------------------------------------------------------------------------------------------------------------------------------------------------------------------------------|---------------------------------------------------------------------------------------|
| Participant timeline                                                | 13  | Time schedule of enrolment, interventions (including any run-ins and washouts), assessments, and visits for participants. A schematic diagram is highly recommended (see Figure)                                                                                                                                                                                                                             |    |
| Sample size                                                         | 14  | Estimated number of participants needed to achieve study objectives and how it was determined, including clinical and statistical assumptions supporting any sample size calculations                                                                                                                                                                                                                        |    |
| Recruitment                                                         | 15  | Strategies for achieving adequate participant enrolment to reach target sample size                                                                                                                                                                                                                                                                                                                          |    |
| <b>Methods: Assignment of interventions (for controlled trials)</b> |     |                                                                                                                                                                                                                                                                                                                                                                                                              |                                                                                       |
| Allocation:                                                         |     |                                                                                                                                                                                                                                                                                                                                                                                                              |                                                                                       |
| Sequence generation                                                 | 16a | Method of generating the allocation sequence (eg, computer-generated random numbers), and list of any factors for stratification. To reduce predictability of a random sequence, details of any planned restriction (eg, blocking) should be provided in a separate document that is unavailable to those who enrol participants or assign interventions                                                     |    |
| Allocation concealment mechanism                                    | 16b | Mechanism of implementing the allocation sequence (eg, central telephone; sequentially numbered, opaque, sealed envelopes), describing any steps to conceal the sequence until interventions are assigned                                                                                                                                                                                                    |    |
| Implementation                                                      | 16c | Who will generate the allocation sequence, who will enrol participants, and who will assign participants to interventions                                                                                                                                                                                                                                                                                    |  |
| Blinding (masking)                                                  | 17a | Who will be blinded after assignment to interventions (eg, trial participants, care providers, outcome assessors, data analysts), and how                                                                                                                                                                                                                                                                    |  |
|                                                                     | 17b | If blinded, circumstances under which unblinding is permissible, and procedure for revealing a participant's allocated intervention during the trial                                                                                                                                                                                                                                                         |  |
| <b>Methods: Data collection, management, and analysis</b>           |     |                                                                                                                                                                                                                                                                                                                                                                                                              |                                                                                       |
| Data collection methods                                             | 18a | Plans for assessment and collection of outcome, baseline, and other trial data, including any related processes to promote data quality (eg, duplicate measurements, training of assessors) and a description of study instruments (eg, questionnaires, laboratory tests) along with their reliability and validity, if known. Reference to where data collection forms can be found, if not in the protocol |  |
|                                                                     | 18b | Plans to promote participant retention and complete follow-up, including list of any outcome data to be collected for participants who discontinue or deviate from intervention protocols                                                                                                                                                                                                                    |  |

|                                              |                                 |     |                                                                                                                                                                                                                                                                                                                                       |                                                                                       |
|----------------------------------------------|---------------------------------|-----|---------------------------------------------------------------------------------------------------------------------------------------------------------------------------------------------------------------------------------------------------------------------------------------------------------------------------------------|---------------------------------------------------------------------------------------|
| 1<br>2<br>3<br>4<br>5<br>6                   | Data management                 | 19  | Plans for data entry, coding, security, and storage, including any related processes to promote data quality (eg, double data entry; range checks for data values). Reference to where details of data management procedures can be found, if not in the protocol                                                                     |    |
| 7<br>8<br>9<br>10<br>11                      | Statistical methods             | 20a | Statistical methods for analysing primary and secondary outcomes. Reference to where other details of the statistical analysis plan can be found, if not in the protocol                                                                                                                                                              |    |
| 12<br>13<br>14                               |                                 | 20b | Methods for any additional analyses (eg, subgroup and adjusted analyses)                                                                                                                                                                                                                                                              |    |
| 15<br>16<br>17<br>18<br>19                   |                                 | 20c | Definition of analysis population relating to protocol non-adherence (eg, as randomised analysis), and any statistical methods to handle missing data (eg, multiple imputation)                                                                                                                                                       |    |
| 20                                           | <b>Methods: Monitoring</b>      |     |                                                                                                                                                                                                                                                                                                                                       |                                                                                       |
| 21<br>22<br>23<br>24<br>25<br>26<br>27<br>28 | Data monitoring                 | 21a | Composition of data monitoring committee (DMC); summary of its role and reporting structure; statement of whether it is independent from the sponsor and competing interests; and reference to where further details about its charter can be found, if not in the protocol. Alternatively, an explanation of why a DMC is not needed |    |
| 29<br>30<br>31<br>32                         |                                 | 21b | Description of any interim analyses and stopping guidelines, including who will have access to these interim results and make the final decision to terminate the trial                                                                                                                                                               |   |
| 33<br>34<br>35<br>36<br>37                   | Harms                           | 22  | Plans for collecting, assessing, reporting, and managing solicited and spontaneously reported adverse events and other unintended effects of trial interventions or trial conduct                                                                                                                                                     |  |
| 38<br>39<br>40<br>41                         | Auditing                        | 23  | Frequency and procedures for auditing trial conduct, if any, and whether the process will be independent from investigators and the sponsor                                                                                                                                                                                           |  |
| 42                                           | <b>Ethics and dissemination</b> |     |                                                                                                                                                                                                                                                                                                                                       |                                                                                       |
| 43<br>44<br>45<br>46<br>47                   | Research ethics approval        | 24  | Plans for seeking research ethics committee/institutional review board (REC/IRB) approval                                                                                                                                                                                                                                             |  |
| 48<br>49<br>50<br>51<br>52                   | Protocol amendments             | 25  | Plans for communicating important protocol modifications (eg, changes to eligibility criteria, outcomes, analyses) to relevant parties (eg, investigators, REC/IRBs, trial participants, trial registries, journals, regulators)                                                                                                      |  |
| 53<br>54<br>55<br>56                         | Consent or assent               | 26a | Who will obtain informed consent or assent from potential trial participants or authorised surrogates, and how (see Item 32)                                                                                                                                                                                                          |  |
| 57<br>58<br>59<br>60                         |                                 | 26b | Additional consent provisions for collection and use of participant data and biological specimens in ancillary studies, if applicable                                                                                                                                                                                                 |  |



|                               |     |                                                                                                                                                                                                                                                                                     |                                                                                   |
|-------------------------------|-----|-------------------------------------------------------------------------------------------------------------------------------------------------------------------------------------------------------------------------------------------------------------------------------------|-----------------------------------------------------------------------------------|
| Confidentiality               | 27  | How personal information about potential and enrolled participants will be collected, shared, and maintained in order to protect confidentiality before, during, and after the trial                                                                                                | <input type="checkbox"/>                                                          |
| Declaration of interests      | 28  | Financial and other competing interests for principal investigators for the overall trial and each study site                                                                                                                                                                       | <input type="checkbox"/>                                                          |
| Access to data                | 29  | Statement of who will have access to the final trial dataset, and disclosure of contractual agreements that limit such access for investigators                                                                                                                                     | <input type="checkbox"/><br>Protocol paper<br>Data management<br>* See Note Below |
| Ancillary and post-trial care | 30  | Provisions, if any, for ancillary and post-trial care, and for compensation to those who suffer harm from trial participation                                                                                                                                                       | <input checked="" type="checkbox"/> IRAS<br><br>NHS Insurance<br>* See Note Below |
| Dissemination policy          | 31a | Plans for investigators and sponsor to communicate trial results to participants, healthcare professionals, the public, and other relevant groups (eg, via publication, reporting in results databases, or other data sharing arrangements), including any publication restrictions | <input type="checkbox"/>                                                          |
|                               | 31b | Authorship eligibility guidelines and any intended use of professional writers                                                                                                                                                                                                      | <input checked="" type="checkbox"/> Protocol Paper – ICMJE<br>* See Note Below    |
|                               | 31c | Plans, if any, for granting public access to the full protocol, participant-level dataset, and statistical code                                                                                                                                                                     | <input type="checkbox"/>                                                          |
| <b>Appendices</b>             |     |                                                                                                                                                                                                                                                                                     |                                                                                   |
| Informed consent materials    | 32  | Model consent form and other related documentation given to participants and authorised surrogates                                                                                                                                                                                  | <input type="checkbox"/>                                                          |
| Biological specimens          | 33  | Plans for collection, laboratory evaluation, and storage of biological specimens for genetic or molecular analysis in the current trial and for future use in ancillary studies, if applicable                                                                                      | N/A                                                                               |

\*It is strongly recommended that this checklist be read in conjunction with the SPIRIT 2013 Explanation & Elaboration for important clarification on the items. Amendments to the protocol should be tracked and dated. The SPIRIT checklist is copyrighted by the SPIRIT Group under the Creative Commons "[Attribution-NonCommercial-NoDerivs 3.0 Unported](https://creativecommons.org/licenses/by-nc-nd/3.0/)" license.

1 \*The SRIRIT checklist has been carefully reviewed against the trial protocol and associated  
2 documentation and the explanation of the protocol in the protocol paper submitted.

3 To provide further explanation on three items where more consideration could be given within the  
4 protocol itself are:  
5

- 6 (i) item 29, refers to a statement of who will have access to the final trial dataset, and  
7 disclosure of contractual agreements that limit such access for investigators. This is an  
8 NIHR funded feasibility trial with no DMEC within its feasibility stage. We do not have  
9 contractual agreements that limit data access, other than to limit access to confidential  
10 information as this is restricted and explained in the participant facing documents. We  
11 have detailed in the protocol paper how data is input, stored, and transferred prior to  
12 analysis to allow for audit and monitoring in accordance with the trial monitoring plan.  
13  
14 (ii) item 30 refers to provisions, if any, for ancillary and post-trial care, and for compensation to  
15 those who suffer harm from trial participation. As this is a psychological therapies trial  
16 there are no biological risks, however we are conscious of the possibility of increased  
17 psychological risks and so we have developed clear safety reporting procedures for  
18 serious adverse events and for urgent safety measures should these arise, which abide by  
19 HRA and UK Research Ethics Committee standard procedures. We have also written  
20 into the protocol procedures for collecting adverse events that do not hit the seriousness  
21 criteria, so that these can be reported in the main outcomes paper. Our research has NHS  
22 insurance and this is clear on the IRAS application document. Any post-trial care would  
23 be standard NHS care;  
24  
25 (iii) item 31b refers to authorship eligibility guidelines and any intended use of professional  
26 writers. We do not use professional writers. We have not written authorship eligibility  
27 into the protocol, however the lead writers for the different papers have been identified  
28 in advance. We have followed the ICMJE recommendations for authorship and have  
29 noted this in the contributors section of the protocol paper.  
30  
31  
32  
33  
34  
35  
36

37 All other items of the SPIRIT checklist are available within the protocol and Research Ethics  
38 Committee approved participant facing documents as appropriate.  
39  
40  
41  
42  
43  
44  
45  
46  
47  
48  
49  
50  
51  
52  
53  
54  
55  
56  
57  
58  
59  
60

CONSORT Abstract Checklist (Clarke et al 2008).

The Abstract has been reviewed in accordance with the CONSORT Abstract Checklist and is in adherence, see below. As this is a protocol paper of a trial open and in its very early stages of data collection, no results are currently available. TheMUSE ARMS Feasibility Trial opened to participants on 14.04.2023.

| Item                       | Description                                                                                                 |   |
|----------------------------|-------------------------------------------------------------------------------------------------------------|---|
| Title                      | Identification of the study as randomised                                                                   | ✓ |
| Authors*                   | Contact details for the corresponding author                                                                | ✓ |
| Trial design               | Description of the trial design (eg, parallel, cluster, non-inferiority)                                    | ✓ |
| <b>Methods</b>             |                                                                                                             |   |
| Participants               | Eligibility criteria for participants and the settings where the data were collected                        | ✓ |
| Interventions              | Interventions intended for each group                                                                       | ✓ |
| Objective                  | Specific objective or hypothesis                                                                            | ✓ |
| Outcome                    | Clearly defined primary outcome for this report                                                             | ✓ |
| Randomisation              | How participants were allocated to interventions                                                            | ✓ |
| Blinding (masking)         | Whether or not participants, care givers, and those assessing the outcomes were blinded to group assignment | ✓ |
| <b>Results</b>             |                                                                                                             |   |
| Numbers randomised         | Number of participants randomised to each group                                                             |   |
| Recruitment                | Trial status                                                                                                |   |
| Numbers analysed           | Number of participants analysed in each group                                                               |   |
| Outcome                    | For the primary outcome, a result for each group and the estimated effect size and its precision            |   |
| Harms                      | Important adverse events or side-effects                                                                    |   |
| Conclusions                | General interpretation of the results                                                                       |   |
| Trial registration         | Registration number and name of trial register                                                              | ✓ |
| Funding                    | Source of funding                                                                                           | ✓ |
| *For conference abstracts. |                                                                                                             |   |

Reference:

**CONSORT for reporting randomised trials in journal and conference abstracts**

Clarke, Mike; Moher, David; Wager, Elizabeth; Middleton, Philippa; Altman, Douglas G; Schulz, Kenneth F  
*The Lancet*; Jan 26-Feb 1, 2008; 371, 9609; ProQuest  
 pg. 281

# BMJ Open

## Use of a targeted, computer/web-based guided self-help psychoeducation toolkit for distressing hallucinations (MUSE) in people with an At Risk Mental State for psychosis: protocol for a randomised controlled feasibility trial

|                                 |                                                                                                                                                                                                                                                                                                                                                                                                                                                                                                                                                                                                                                                                                                                                                                                                                                                                                                                                                                                                                                                                              |
|---------------------------------|------------------------------------------------------------------------------------------------------------------------------------------------------------------------------------------------------------------------------------------------------------------------------------------------------------------------------------------------------------------------------------------------------------------------------------------------------------------------------------------------------------------------------------------------------------------------------------------------------------------------------------------------------------------------------------------------------------------------------------------------------------------------------------------------------------------------------------------------------------------------------------------------------------------------------------------------------------------------------------------------------------------------------------------------------------------------------|
| Journal:                        | <i>BMJ Open</i>                                                                                                                                                                                                                                                                                                                                                                                                                                                                                                                                                                                                                                                                                                                                                                                                                                                                                                                                                                                                                                                              |
| Manuscript ID                   | bmjopen-2023-076101.R1                                                                                                                                                                                                                                                                                                                                                                                                                                                                                                                                                                                                                                                                                                                                                                                                                                                                                                                                                                                                                                                       |
| Article Type:                   | Protocol                                                                                                                                                                                                                                                                                                                                                                                                                                                                                                                                                                                                                                                                                                                                                                                                                                                                                                                                                                                                                                                                     |
| Date Submitted by the Author:   | 12-Jun-2023                                                                                                                                                                                                                                                                                                                                                                                                                                                                                                                                                                                                                                                                                                                                                                                                                                                                                                                                                                                                                                                                  |
| Complete List of Authors:       | Hamilton, Jahnese; Cumbria Northumberland Tyne and Wear NHS Foundation Trust, Research and Development; Newcastle University<br>Arnott, Bronia; Newcastle University<br>Aynsworth, Charlotte; Cumbria Northumberland Tyne and Wear NHS Foundation Trust<br>Barclay, Nicola; Cumbria Northumberland Tyne and Wear NHS Foundation Trust, Central At-Risk Mental State Service<br>Birkett, Lauren; Cumbria Northumberland Tyne and Wear NHS Foundation Trust<br>Brandon, Toby; Northumbria University<br>Dixon, Lyndsey; Cumbria Northumberland Tyne and Wear NHS Foundation Trust<br>Dudley, Robert; University of York; Cumbria Northumberland Tyne and Wear NHS Foundation Trust<br>Einbeck, J; Durham University<br>Gibbs, Christopher; Cumbria Northumberland Tyne and Wear NHS Foundation Trust<br>Kharatikoopaei, Ehsan; Durham University; Manchester Metropolitan University<br>Simpson, Jennifer; Tees Esk and Wear Valleys NHS Foundation Trust<br>Dodgson, Guy; Cumbria Northumberland Tyne and Wear NHS Foundation Trust<br>Fernyhough, Charles; Durham University |
| <b>Primary Subject Heading</b>: | Mental health                                                                                                                                                                                                                                                                                                                                                                                                                                                                                                                                                                                                                                                                                                                                                                                                                                                                                                                                                                                                                                                                |
| Secondary Subject Heading:      | Evidence based practice                                                                                                                                                                                                                                                                                                                                                                                                                                                                                                                                                                                                                                                                                                                                                                                                                                                                                                                                                                                                                                                      |
| Keywords:                       | MENTAL HEALTH, PSYCHIATRY, Randomized Controlled Trial                                                                                                                                                                                                                                                                                                                                                                                                                                                                                                                                                                                                                                                                                                                                                                                                                                                                                                                                                                                                                       |
|                                 |                                                                                                                                                                                                                                                                                                                                                                                                                                                                                                                                                                                                                                                                                                                                                                                                                                                                                                                                                                                                                                                                              |

1  
2  
3  
4  
5  
6  
7  
8  
9  
10  
11  
12  
13  
14  
15  
16  
17  
18  
19  
20  
21  
22  
23  
24  
25  
26  
27  
28  
29  
30  
31  
32  
33  
34  
35  
36  
37  
38  
39  
40  
41  
42  
43  
44  
45  
46  
47  
48  
49  
50  
51  
52  
53  
54  
55  
56  
57  
58  
59  
60

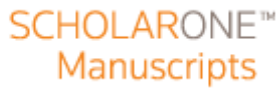

1  
2  
3 **Use of a targeted, computer/web-based guided self-help psychoeducation toolkit for distressing**  
4 **hallucinations (MUSE) in people with an At Risk Mental State for psychosis: protocol for a**  
5 **randomised controlled feasibility trial**  
6  
7  
8  
9

10  
11 **Abstract**  
12

13 **Introduction:** Individuals who access At Risk Mental State (ARMS) services often have unusual  
14 sensory experiences and levels of distress that lead them to seek help. The Managing Unusual  
15 Sensory Experiences (MUSE) treatment is a brief symptom targeted intervention that draws on  
16 psychological explanations to help account for unusual experiences. Practitioners use formulation  
17 and behavioural experiments to support individuals to make sense of their experiences and enhance  
18 coping strategies. The primary objective of this feasibility trial is to resolve key uncertainties before a  
19 definitive trial and inform parameters of a future fully powered trial.  
20  
21  
22  
23  
24

25 **Methods and analysis:** 88 participants aged 14-35 accepted into ARMS services, experiencing  
26 hallucinations / unusual sensory experiences which are considered by the patient to be a key target  
27 problem will be recruited from UK NHS sites and randomised using 1:1 allocation (stratified by site,  
28 gender, and age) to either 6-8 sessions of MUSE or time-matched treatment as usual. Participants  
29 and therapists will be unblinded, research assessors are blinded. Blinded assessment will occur at  
30 baseline, 12weeks, and 20weeks post randomisation. Data will be reported in line with CONSORT.  
31 Primary trial outcomes are feasibility outcomes, primary participant outcomes are functioning and  
32 hallucinations. Additional analysis will investigate potential psychological mechanisms and secondary  
33 mental wellbeing outcomes. Trial progression criteria follows signal of efficacy and uses an analytic  
34 framework with a traffic-light system to determine viability of a future trial. Subsequent analysis of  
35 the NHS England Mental Health Services Data Set 3 years post-randomisation will assess long-term  
36 transition to psychosis.  
37  
38  
39  
40  
41  
42  
43  
44  
45

46 **Ethics and dissemination:** This trial has received Research Ethics Committee approval (Newcastle  
47 North Tyneside 1 REC; 23/NE/0032). Participants provide written informed consent; young people  
48 provide assent with parental consent. Dissemination will be to ARMS Services, participants, public  
49 and patient forums, peer-reviewed publications and conferences.  
50  
51

52 **Trial registration:** ISRCTN58558617.  
53  
54  
55  
56  
57  
58  
59  
60

### Strengths and limitations of this study

- This is a feasibility RCT, results will address key uncertainties to inform a future large-scale trial, including sample size and design decisions.
- The MUSE intervention toolkit, the trial design and participant facing materials have been developed with substantial input from people with lived experience.
- This study is distinctive in exploring potential causal cognitive mechanisms in an At Risk Mental State population who have unusual sensory experiences.
- There is no gold standard treatment to compare the intervention to, so controlled time-matched treatment as usual is selected as the comparator.
- The follow-up period is short (20 weeks post randomisation), therefore longer-term participant impacts will not be fully assessed; however long-term transition to psychosis will be examined via the Mental Health Services Data Set.

### INTRODUCTION

At Risk Mental State (ARMS) describes presentations that indicate a potential prodromal stage of psychosis, or risk of psychosis, with around 25% of ARMS individuals converting to psychosis within 36 months (1). The importance of working with these individuals to target possible unhelpful beliefs in development, reduce distress, support healthy functioning, and potentially to prevent the development of full psychosis is widely advocated (2, 3).

The presence of unusual sensory experiences, such as hearing voices and seeing visions (hallucinations), may not in themselves indicate mental ill health as there may be common underlying psychological mechanisms or a continuum of experience from benign, everyday experiences to more severe hallucinations that require treatment (4). However, increased frequency and intensity of hallucinations, alongside distress and a decline in functioning, are linked to transition to psychosis and are threshold criteria in scales recommended in ARMS services (5, 6). Intervening to reduce the distress of unusual sensory experiences and offer explanations of the possible mechanisms behind these experiences may be key in preventing transition to psychosis (3, 7).

Current UK NICE guidelines recommend that people meeting ARMS criteria should be referred for specialist assessment and offered Cognitive Behavioural Therapy (CBT) to reduce the risk of developing psychosis (8-10). While approaches involving CBT and CBT with supportive therapy show promise in ARMS, the evidence for CBT improving functioning and mental state, or reducing

1  
2  
3 progression to psychosis, is inconclusive (11-13). No specific psychological intervention has been  
4 identified as having superior effectiveness in its treatment; there is no gold standard treatment (11,  
5 14, 15). ARMS services therefore need to further assess interventions that indicate potential benefit.  
6 Robust clinical trials are needed to determine benefits versus risk profiles, accessibility and cost  
7 effectiveness (11, 13, 16).  
8  
9

10  
11  
12 Treatment development would be improved if they addressed key causal mechanisms leading to  
13 distressing experiences, and adapted treatment to the needs of different age groups (17, 18). Taking  
14 a staged or stepped approach to psychological intervention is good practice, usually with CBT and  
15 needs-based interventions prior to pharmacology (8, 18, 19). There is scope for research into briefer  
16 approaches implemented prior to CBT in ARMS services, and emerging evidence from early  
17 intervention in psychosis research that inclusion of briefer targeted evidence-based interventions  
18 prior to CBT may result in a reduction of need for more in-depth CBT, as people better understand  
19 their experiences and have less need for interventions (20).  
20  
21  
22  
23  
24  
25

26 Through extensive multidisciplinary research into voice hearing, clinically embedded research with  
27 patients who are indicating at risk state for psychosis, and studies of first episode psychosis, we have  
28 developed a targeted, computer/web-based guided self-help psychoeducation toolkit for distressing  
29 hallucinations (MUSE) (7, 21). MUSE endeavours to provide scientific and normalising explanations  
30 that may provide acceptable and helpful understandings of an individual's unusual sensory  
31 experiences and help to prevent more delusional explanations from developing. MUSE has been  
32 trialled with an ARMS patient group in a non-randomised study (21) and shown to be acceptable  
33 with good participant satisfaction with the therapy. We intend to assess MUSE through a series of  
34 trials to determine patient benefit and possible impact on progression to psychosis in patients at  
35 high risk. We will also seek to learn more about whether change relates to target mechanisms  
36 underlying hallucination subtypes(22). This could be important for further refinement of treatment.  
37  
38  
39  
40  
41  
42  
43  
44

## 45 **Objectives**

### 46 *Primary objective*

47  
48 To conduct an ISRCTN-registered feasibility randomised controlled trial to resolve key feasibility  
49 uncertainties and inform the parameters of a future trial, to investigate the preliminary effect of  
50 MUSE + treatment as usual (TAU) versus time-matched supportive psychotherapy TAU on general  
51 functioning (assessed using the Social and Occupational Functional Assessment Scale [SOFAS](23),  
52 and mental state related to frequency and distress of unusual sensory experiences and false beliefs  
53 (assessed using the Psychotic Symptom Rating Scales [PSYRATS](24) total score, and sub-scales  
54  
55  
56  
57  
58  
59  
60



Hallucinations and Attribution(25)) in ARMS patients post therapy and at five-month post randomisation follow-up.

### *Secondary objectives*

To explore additional treatment effects on unusual sensory experiences, anxiety, depression, and quality of life, and whether there are indications of other factors (sleep disturbance and trauma) influencing treatment effects.

To test feasibility of collecting measures of psychological mechanisms, including psychological and personal (phenotypical) factors implicated in the clinical course of hallucinations. To analyse which psychological mechanisms are influenced by the treatment and contribute to its clinical effect and inform a future investigation of whether any efficacy of MUSE is through impact on these mechanisms.

To collect routine data for a future records investigation testing feasibility of tracking transition to psychosis through medical databases (hospital records/Mental Health Services Data Set (MHSDS)), to examine which features of MUSE (presenting, treatment response and mechanistic) are most relevant to psychosis prevention.

## **METHODS AND ANALYSIS**

### **Trial design and flowchart**

This is a feasibility trial employing a prospective randomised, open-label, observer blinded, endpoint design assessing a targeted, computer/web based guided self-help psychoeducation toolkit for distressing hallucinations (MUSE)+TAU (6 – 8 sessions) compared to a TAU time-matched control (also referred to as supportive psychotherapy) (6 – 8 sessions) offered by a multi-disciplinary team which includes needs based emotional support, psychoeducation and stress management, aiming to reduce distress from hallucinations and improve functioning, in people with an At Risk Mental State (ARMS) for psychosis in UK secondary care mental health services.

The trial has received NHS Research Ethics positive opinion (23/NE/0032) and Health Research Authority Approvals and is registered with the ISRCTN registry (ISRCTN58558617, registered 09.05.2023). Two substantial amendments followed first approval and were obtained prior to first participant consent: Amendment 1 notably added in an unvalidated Preferences Questionnaire for therapeutic intervention, and changed an anxiety self-report questionnaire over to use the State-Trait Anxiety Inventory – Short Form (STAI-Short Form)(26-28). Amendment 2 replaced a longer

1  
2  
3 dissociative experiences questionnaire for the 8-item Brief Dissociative Experiences Scale [DES-B]—  
4 Modified(29, 30).

7 The trial has an independent trial steering committee (TSC) and Lived Experience Advisory Panel  
8 (LEAP) facilitated by a co-applicant for the study with lived experience of psychosis.

## 11 **Participants**

13 Recruitment will be via NHS secondary care mental health clinical teams providing ARMS services.  
14 Patients who potentially meet the eligibility criteria for the trial, and their parent/guardian where  
15 appropriate if under 18 years, will be informed of the study by a member of their clinical team.  
16 Participants will be checked for eligibility prior to informed consent via discussion with referring  
17 teams and in the participant-researcher discussion prior to giving informed consent. Participant  
18 Information Sheets will be provided at least three days prior to the informed consent meeting.  
19 Written informed consent in adherence to principles of Good Clinical Practice (GCP) will be obtained  
20 prior to participation. For participants aged 14 and 15 years old, Parent/Guardian informed consent  
21 with child assent will be taken; this option of assent with Parent/Guardian consent will also be made  
22 available to participants aged 16 and 17 years old due to their potential vulnerability and the  
23 governing UK law which classes a minor as someone who is under 18 years old. Verbal consent form  
24 will be used for participants with literacy challenges. Interpreters and translated consent forms will  
25 be available for participants who do not speak English. Participants will be given £15 honorarium for  
26 each assessment time-point.

## 37 **Trial eligibility criteria**

### 39 *Inclusion criteria*

- 42 • in contact with an ARMS service or accepted on an ARMS pathway by EIP services
- 44 • aged 14–35
- 46 • hallucinations / unusual sensory experiences scoring at least 3 on the Perceptual  
47 Abnormalities Subscale of the Comprehensive Assessment of At-Risk Mental States (CAARMS)(6)
- 49 • hallucinations considered by the patient to be a key target problem
- 51 • judged to have been clinically stable for the preceding 2 weeks

### 55 *Exclusion criteria*

- 58 • intellectual disability or severe cognitive dysfunction affecting ability to engage with  
59 research materials

- lacking capacity to give informed consent

### Randomisation and blinding

Eligible participants who have completed baseline assessments will be randomised and subsequent assessments will be scheduled from the point of randomisation. An independent web-based randomisation service (sealedenvelope.com) will be used for the trial. Randomisation will be in the ratio 1:1 to the two groups: MUSE+TAU (intervention) or TAU time-matched control (supportive psychotherapy+TAU (control). Randomisation will be stratified by site, gender (M/F/Other) and age (14–17years/18–35 years inclusive). Randomisation allocation will be independent and dynamically generated using a randomised modified minimisation method (31) to assure allocation concealment along with preservation of allocation ratio. Randomisation allocation is made known to the CI and site PIs, the Trial Coordinator(s) and the trial therapists only at the point of randomisation, by email.

Research assessors for the trial will be blind to the allocation throughout the trial. Clinicians, therapists and participants will be unblind. Trial statisticians will be partially blind; In the first instance, for the analyses and reporting of main outcomes of the trial the Statisticians will be fully blind. However, for secondary sensitivity analysis such as impact of number of MUSE sessions on effect size) and the mechanisms investigations, the Statisticians will be required to view which participants received MUSE treatment.

### Assessments

Assessors blinded to trial allocation will complete participant assessments at baseline, 12 weeks post randomisation, and 20 weeks post randomisation (See Table 1). Sociodemographic information will be collected from the participant at baseline only (CSRI questions 1-3.5 as amended for the trial(32)).

**Table 1.** Trial assessments and key participant procedures schedule

| Assessments/<br>procedures              | Participant<br>identification | Enrolment<br>&<br>baseline | Randomisation | Intervention<br>Weeks<br>1-12 | 12<br>weeks<br>post<br>randomisation<br>(+/-<br>10days) | 20<br>weeks<br>post<br>randomisation<br>(+/-<br>10days) |
|-----------------------------------------|-------------------------------|----------------------------|---------------|-------------------------------|---------------------------------------------------------|---------------------------------------------------------|
| Recruitment and eligibility discussions | X                             |                            |               |                               |                                                         |                                                         |
| Informed consent                        |                               | X                          |               |                               |                                                         |                                                         |
| CSRI Sociodemographic Q1-3.5            |                               | X                          |               |                               |                                                         |                                                         |
| Randomisation                           |                               |                            | X             |                               |                                                         |                                                         |
| MUSE & TAU / TAU Intervention           |                               |                            |               | ↔                             |                                                         |                                                         |
| <b>Blinded assessments</b>              |                               |                            |               |                               |                                                         |                                                         |

|                                                                                                |  |   |  |  |    |    |
|------------------------------------------------------------------------------------------------|--|---|--|--|----|----|
| MUSE ARMS Primary Outcome Measures: SOFAS & PSYRATS                                            |  | X |  |  | X  | X  |
| CSRI service use Q4.1-4.4                                                                      |  | X |  |  |    |    |
| CSRI Q4.5 criminal justice services and Q5 medication                                          |  | X |  |  | X  | X  |
| MUSE ARMS Secondary Outcome Measures: CAARMS-PA, PHQ-9, GAD-7, ReQoL-20, ISI, ITQ/ITQ-CA, MMHQ |  | X |  |  | X  | X  |
| Subtype Measures & Cognitive Tasks (1-2 subtypes selected per participant)                     |  | X |  |  | X  | X  |
| Treatment preference                                                                           |  | X |  |  |    |    |
| <b>Unblinded assessments</b>                                                                   |  |   |  |  |    |    |
| CSRI service use at follow-up Q4.1-4.4                                                         |  |   |  |  | X  | X  |
| Transition to Psychosis data                                                                   |  |   |  |  | X  | X  |
| Adverse Event (AE) data                                                                        |  |   |  |  | X  | X  |
| Therapeutic Alliance STTS-R                                                                    |  |   |  |  | X  |    |
| Participants interviews (Withdrawals sub-sample)                                               |  |   |  |  | ←→ |    |
| Participants interviews (MUSE completers sub-sample)                                           |  |   |  |  |    | ←→ |
| Participants interviews (TAU sub-sample)                                                       |  |   |  |  | ←→ |    |
| Therapists interviews (sub-sample)                                                             |  |   |  |  | ←→ |    |

**Primary indicators of outcome**

The primary outcome measures are: (i) Feasibility outcomes, including qualitative interviews; (ii) General functioning assessed using the SOFAS(23), a clinician/clinical researcher rated single-item scale; (iii) Target problem hallucinations assessed using the PSYRATS(24) (hallucination total) clinician/clinical researcher rated interview, and; (iv) Distress and attribution dimensions of target problem assessed using the PSYRATS (25).

**Secondary assessments**

Additional assessments will be the clinician/clinical researcher administered semi-structured interview CAARMS subscale of Perceptual Abnormalities(6) to elicit further detail about the nature of unusual experiences. Self-reported measures will rate depression symptom severity (PHQ-9(33)), anxiety (GAD-7(34)), quality of life (ReQoL-20(35)), sleep difficulties (ISI(36)), and trauma (ITQ/ITQ-CA(37, 38)). An unvalidated measure, the Multi-Modal Hallucinations Scale (MMHS) will be used to assess cross-modal sensory experiences.

**Service use**

Assessment of potential contamination of the MUSE intervention within the TAU condition, of other psychological therapies use within the treatment arms, and the need for additional interventions

1  
2  
3 beyond the treatment phase will be captured using the CSRI(32) (as amended for the trial) at  
4 baseline, 12 week and 20 week follow-up. CSRI service use data at 12 weeks and 20 weeks will be  
5 collected from medical notes by the unblinded researcher to preserve blinding of research assessors.  
6  
7

### 8 9 **Mechanisms assessment**

10  
11 To assess further information on mechanisms, subtype measures & cognitive tasks will be selected  
12 per participant for 1 to 2 hallucination subtypes: (i) Inner speech, using the Varieties Of Inner Speech  
13 Questionnaire (VISQ-R)(39), and computerised cognitive tasks Auditory Signal Detection Task and  
14 Auditory Reality Monitoring Source Memory Task (40, 41); (ii) Memory, using the Brief Dissociative  
15 Experiences Scale —Modified (DES-B)(29, 30) and computerised cognitive task Inhibition of Currently  
16 Irrelevant Memories (ICIM)(42); (iii) Hypervigilance, using the State-Trait Anxiety Inventory – Short  
17 Form (STAI-Short Form)(26-28), and computerised cognitive Jumbled Speech Task (JST)(43, 44), and;  
18 (iv) Visual, using the visual section of the Plymouth Sensory Imagery Questionnaire (Psi-Q)(45) , and  
19 computerised cognitive tasks Visual Signal Detection(46), Visual Reality Monitoring(47) and Face  
20 Pareidolia Task(46). Researchers receive training on subtype selection. Selections are monitored and  
21 evaluated against MUSE therapist subtype selections to assess selection reliability and potential  
22 training needs.  
23  
24  
25  
26  
27  
28  
29  
30

### 31 32 **Acceptability assessment**

33  
34 To assess therapy preference, satisfaction and acceptability of the intervention, participants will be  
35 asked about treatment preferences at baseline using a study specific preferences questionnaire (see  
36 supplementary materials 1), and treatment satisfaction post intervention using the Satisfaction with  
37 Therapy and Therapist Scale-Revised (STTS-R)(48, 49). Qualitative interviews with participants and  
38 trial therapists will further explore experience of MUSE, TAU, and trial procedures.  
39  
40  
41  
42

### 43 44 **Long-term outcomes**

45  
46 Long-term transition to psychosis outcomes will be collected 3 years post baseline via the NHS  
47 England Mental Health Services Data Set (MHSDS).  
48  
49

### 50 51 **Data management**

52  
53 Interview/clinical assessments data will be scored following the visit and entered onto Qualtrics by  
54 the researcher. Source data will be retained in the site file. Self-report data will be entered directly  
55 onto Qualtrics during visits using participant ID and visit as markers. Unblinded data on service use  
56 will be entered onto Qualtrics at the visit time points. Qualtrics outputs and computerised cognitive  
57 task data will be downloaded and date stamped at regular intervals to allow data audit. The full data  
58  
59  
60

1  
2  
3 set will be transferred in its anonymous form to the stats team upon completion of data lock at the  
4 end of the trial. Trial monitoring at sites will occur across the life cycle of the trial and will follow the  
5 Sponsor approved data monitoring plan.  
6  
7

### 8 9 **Intervention: Managing Unusual Sensory Experiences (MUSE) + TAU**

10  
11 The MUSE intervention is a novel targeted, computer/web-based guided self-help psychoeducation  
12 toolkit and psychological treatment manual for managing distressing hallucinations in mental health,  
13 developed and owned jointly by Durham University and CNTW. Patients work with experienced  
14 therapists, under expert supervision, who utilise the MUSE package within therapy sessions to  
15 develop a formulation explaining the development of hallucinations and foster new skills and  
16 strategies for their management. The MUSE treatment is divided into the following modules: What  
17 are Voices?; How the Mind Works; Assessment (of participant subtype); Inner Speech; Memory and  
18 Trauma; Hypervigilance; and Sleep (see Dudley, Dodgson (50) for details).  
19  
20  
21  
22  
23  
24

25 Six to eight 1-hour sessions will be offered weekly by experienced therapists who are clinical  
26 psychologists or psychological therapists. Therapists will be accredited or working towards  
27 accreditation by the British Association of Behavioural and Cognitive Psychotherapists (BABCP),  
28 employed by the ARMS service and have experience of MUSE, receiving clinical supervision and  
29 fortnightly MUSE supervision. MUSE is loaded onto therapists smart tablet/NHS laptop (not reliant  
30 on Wi-Fi) and is available to patients via the CNTW website between sessions. No personal data are  
31 recorded or stored on MUSE toolkit.  
32  
33  
34  
35  
36  
37

38 Session by session measures will be used as part of the MUSE package to enable therapists to  
39 monitor any variations in hallucination frequency and distress that may have a bearing on the  
40 selection of module used or revisited during the treatment session.  
41  
42

43 Therapists will be asked to complete adherence checklists for each session contained within a per-  
44 participant MUSE Therapist Pack (see supplementary materials 2). With consent, each session will be  
45 audio-recorded to enable independent review by the site Principal Investigator or delegated Clinical  
46 Lead of a random 10% sample to ensure fidelity to protocol within and across sites.  
47  
48  
49  
50  
51  
52

### 53 **Control condition: time-matched control + TAU**

54  
55 To control for risk of bias from an undefined comparative treatment, and potential bias from dose  
56 effects, a time-matched TAU is included(11, 51). In order to match the comparative brief  
57 intervention to usual practice within ARMS services, components of care were identified in an  
58  
59  
60

1  
2  
3 engagement meeting with ARMS service leads. These common core components could be described  
4 as supportive psychotherapy or ongoing care (needs based emotional support, psychoeducation,  
5 normalisation and stress management) and were outlined as the interventions used by therapists as  
6 part of their normal clinical toolkit, alongside routine multi-disciplinary care from the team. Patients  
7 work with different therapists who are ARMS clinicians and are not trained in MUSE. These clinicians  
8 will receive supervision on their practice through the routine supervision arrangements of their  
9 service and will record the interventions used within a per-participant TAU Therapist Pack (see  
10 supplementary materials 3). We will investigate how frequently and consistently these supportive  
11 psychotherapy interventions are offered to inform whether these interventions could act as a  
12 comparator intervention in future trials. This arm will be time-matched controlled, however  
13 variation across services precluded using this comparator being defined as a controlled *intervention*.  
14 Number of sessions received in this group will be recorded for analysis.

### 23 **Both groups: TAU**

24  
25 In addition to the trial allocated intervention (MUSE or TAU time-matched control supportive  
26 psychotherapy), both treatment groups will also receive additional usual care as clinically indicated.  
27 No treatments will be withheld on account of being part of the trial. This includes regular  
28 monitoring, signposting to appropriate local services for unmet needs, social support and crisis  
29 management when required from the multi-disciplinary team. CBT is also a core intervention  
30 recommended by NICE Guidance and offered across ARMS services. However, in practice it is not  
31 always offered to all service users. CBT may form part of the care in both conditions as part of usual  
32 care. We will investigate the number of CBT sessions received by participants in both groups and  
33 investigate whether MUSE impacts on the number of sessions required. Additional care will be based  
34 on clinical judgement and will be recorded for both arms of the study. These additional elements of  
35 care, including interventions and contacts that occur beyond the MUSE/time-matched period will be  
36 analysed for variations and similarities in the care received between the two groups.

### 46 **Analysis**

47  
48 Analyses will follow intention to treat principles, with data analysed according to randomisation  
49 irrespective of treatment received. A full statistical analysis plan (SAP) will be developed for the  
50 outcome measures and agreed with TSC before the end of data collection. Data will be reported in  
51 line with the Consolidated Standards of Reporting Trials (CONSORT)(52), see figure 1.

### 56 **Sample size**

1  
2  
3 As this is a feasibility trial there is no formal sample size calculation, interim analyses or stopping  
4 rule. The trial aims to recruit 88 participants with 70 participants completing the study (allowing for  
5 20% attrition) to be able to robustly calculate the sample size for a definitive trial(53).  
6  
7

### 8 9 **Statistical analysis**

10  
11 Feasibility outcomes will be analysed primarily: the ability of the trial to recruit participants, who  
12 reflect the diversity within the region, and meet study inclusion criteria over the 9-month  
13 recruitment period, who complete assessment measures collected at baseline, post intervention and  
14 follow-up, until all participants complete the follow-up assessment or withdraw.  
15  
16

17  
18 Descriptive statistics within each randomised group will be presented for baseline and follow-up  
19 points. All data will be summarised as appropriate using mean  $\pm$  standard deviation and median  $\pm$   
20 interquartile range for continuous outcome data; frequency and percentages for binary or  
21 categorical data; and rate for count data. Analysis will be via the latest version of R.  
22  
23

24  
25 The signal of efficacy will be determined by examining the effect of each arm (MUSE versus  
26 supportive psychotherapy) on outcomes measures, estimated as change from baseline.  
27  
28

29  
30 The effects will be estimated using generalised linear mixed effect models with the appropriate  
31 distribution and link function. Normal distributions with identity link will be used for continuous  
32 outcomes, and negative-binomial distributions with log link for count data outcomes. All binary or  
33 categorical outcomes will be analysed using generalised estimating equations (GEE). The mixed-  
34 effects models and GEE account for the repeated measurements per participant over the follow-up  
35 time points. All models will be adjusted for treatment arms and stratification variables. The mixed  
36 model approach taken will allow identifying the individual effect of the two interventions with  
37 relation to their baseline, as well as the difference in their effects through an interaction parameter  
38 of time and intervention. This can be considered as a model-based difference-in-difference analysis.  
39  
40

41  
42 These models will be used mainly to estimate relevant parameters, since the trial is not powered for  
43 null hypothesis significance-testing. That is, while we are interested in identifying the magnitude of  
44 the signal of efficacy, we will not attempt to prove its significance.  
45  
46

47  
48 In addition, a mediation analysis will examine how the different mechanism components mediate  
49 the estimated impact of the interventions on the primary outcomes, and a complier average causal  
50 effects (CACE) analysis will determine the impact of the number of sessions on the MUSE effect.  
51  
52

53  
54 If data are missing for a particular participant and outcome measure, this participant will be  
55 excluded from the analysis, for this outcome measure only, without further adjustment for  
56  
57  
58  
59  
60



1  
2  
3 missingness. However, the effect of missing data will be investigated additionally by sensitivity  
4 analysis using tabulation of rate of missingness across trial arms and imputation methods.  
5  
6

### 7 **Qualitative analysis**

8  
9 Audio-recordings will be transcribed and analysed (in NVivo software). Interview transcripts will be  
10 analysed using thematic analysis(54) allowing a transparent, replicable and robust process and  
11 demonstration of reflexivity and quality. Transcripts will be coded by two researchers until coding  
12 reliability is established; coding will then be conducted by one researcher, with reliability checks by  
13 the qualitative lead. Data will be extracted into a framework matrix, summarising data by category  
14 from individual transcripts, with quotations selected as illustrative exemplars. Initial findings from  
15 the qualitative analyses will be presented to LEAP for feedback on interpretation.  
16  
17  
18  
19  
20  
21

### 22 **Health economics analysis**

23  
24 As a feasibility study, we are not undertaking a formal economic evaluation at this stage but will  
25 inform a health economic evaluation in a future definitive trial by piloting the ReQoL-Utility Index  
26 with the ReQoL-20 data for health economic analysis calculation.  
27  
28  
29

### 30 **Criteria for proceeding to a future trial**

31  
32 The signal of efficacy is dependent upon the primary outcome data (SOFAS, PSYRATS Total, PSYRATS  
33 distress, PSYRATS attribution) and follows: i) Go: primary outcome data suggest the intervention  
34 may show an effect indicating clinical value warranting further investigation; ii) Refine: primary  
35 outcome data indicate no measure of effect, but one or more secondary outcomes indicates an  
36 effect; iii) Stop: no effect across any outcomes.  
37  
38  
39  
40

41 The trial progression criteria will follow signal of efficacy and cover domains of research delivery,  
42 therapy engagement and fidelity, and safety. The criteria were influenced by LEAP and TSC input and  
43 sign-off. Trial progression criteria uses an analytic framework with a traffic-light system (see  
44 supplementary Table 1). Progression will depend upon: (i) All Green outcomes: no/minor revisions  
45 prior to next development of the trial, or; (ii) One or more Amber (but not Red) outcomes: If  
46 feasible, substantial alterations to the trial protocol, assessments or intervention, supported by the  
47 qualitative work-stream and discussed with TMG and TSC prior to the next development of the trial  
48 or; (iii) If one or more Red outcomes result then the trial is unlikely to progress at that site or very  
49 substantial amendments are needed. The mechanism measures and tasks will also be reviewed for  
50 sensitivity to change and reliability to inform the next development of the trial.  
51  
52  
53  
54  
55  
56  
57  
58  
59  
60

1  
2  
3 Decisions regarding any changes will consider the ADePT decision-making process to address  
4 potential problems with intervention, clinical setting, or trial design that may be relevant in either a  
5 trial setting or real world context. We will use qualitative data to contextualise our progression  
6 criteria, to ensure that the participant feedback informs our understanding of our research delivery  
7 and signal of efficacy.  
8  
9

### 10 11 12 **Adverse events**

13  
14 Serious Adverse Events (SAEs) are defined as: results in death; is life-threatening; requires  
15 hospitalisation or prolongation of existing hospitalisation; results in persistent or significant disability  
16 or incapacity; results in congenital anomaly or birth defect; or is otherwise considered medically  
17 significant by the investigator. Any SAEs shall be assessed immediately for trial relatedness and  
18 expectedness and reported to the Sponsor. Any related and unexpected SAEs and any Urgent Safety  
19 Measures (defined as: early withdrawal of participant(s) due to safety concerns about the  
20 intervention or assessments, or; changes to procedures due to concerns about staff or participant  
21 safety) shall be reported immediately to the Sponsor and Research Ethics Committee in accordance  
22 with Health Research Authority governance regulations (See: [https://www.hra.nhs.uk/approvals-  
23 amendments/managing-your-approval/safety-reporting/](https://www.hra.nhs.uk/approvals-amendments/managing-your-approval/safety-reporting/)) and Sponsor standard operating  
24 procedures.  
25  
26  
27  
28  
29  
30  
31  
32

33  
34 Adverse events will be recorded for all participants where the event relates to mental state, with  
35 focus on clinically significant: a) increases in distress and/or psychosis; b) increased harm to  
36 self/harm to others; c) increased suicidal ideation/attempts; d) increased use of drugs/alcohol; e)  
37 emergency room visits for mental health concerns; f) access to crises services.  
38  
39  
40

### 41 **Patient and public involvement**

42  
43 The MUSE intervention, the trial design and participant facing materials and the grant application  
44 have benefitted from input by individuals with lived experience. To ensure a retained focus on  
45 patients, a Lived Experience Advisory Panel (LEAP) led by a co-applicant with personal lived  
46 experience of psychosis was established and meets monthly in a mixture of online and face-to-face  
47 formats throughout the lifetime of the trial. The study specific Preferences questionnaire was  
48 collaboratively developed with the LEAP. The outcome measures and the topic guides were piloted  
49 with LEAP members and amended following feedback. The LEAP were consulted on the potential  
50 ethical issues of the trial and the trial progression criteria. Members of the LEAP group will also co-  
51 facilitate qualitative interviews, help disseminate study findings, and enable patient experience to  
52 inform design of future research and any revisions of the treatment. Two LEAP members are part of  
53  
54  
55  
56  
57  
58  
59  
60

1  
2  
3 the TSC, with one taking a lead on trial procedures and the other on the inclusion of under-served  
4 groups. Compensation for work done is given in accordance with NIHR PPI guidelines  
5 ([https://www.nihr.ac.uk/documents/ppi-patient-and-public-involvement-resources-for-applicants-](https://www.nihr.ac.uk/documents/ppi-patient-and-public-involvement-resources-for-applicants-to-nihr-research-programmes/23437)  
6 [to-nihr-research-programmes/23437](https://www.nihr.ac.uk/documents/ppi-patient-and-public-involvement-resources-for-applicants-to-nihr-research-programmes/23437)).  
7  
8  
9

## 10 11 12 13 **ETHICS AND DISSEMINATION**

14  
15 This trial has obtained NHS Research Ethics Committee (REC) positive opinion from Newcastle North  
16 Tyneside 1 REC (reference: 23/NE/0032), and UK Health Research Authority approval (IRAS project  
17 ID: 323903). Participants are provided with Participant Information at least three days prior to  
18 providing informed consent. Participants provide written informed consent; young people provide  
19 assent with parental consent (see supplementary materials 4-6). The research Sponsor is Cumbria,  
20 Northumberland, Tyne and Wear NHS Foundation Trust (CNTW).  
21  
22  
23  
24

25  
26 An anonymised version of the main outcome quantitative data and mechanisms data will be  
27 available either in open access as encouraged by peer review publications or from the trial team on  
28 reasonable request with publication of the trial outcomes paper and mechanisms paper.  
29  
30

31  
32 The research outcomes shall be submitted for peer review open access publications. Anonymised  
33 data will be made available in a repository. Trial outcomes, mechanisms evaluations, and long-term  
34 outcomes will be reported on.  
35  
36

37  
38 The trial outcomes: The feasibility trial outcomes will report on feasibility outcomes and the  
39 candidate primary outcome measures (SOFAS and PSYRATS). Secondary reporting will detail the  
40 secondary treatment effects and influence of moderators. Additional reporting will detail treatment  
41 integrity: data on treatment adherence to the model (sessions checklist data); exposure of  
42 participants to the interventions and additional treatments within usual care (CSRI data); the quality  
43 of treatment delivered and responsiveness of participants as reflected on by therapists and  
44 participants (STTS-R data, qualitative data); and the programme differentiation between the novel  
45 intervention arm and the usual care arm (CSRI data).  
46  
47  
48  
49

50  
51 Mechanisms will be reported on the analysis of secondary assessments for the purposes of  
52 informing which aspects of patient presentation the MUSE intervention works with, and informing  
53 the outcome measures in a future efficacy and mechanisms trial.  
54  
55

56  
57 Long-term transition to psychosis paper: Long-term transition to psychosis through the  
58 MHSDS/medical records exploratory feasibility analysis will report which features of MUSE  
59  
60

1  
2  
3 (presentation, treatment response, mechanistic) are indicated as most relevant to psychosis  
4 prevention.  
5

### 6 7 **Trial status**

8  
9 The trial opened to recruitment at the two planned NHS sites on the 14<sup>th</sup> April 2023 (Cumbria,  
10 Northumberland, Tyne and Wear NHS Foundation Trust) and 21<sup>st</sup> April 2023 (Tees, Esk and Wear  
11 alley NHS Foundation Trust). First participant randomisation (enrolment) was on 10<sup>th</sup> May 2023.  
12 Final participant facing procedures are due to be completed by end of June 2024. The study will  
13 finish at NHS research sites after the final assessment with the final participant is completed and the  
14 monitoring close-out visit has occurred at site.  
15  
16  
17  
18  
19  
20  
21  
22

23 \*\*\* \*\*

### 24 25 26 27 **Acknowledgements**

28  
29 We are grateful to our Sponsor, Cumbria, Northumberland, Tyne and Wear NHS Foundation Trust  
30 and the sponsorship team for their backing and support, and to the many individuals in the  
31 collaborating institutions who have enabled this trial to run. We are grateful to the dedicated  
32 involvement and contributions of the MARS Lived Experience Advisory Panel Group members, all  
33 who wish to remain anonymous and those who are happy to be named. Thank you to Gayl McCain,  
34 Katie Rumney, Helen Errington, Patricia Higgins and the whole group. Thanks is noted especially to  
35 all of the people who over the course of this research agree to receive information on the study and  
36 consider whether would like to take part. A number of people gave their time and expertise in  
37 reviewing iterations of the trial development and supporting the trial through the various funding  
38 and approvals systems, who include Stephanie Common, Angus Williams, and others, and our  
39 appreciation is noted. The study has also benefitted from the technical contributions of the  
40 psychologists David Smailes (ORCID ID: 0000-0002-0455-070X) and Peter Moseley (ORCID ID: 0000-  
41 0002-9284-2509) who respectively built the computerised cognitive tasks used in the trial, we are  
42 grateful for this contribution. We would not be able to run the trial without the daily contribution  
43 also from all of the trial researchers on the ground who work within the NHS trusts to support the  
44 day to day running of trial operations, communication with participants, recruitment to the research  
45 and to conduct research assessments; thank you to Michael Kelly, Abbey Underwood, Alexandra  
46 Carne, Vickie Larry, Sarah Bentley, Emily Clare, Melanie Rowe, Victoria Wilson, Sarah Garner and  
47 others. Tremendous thanks is also given to all of the therapists who work into the NHS ARMS  
48  
49  
50  
51  
52  
53  
54  
55  
56  
57  
58  
59  
60

1  
2  
3 services who are delivering the interventions for this study, Carina Ewels, Eloise Todd, Louise Ross,  
4 Andrew Weightman, Claire Mason, Toyah Lebert, Mark Dawson, Louise Leach, Nicola Elliot, Paul  
5 Williams, Luke Rogers, Alison Bernard and others over the life course of the trial and to all of the  
6 individuals who support these services to function.  
7  
8  
9

### 10 **Contributors**

11  
12  
13 Authorship follows ICMJE recommendations. JH is the trial manager and wrote the final protocol and  
14 protocol paper. GD is the chief investigator and has overall responsibility for the trial design and  
15 drafted the initial trial protocol. GD and CF are the joint study leads and lead on supervision and trial  
16 decisions. RD, BA, CA, NB, TB, LD, CG, and JS contributed to the study design. GD and CF led the  
17 development of the treatment with substantial input from a range of clinicians and service users. CG  
18 was responsible for patient and public involvement. JE and EK are responsible for the statistical  
19 analysis design. NB, JS, and LB coordinated the trial at sites and were responsible for recruitment. All  
20 authors read and approved the final trial protocol.  
21  
22  
23  
24  
25

### 26 **Funding**

27  
28  
29 This project is funded by the National Institute for Health and Care Research (NIHR) under its  
30 Research for Patient Benefit (RfPB) Programme (Grant Reference Number NIHR204125). The views  
31 expressed are those of the author(s) and not necessarily those of the NIHR or the Department of  
32 Health and Social Care.  
33  
34  
35

### 36 **Competing interests**

37  
38  
39 GD, RD, JS, NB and CA provide psychological therapies for individuals with psychosis in NHS settings.  
40 RD receives payment for workshops in treating hallucinations. GD, RD, CF, NB, and CA hold or have  
41 held grants to develop and carry out trials of psychological therapy for individuals with psychosis. LD  
42 provides sponsorship oversight of trials in CNTW NHS FT. All other authors declare no competing  
43 interest. The MUSE toolkit is the joint intellectual property of Durham University and Cumbria,  
44 Northumberland, Tyne and Wear NHS Foundation Trust and will be made freely available if proven  
45 to be beneficial.  
46  
47  
48  
49  
50

### 51 **Patient consent for publication**

52  
53  
54 Not applicable.  
55

### 56 **Provenance and peer review**

57  
58  
59 Not commissioned; peer reviewed for ethical and funding approval prior to submission.  
60

## Open access

This is an open access article distributed in accordance with the Creative Commons Attribution 4.0 Unported (CC BY 4.0) license, which permits others to copy, redistribute, remix, transform and build upon this work for any purpose, provided the original work is properly cited, a link to the licence is given, and indication of whether changes were made. See: <https://creativecommons.org/licenses/by/4.0/>.

## References

1. Salazar de Pablo G, Radua J, Pereira J, Bonoldi I, Arienti V, Besana F, et al. Probability of Transition to Psychosis in Individuals at Clinical High Risk An Updated Meta-analysis. *JAMA Psychiatry*. 2021;78:970-8.
2. Salazar De Pablo G, Estradé A, Cutroni M, Andlauer O, Fusar-Poli P. Establishing a clinical service to prevent psychosis: What, how and when? Systematic review. *Translational Psychiatry*. 2021;11(1).
3. Yung AR, Wood SJ, Malla A, Nelson B, McGorry P, Shah J. The reality of at risk mental state services: a response to recent criticisms. *Psychological Medicine*. 2021;51(2):212-8.
4. Toh WL, Moseley P, Fernyhough C. Hearing voices as a feature of typical and psychopathological experience. *Nature Reviews Psychology*. 2022;1(2):72-86.
5. Nelson B, Yung A, Markulev C, Nicoll M. The CAARMS: assessing young people at ultra high risk of psychosis: Orygen Youth Health Research Centre; 2014.
6. Yung AR, Yuen HP, McGorry PD, Phillips LJ, Kelly D, Dell'Olio M, et al. Mapping the onset of psychosis: the Comprehensive Assessment of At-Risk Mental States. *Aust N Z J Psychiatry* 2005;39:964–71.
7. Dodgson G, Alderson-Day B, Smailes D, Ryles F, Mayer C, Glen-Davison J, et al. Tailoring cognitive behavioural therapy to subtypes of voice-hearing using a novel tabletised manual: a feasibility study. *Behavioural and Cognitive Psychotherapy*. 2021;49(3):287-301.
8. NICE. Psychosis and schizophrenia in adults: prevention and management. 2014:1-40.
9. NICE. Psychosis and schizophrenia. 2021.
10. NICE. Psychosis and schizophrenia in children and young people: recognition and management. 2013:1-48.
11. Bosnjak Kuharic D, Kekin I, Hew J, Rojnic Kuzman M, Puljak L. Interventions for prodromal stage of psychosis. *Cochrane Database Syst Rev*. 2019;2019(11).
12. Mei C, van der Gaag M, Nelson B, Smit F, Yuen HP, Berger M, et al. Preventive interventions for individuals at ultra high risk for psychosis: An updated and extended meta-analysis. *Clinical psychology review*. 2021;86:102005.
13. Stafford MR, Jackson H, Mayo-Wilson E, Morrison AP, Kendall T. Early interventions to prevent psychosis: systematic review and meta-analysis. *BMJ*. 2013;346(jan18 1):f185-f.
14. Fusar-Poli P, Davies C, Solmi M, Brondino N, De Micheli A, Kotlicka-Antczak M, et al. Preventive Treatments for Psychosis: Umbrella Review (Just the Evidence). *Front Psychiatry*. 2019;10:764.
15. van der Gaag M, van den Berg D, Ising H. CBT in the prevention of psychosis and other severe mental disorders in patients with an at risk mental state: A review and proposed next steps. *Schizophrenia research*. 2019;203:88-93.
16. Aceituno D, Vera N, Prina AM, McCrone P. Cost-effectiveness of early intervention in psychosis: systematic review. *The British Journal of Psychiatry*. 2019;215(01):388-94.

17. Wykes T, Bell A, Carr S, Coldham T, Gilbody S, Hotopf M, et al. Shared goals for mental health research: what, why and when for the 2020s. *Journal of Mental Health*. 2021;1-9.
18. Schmidt SJ, Schultze-Lutter F, Schimmelmann BG, Maric NP, Salokangas RK, Riecher-Rössler A, et al. EPA guidance on the early intervention in clinical high risk states of psychoses. *Eur Psychiatry*. 2015;30(3):388-404.
19. Addington J, Addington D, Abidi S, Raedler T, Remington G. Canadian Treatment Guidelines for Individuals at Clinical High Risk of Psychosis. *Can J Psychiatry*. 2017;62(9):656-61.
20. Drake RJ, Day CJ, Picucci R, Warburton J, Larkin W, Husain N, et al. A naturalistic, randomized, controlled trial combining cognitive remediation with cognitive-behavioural therapy after first-episode non-affective psychosis. *Psychol Med*. 2014;44(9):1889-99.
21. Dodgson G, Aynsworth C, Mitrenga KJ, Gibbs C, Patton V, Fernyhough C, et al. Managing unusual sensory experiences: A feasibility trial in an At Risk Mental States for psychosis group. *Psychology and Psychotherapy: Theory, Research and Practice*. 2021;94(3):481-503.
22. McCarthy-Jones S, Thomas N, Strauss C, Dodgson G, Jones N, Woods A, et al. Better than mermaids and stray dogs? Subtyping auditory verbal hallucinations and its implications for research and practice. *Schizophrenia bulletin*. 2014;40 Suppl 4(Suppl 4):S275-84.
23. Goldman HH, Skodol AE, Lave TR. Revising axis V for DSM-IV: a review of measures of social functioning. *Am J Psychiatry*. 1992;149(9):1148-56.
24. Haddock G, McCarron J, Tarrier N, Faragher EB. Scales to measure dimensions of hallucinations and delusions: the psychotic symptom rating scales (PSYRATS). *Psychol Med*. 1999;29(4):879-89.
25. Woodward TS, Jung K, Hwang H, Yin J, Taylor L, Menon M, et al. Symptom dimensions of the psychotic symptom rating scales in psychosis: a multisite study. *Schizophrenia bulletin*. 2014;40 Suppl 4(Suppl 4):S265-74.
26. Zsido AN, Teleki SA, Csokasi K, Rozsa S, Bandi SA. Development of the short version of the spielberger state-trait anxiety inventory. *Psychiatry Res*. 2020;291:113223.
27. Spielberger CD. State-Trait Anxiety Inventory. *The Corsini Encyclopedia of Psychology*1983.
28. Spielberger CD, Gorsuch RL, Lushene RE. *Manual for the State-Trait Anxiety Inventory*1970.
29. Dalenberg C, Carlson E. Severity of Dissociative Symptoms—Adult (Brief Dissociative Experiences Scale [DES-B]—Modified) [Measurement instrument]. American Psychiatric Association; 2010.
30. Dalenberg C, Carlson E. Severity of Dissociative Symptoms—Child Age 11–17 (Brief Dissociative Experiences Scale [DES-B]—Modified) [Measurement instrument]. . American Psychiatric Association; 2010.
31. Kuznetsova OM, Tymofyeyev Y. Preserving the allocation ratio at every allocation with biased coin randomization and minimization in studies with unequal allocation. *Statistics in Medicine*. 2012;31(8):701-23.
32. Beecham J, Knapp M. Costing psychiatric interventions. In: Thornicroft G, editor. *Measuring Mental Health Needs*. 2nd ed: Gaskell; 2001. p. 200-24.
33. Kroenke K, Spitzer RL, Williams JB. The PHQ-9: validity of a brief depression severity measure. *J Gen Intern Med*. 2001;16(9):606-13.
34. Spitzer RL, Kroenke K, Williams JB, Löwe B. A brief measure for assessing generalized anxiety disorder: the GAD-7. *Arch Intern Med*. 2006;166(10):1092-7.
35. Keetharuth AD, Brazier J, Connell J, Bjorner JB, Carlton J, Taylor Buck E, et al. Recovering Quality of Life (ReQoL): a new generic self-reported outcome measure for use with people experiencing mental health difficulties. *Br J Psychiatry*. 2018;212(1):42-9.
36. Bastien CH, Vallières A, Morin CM. Validation of the Insomnia Severity Index as an outcome measure for insomnia research. *Sleep Med*. 2001;2(4):297-307.
37. Cloitre M, Shevlin M, Brewin CR, Bisson JI, Roberts NP, Maercker A, et al. The International Trauma Questionnaire: development of a self-report measure of ICD-11 PTSD and complex PTSD. *Acta Psychiatr Scand*. 2018;138(6):536-46.

- 1
- 2
- 3
- 4 38. Haselgruber A, Sölva K, Lueger-Schuster B. Symptom structure of ICD-11 Complex
- 5 Posttraumatic Stress Disorder (CPTSD) in trauma-exposed foster children: examining the
- 6 International Trauma Questionnaire - Child and Adolescent Version (ITQ-CA). *Eur J Psychotraumatol*.
- 7 2020;11(1):1818974.
- 8 39. Alderson-Day B, Mitrenga K, Wilkinson S, McCarthy-Jones S, Fernyhough C. The varieties of
- 9 inner speech questionnaire – Revised (VISQ-R): Replicating and refining links between inner speech
- 10 and psychopathology. *Consciousness and Cognition*. 2018;65:48-58.
- 11 40. Bentall RP, Slade PD. Reality testing and auditory hallucinations: a signal detection analysis.
- 12 *Br J Clin Psychol*. 1985;24 ( Pt 3):159-69.
- 13 41. Moseley P, Aleman A, Allen P, Bell V, Bless J, Bortolon C, et al. Correlates of Hallucinatory
- 14 Experiences in the General Population: An International Multisite Replication Study. *Psychological*
- 15 *Science*. 2021;32(7):1024-37.
- 16 42. Paulik G, Badcock JC, Maybery MT. Poor intentional inhibition in individuals predisposed to
- 17 hallucinations. *Cognitive Neuropsychiatry*. 2007;12:457-70.
- 18 43. Campbell ML, Morrison AP. The relationship between bullying, psychotic-like experiences
- 19 and appraisals in 14-16-year olds. *Behav Res Ther*. 2007;45(7):1579-91.
- 20 44. Fernyhough C, Bland K, Meins E, Coltheart M. Imaginary companions and young children's
- 21 responses to ambiguous auditory stimuli: implications for typical and atypical development. *J Child*
- 22 *Psychol Psychiatry*. 2007;48(11):1094-101.
- 23 45. Andrade J, May J, Deeprase C, Baugh SJ, Ganis G. Assessing vividness of mental imagery: The
- 24 Plymouth Sensory Imagery Questionnaire. *Br J Psychol*. 2014;105(4):547-63.
- 25 46. Smailes D, Burdis E, Gregoriou C, Fenton B, Dudley R. Pareidolia-proneness, reality
- 26 discrimination errors, and visual hallucination-like experiences in a non-clinical sample. *Cognitive*
- 27 *Neuropsychiatry*. 2020;25:113-25.
- 28 47. Aynsworth C, Nemat N, Collerton D, Smailes D, Dudley R. Reality monitoring performance
- 29 and the role of visual imagery in visual hallucinations. *Behaviour Research and Therapy*.
- 30 2017;97:115-22.
- 31 48. Oei TP, Shuttlewood GJ. Development of a Satisfaction with Therapy and Therapist Scale.
- 32 *Aust N Z J Psychiatry*. 1999;33(5):748-53.
- 33 49. Oei TPS, Green AL. The Satisfaction With Therapy and Therapist Scale--Revised (STTS-R) for
- 34 group psychotherapy: Psychometric properties and confirmatory factor analysis. *Professional*
- 35 *Psychology: Research and Practice*. 2008;39(4):435-42.
- 36 50. Dudley R, Dodgson G, Common S, O'Grady L, Watson F, Gibbs C, et al. Managing Unusual
- 37 Sensory Experiences in People with First-Episode Psychosis (MUSE FEP): a study protocol for a single-
- 38 blind parallel-group randomised controlled feasibility trial. *BMJ Open*. 2022;12(5):e061827.
- 39 51. Higgins JPT, Green S. *Cochrane handbook for systematic reviews of interventions*: John Wiley
- 40 & Sons; 2011.
- 41 52. Schulz KF, Altman DG, Moher D, the CG. CONSORT 2010 Statement: updated guidelines for
- 42 reporting parallel group randomised trials. *BMC Medicine*. 2010;8(1):18.
- 43 53. Teare MD, Dimairo M, Shephard N, Hayman A, Whitehead A, Walters SJ. Sample size
- 44 requirements to estimate key design parameters from external pilot randomised controlled trials: a
- 45 simulation study. *Trials*. 2014;15(1):264.
- 46 54. Braun V, Clarke V. Using thematic analysis in psychology. *Qualitative research in psychology*.
- 47 2006;3:77-101.
- 48
- 49
- 50
- 51
- 52
- 53
- 54
- 55
- 56
- 57
- 58
- 59
- 60

## FIGURE TITLE

**Figure 1.** Data to report in line with the Consolidated Standards of Reporting Trials (CONSORT)



1  
2  
3  
4  
5  
6  
7  
8  
9  
10  
11  
12  
13  
14  
15  
16  
17  
18  
19  
20  
21  
22  
23  
24  
25  
26  
27  
28  
29  
30  
31  
32  
33  
34  
35  
36  
37  
38  
39  
40  
41  
42  
43  
44  
45  
46  
47  
48  
49  
50  
51  
52  
53  
54  
55  
56  
57  
58  
59  
60

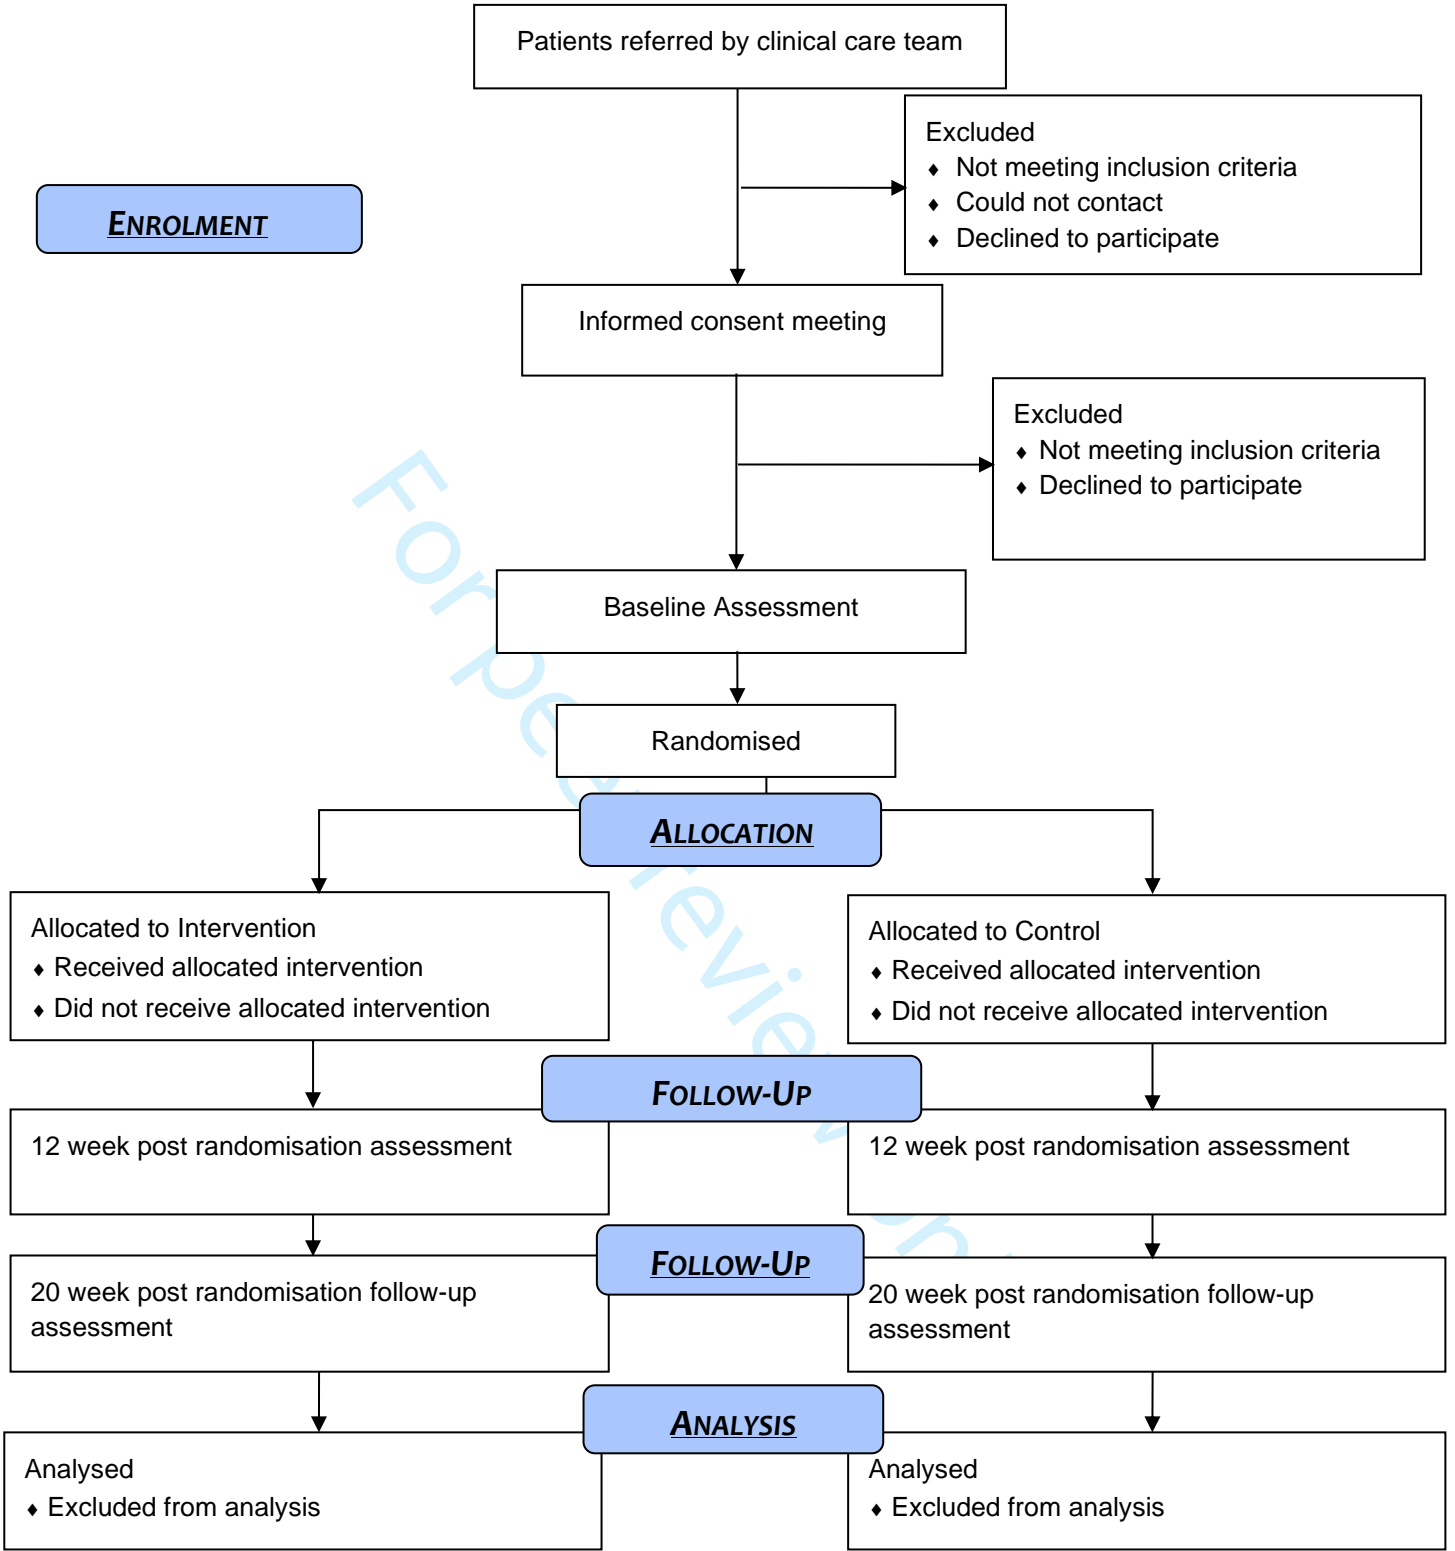

**Supplementary Table 1. Approved trial monitoring and progression criteria to a future definitive trial**

| Criterion                      | Critical feasibility outcome                                                                                                                              | Other feasibility and acceptability data relevant to the criterion                                                                                                                                                                                               |                                                                                                                                                                                                                                                                         | Proposed thresholds on critical outcome                                                                                                                                                                                                                                                                                                                                                                                                                                                                                                                                                                                                              |
|--------------------------------|-----------------------------------------------------------------------------------------------------------------------------------------------------------|------------------------------------------------------------------------------------------------------------------------------------------------------------------------------------------------------------------------------------------------------------------|-------------------------------------------------------------------------------------------------------------------------------------------------------------------------------------------------------------------------------------------------------------------------|------------------------------------------------------------------------------------------------------------------------------------------------------------------------------------------------------------------------------------------------------------------------------------------------------------------------------------------------------------------------------------------------------------------------------------------------------------------------------------------------------------------------------------------------------------------------------------------------------------------------------------------------------|
| 1) <b>Recruitment</b>          | <ul style="list-style-type: none"> <li>Number of participants consented into the trial and randomised</li> </ul>                                          | <ul style="list-style-type: none"> <li>Number of referrals per month</li> <li>Source of recruitment</li> <li>Number of participants eligible,</li> <li>Number of participants referred</li> <li>Reasons for non-eligibility or withdrawal of interest</li> </ul> | <br><br>       | <p>Feasibility will be demonstrated where an average of least 7.84 participants are recruited and randomised per month (80% of recruitment target met).</p> <p>If at least 5.88 participants are recruited per month, then a future trial will be feasible but additional strategies must be identified to support recruitment (e.g. informed by other feasibility data relevant to this criterion) (60-80% of recruitment target met).</p> <p>If an average of under 5.88 participant is recruited per month over the recruitment period, feasibility within the current design will not be demonstrated (under 60% of recruitment target met).</p> |
| 2) <b>Therapy engagement</b>   | <ul style="list-style-type: none"> <li>% who drop-out of therapy</li> </ul>                                                                               | <ul style="list-style-type: none"> <li>Session record forms for each therapy session</li> <li>Number of therapy sessions attended</li> <li>Qualitative interviews with SU participants</li> <li>Therapy satisfaction scores</li> </ul>                           | <br><br>       | <p>Feasibility will be demonstrated if at least 80% of the participants in the intervention arm completed at least 4 out of the 6-8 sessions of MUSE.</p> <p>If 60-80% of participants in the intervention arm complete at least 4 out of the 6-8 sessions of MUSE.</p> <p>If less than 60% of participants in the intervention arm complete at least 4 out of the 6-8 sessions of MUSE.</p>                                                                                                                                                                                                                                                         |
| 3) <b>Assessment retention</b> | <ul style="list-style-type: none"> <li>% of participants who are lost to follow-up at primary assessment endpoint (12weeks post randomisation)</li> </ul> | <ul style="list-style-type: none"> <li>Reasons for withdrawal from the study</li> <li>Qualitative interviews with SU participants</li> <li>Data completion</li> </ul>                                                                                            | <br><br>       | <p>If at least 70% of participants complete primary outcome measure at primary assessment endpoint, feasibility will be demonstrated.</p> <p>If 50-70% of participants complete primary outcome measure at primary assessment endpoint, a future trial will be feasible if strategies to overcome barriers are identified (e.g. via other data relevant to this).</p> <p>If less than 50% of participants complete primary outcome measure at primary assessment endpoint, feasibility within the current design will not be demonstrated.</p>                                                                                                       |
| 4) <b>Therapy fidelity</b>     | <ul style="list-style-type: none"> <li>Adherence ratings from therapy tapes</li> </ul>                                                                    | <ul style="list-style-type: none"> <li>Session record form for each therapy session (including reasons for deviation from protocol)</li> </ul>                                                                                                                   | <br><br>     | <p>Feasibility will be demonstrated if over 80% of rated therapy tapes are rated as acceptable.</p> <p>If 50-80% of rated therapy tapes are rated as acceptable, a future trial will be feasible if strategies to overcome barriers are identified</p> <p>If less than 50% of rated therapy tapes will be rates as acceptable, feasibility within the current design will not be demonstrated.</p>                                                                                                                                                                                                                                                   |
| 5) <b>Safety</b>               | <ul style="list-style-type: none"> <li>Number of related SAEs</li> </ul>                                                                                  | <ul style="list-style-type: none"> <li>Increased number of AEs in Intervention condition</li> </ul>                                                                                                                                                              | <br><br> | <p>0-1 Related SAEs in the Intervention arm.</p> <p>2 Related SAEs in the Intervention arm.</p> <p>3+ Related SAEs in the Intervention arm.</p>                                                                                                                                                                                                                                                                                                                                                                                                                                                                                                      |

1  
2  
3  
4  
5  
6  
7  
8  
9  
10  
11  
12  
13  
14  
15  
16  
17  
18  
19  
20  
21  
22  
23  
24  
25  
26  
27  
28  
29  
30  
31  
32  
33  
34  
35  
36  
37  
38  
39  
40  
41  
42  
43  
44  
45  
46

For peer review only

MUSE ARMS Feasibility Trial: Preferences Questionnaire; v1.0, 12.03.2023  
IRAS Project ID: 323903

### Preferences for psychological therapy or support

This set of questions is seeking to develop an understanding of your preferences for therapy treatment.

1. Do you have a preference for the number of therapy sessions you might get?

- 1-3
- 4-8
- 9-16
- 17-30
- Don't know

2. How important is it that your treatment:

Includes being give medication?

- Not important
- Somewhat important
- Very important

Includes a talking therapy?

- Not important
- Somewhat important
- Very important

Addresses any feelings of anxiety?

- Not important
- Somewhat important
- Very important

MUSE ARMS Feasibility Trial: Preferences Questionnaire; v1.0, 12.03.2023  
IRAS Project ID: 323903

Addresses any feeling of low mood?

- Not important
- Somewhat important
- Very important

Helps you understand the causes of any unusual sensory experiences, such as hearing a voice?

- Not important
- Somewhat important
- Very important

Helps you learn to manage any unusual sensory experiences?

- Not important
- Somewhat important
- Very important

Helps you feel less distressed about any unusual sensory experiences?

- Not important
- Somewhat important
- Very important

3. What are your preferences for the way the therapist/clinical care team works with you?

Please rate how important you think the following statements are:

I am given space to talk and feel heard

- Not important
- Somewhat important
- Very important

MUSE ARMS Feasibility Trial: Preferences Questionnaire; v1.0, 12.03.2023  
IRAS Project ID: 323903

I work with my therapist to help me make sense of my experiences

- Not important
- Somewhat important
- Very important

I am involved in setting my own goals

- Not important
- Somewhat important
- Very important

I am given new ideas of how to cope with my experiences

- Not important
- Somewhat important
- Very important

4. How much do you hope to get the MUSE therapy?

- I would prefer to be allocated to MUSE based therapy
- I don't mind one way or the other whether I receive MUSE based therapy
- I would prefer to be allocated to the treatment as usual.

1  
2  
3  
4  
5  
6  
7  
8  
9  
10  
11  
12  
13  
14  
15  
16  
17  
18  
19  
20  
21  
22  
23  
24  
25  
26  
27  
28  
29  
30  
31  
32  
33  
34  
35  
36  
37  
38  
39  
40  
41  
42  
43  
44  
45  
46  
47  
48  
49  
50  
51  
52  
53  
54  
55  
56  
57  
58  
59  
60

# MUSE THERAPY THERAPIST PACK

\*Return to research site file for archiving after completion

**Adherence Checklist: MUSE Therapy Sessions  
(Please tick topic used in any session)**

|                                        |           |           |           |           |           |           |           |           |                 |
|----------------------------------------|-----------|-----------|-----------|-----------|-----------|-----------|-----------|-----------|-----------------|
| Insert Date:                           |           |           |           |           |           |           |           |           |                 |
| Insert length of session (minutes):    |           |           |           |           |           |           |           |           |                 |
| <b>Module/Topic</b>                    | <b>S1</b> | <b>S2</b> | <b>S3</b> | <b>S4</b> | <b>S5</b> | <b>S6</b> | <b>S7</b> | <b>S8</b> | <b>Comments</b> |
| <b>What are voices?</b>                |           |           |           |           |           |           |           |           |                 |
| What are voices?                       |           |           |           |           |           |           |           |           |                 |
| How many people hear voices?           |           |           |           |           |           |           |           |           |                 |
| Why does it become a problem?          |           |           |           |           |           |           |           |           |                 |
| Can things get better?                 |           |           |           |           |           |           |           |           |                 |
| Personal experiences                   |           |           |           |           |           |           |           |           |                 |
| <b>1. How the mind works?</b>          |           |           |           |           |           |           |           |           |                 |
| Thoughts and senses                    |           |           |           |           |           |           |           |           |                 |
| How thoughts work                      |           |           |           |           |           |           |           |           |                 |
| Embarrassing thoughts                  |           |           |           |           |           |           |           |           |                 |
| The power of attention                 |           |           |           |           |           |           |           |           |                 |
| How we use expectation                 |           |           |           |           |           |           |           |           |                 |
| <b>2. Assessment</b>                   |           |           |           |           |           |           |           |           |                 |
| Types of unusual sensory experiences.  |           |           |           |           |           |           |           |           |                 |
| What kind of voices do we hear?        |           |           |           |           |           |           |           |           |                 |
| <b>3. Inner Speech</b>                 |           |           |           |           |           |           |           |           |                 |
| What is inner speech?                  |           |           |           |           |           |           |           |           |                 |
| Our inner speech can do amazing things |           |           |           |           |           |           |           |           |                 |
| Why do people not recognise voices?    |           |           |           |           |           |           |           |           |                 |
| Thoughts are hard to control           |           |           |           |           |           |           |           |           |                 |
| Blocking the loop                      |           |           |           |           |           |           |           |           |                 |
| Inner speech – what is the evidence?   |           |           |           |           |           |           |           |           |                 |
| Tracking the self – Was that me?       |           |           |           |           |           |           |           |           |                 |
| Writers and voice hearing              |           |           |           |           |           |           |           |           |                 |
| Imaginary friends                      |           |           |           |           |           |           |           |           |                 |
| Formulation                            |           |           |           |           |           |           |           |           |                 |
| Voices and Relationships               |           |           |           |           |           |           |           |           |                 |
| Transforming the voice                 |           |           |           |           |           |           |           |           |                 |
| Testing out your explanations          |           |           |           |           |           |           |           |           |                 |

**Completed by**

|                                  |             |       |            |                           |
|----------------------------------|-------------|-------|------------|---------------------------|
| Participant ID (MUSE ID Number): | Print Name: | Role: | Signature: | Completed on (DD/MM/YYYY) |
|----------------------------------|-------------|-------|------------|---------------------------|



|    |                                              |  |  |  |  |  |  |  |  |  |  |  |
|----|----------------------------------------------|--|--|--|--|--|--|--|--|--|--|--|
| 1  |                                              |  |  |  |  |  |  |  |  |  |  |  |
| 2  |                                              |  |  |  |  |  |  |  |  |  |  |  |
| 3  |                                              |  |  |  |  |  |  |  |  |  |  |  |
| 4  | Living well with voices                      |  |  |  |  |  |  |  |  |  |  |  |
| 5  |                                              |  |  |  |  |  |  |  |  |  |  |  |
| 6  | 4. <b>Memory Based Voices</b>                |  |  |  |  |  |  |  |  |  |  |  |
| 7  | Memory, dissociation, trauma                 |  |  |  |  |  |  |  |  |  |  |  |
| 8  |                                              |  |  |  |  |  |  |  |  |  |  |  |
| 9  | The importance of trauma                     |  |  |  |  |  |  |  |  |  |  |  |
| 10 |                                              |  |  |  |  |  |  |  |  |  |  |  |
| 11 | Threat system and Soothing system            |  |  |  |  |  |  |  |  |  |  |  |
| 12 |                                              |  |  |  |  |  |  |  |  |  |  |  |
| 13 | Formulation                                  |  |  |  |  |  |  |  |  |  |  |  |
| 14 |                                              |  |  |  |  |  |  |  |  |  |  |  |
| 15 | Treating trauma                              |  |  |  |  |  |  |  |  |  |  |  |
| 16 | 5. <b>Hypervigilance</b>                     |  |  |  |  |  |  |  |  |  |  |  |
| 17 | Nature versus Nurture                        |  |  |  |  |  |  |  |  |  |  |  |
| 18 |                                              |  |  |  |  |  |  |  |  |  |  |  |
| 19 | Filling in the gaps                          |  |  |  |  |  |  |  |  |  |  |  |
| 20 |                                              |  |  |  |  |  |  |  |  |  |  |  |
| 21 | What our perception system is designed to do |  |  |  |  |  |  |  |  |  |  |  |
| 22 |                                              |  |  |  |  |  |  |  |  |  |  |  |
| 23 | Response to danger                           |  |  |  |  |  |  |  |  |  |  |  |
| 24 |                                              |  |  |  |  |  |  |  |  |  |  |  |
| 25 | Formulation                                  |  |  |  |  |  |  |  |  |  |  |  |
| 26 |                                              |  |  |  |  |  |  |  |  |  |  |  |
| 27 | Threat system and soothing system            |  |  |  |  |  |  |  |  |  |  |  |
| 28 |                                              |  |  |  |  |  |  |  |  |  |  |  |
| 29 | Mistrust                                     |  |  |  |  |  |  |  |  |  |  |  |
| 30 | 6. <b>Seeing Visions</b>                     |  |  |  |  |  |  |  |  |  |  |  |
| 31 | Is seeing believing?                         |  |  |  |  |  |  |  |  |  |  |  |
| 32 |                                              |  |  |  |  |  |  |  |  |  |  |  |
| 33 | What do your visions mean to you?            |  |  |  |  |  |  |  |  |  |  |  |
| 34 |                                              |  |  |  |  |  |  |  |  |  |  |  |
| 35 | Perception system design                     |  |  |  |  |  |  |  |  |  |  |  |
| 36 |                                              |  |  |  |  |  |  |  |  |  |  |  |
| 37 | Filling in the gaps                          |  |  |  |  |  |  |  |  |  |  |  |
| 38 |                                              |  |  |  |  |  |  |  |  |  |  |  |
| 39 | Tracking the self – was that me?             |  |  |  |  |  |  |  |  |  |  |  |
| 40 |                                              |  |  |  |  |  |  |  |  |  |  |  |
| 41 | Imaginary friends                            |  |  |  |  |  |  |  |  |  |  |  |
| 42 |                                              |  |  |  |  |  |  |  |  |  |  |  |
| 43 | Testing distressing appraisals               |  |  |  |  |  |  |  |  |  |  |  |
| 44 |                                              |  |  |  |  |  |  |  |  |  |  |  |
| 45 | Changing images                              |  |  |  |  |  |  |  |  |  |  |  |
| 46 |                                              |  |  |  |  |  |  |  |  |  |  |  |
| 47 | Living well with visual experiences          |  |  |  |  |  |  |  |  |  |  |  |
| 48 |                                              |  |  |  |  |  |  |  |  |  |  |  |
| 49 | Voices, visions and relationships            |  |  |  |  |  |  |  |  |  |  |  |
| 50 |                                              |  |  |  |  |  |  |  |  |  |  |  |
| 51 | Challenging unacceptability                  |  |  |  |  |  |  |  |  |  |  |  |
| 52 |                                              |  |  |  |  |  |  |  |  |  |  |  |
| 53 | Testing out your explanations                |  |  |  |  |  |  |  |  |  |  |  |
| 54 |                                              |  |  |  |  |  |  |  |  |  |  |  |
| 55 | Living well with voices and visions          |  |  |  |  |  |  |  |  |  |  |  |
| 56 |                                              |  |  |  |  |  |  |  |  |  |  |  |
| 57 | 7. <b>Sleep</b>                              |  |  |  |  |  |  |  |  |  |  |  |
| 58 | Why do we sleep?                             |  |  |  |  |  |  |  |  |  |  |  |
| 59 |                                              |  |  |  |  |  |  |  |  |  |  |  |
| 60 | How to sleep well                            |  |  |  |  |  |  |  |  |  |  |  |

## Completed by

|                                  |             |       |            |                           |
|----------------------------------|-------------|-------|------------|---------------------------|
| Participant ID (MUSE ID Number): | Print Name: | Role: | Signature: | Completed on (DD/MM/YYYY) |
|----------------------------------|-------------|-------|------------|---------------------------|

**Adverse Events Checklist**

|                                                                        |           |           |           |           |           |           |           |           |                 |
|------------------------------------------------------------------------|-----------|-----------|-----------|-----------|-----------|-----------|-----------|-----------|-----------------|
| Insert date:                                                           |           |           |           |           |           |           |           |           |                 |
|                                                                        | <b>S1</b> | <b>S2</b> | <b>S3</b> | <b>S4</b> | <b>S5</b> | <b>S6</b> | <b>S7</b> | <b>S8</b> | <b>Comments</b> |
| <b>Adverse events of interest reported?</b><br><b>Add to Rio/Paris</b> |           |           |           |           |           |           |           |           |                 |
| <b>Serious Adverse Event? NB 24hour reporting deadline</b>             |           |           |           |           |           |           |           |           |                 |
| <b>Urgent Safety Measures? NB Phone PI immediately</b>                 |           |           |           |           |           |           |           |           |                 |

**Adverse Events Guidance:**

Adverse Events. Record on Rio/Paris for collection by the Unblinded Researcher at the 12wk and 20wk assessment time points that pertain to the following events of Protocol Interest:

- Clinically significant increases in distress and/or psychosis
- Increased harm to self/harm to others
- Increased suicidal ideation/attempts
- Increased use of drugs/alcohol
- Emergency room visits for mental health concerns
- Access to crises services

**Serious Adverse Event (SAE):** The site Principal Investigator (PI), or delegate shall report all SAEs within 24 hours of becoming aware of the event to the Chief Investigator (CI), or delegate via email to MUSE.ARMS@cntw.nhs.uk using the SAE reporting form. These are events that:

- results in death;
- is life-threatening;
- requires hospitalisation or prolongation of existing hospitalisation;
- results in persistent or significant disability or incapacity;
- consists of a congenital anomaly or birth defect; or,
- is otherwise considered medically significant by the investigator.

**Urgent Safety Measures:** The site Principal Investigator (PI), or delegate, must inform the CI immediately by telephone (Tel. 01670844670 / alternatively Teams video/voice call for guy.dodgson@cntw.nhs.uk) of urgent safety measures defined above in section 11.5 (early withdrawal/changes to procedure due to safety concerns for staff or participants). This information shall be documented on the Urgent safety reporting form and submitted by email to [MUSE.ARMS@cntw.nhs.uk](mailto:MUSE.ARMS@cntw.nhs.uk). This is when the following applies:

- Early withdrawal of participant(s) due to safety concerns about the intervention or assessments
- Changes to procedures due to concerns about staff or participant safety

**Transition to Psychosis Checklist**

|                                                                               |           |           |           |           |           |           |           |           |                 |
|-------------------------------------------------------------------------------|-----------|-----------|-----------|-----------|-----------|-----------|-----------|-----------|-----------------|
| Insert date:                                                                  |           |           |           |           |           |           |           |           |                 |
|                                                                               | <b>S1</b> | <b>S2</b> | <b>S3</b> | <b>S4</b> | <b>S5</b> | <b>S6</b> | <b>S7</b> | <b>S8</b> | <b>Comments</b> |
| <b>Indication of Transition to Psychosis?</b><br><b>Add note to Rio/Paris</b> |           |           |           |           |           |           |           |           |                 |

**Transition to Psychosis Guidance:** The following information suggests potential transition to psychosis for this protocol:

- Clinical diagnosis using standard diagnostic classification systems DSM/ICD
- Clinical diagnosis using ARMS assessment schedule documented in clinical notes
- Transfer to the Early Intervention in Psychosis pathway
- Treated or untreated psychotic episode of one week's duration or longer
- Initiation of treatment with antipsychotics (3 or more weeks of treatment with antipsychotics at a dose of ≥ 5mg haloperidol or equivalent)

**Completed by**

|                                  |             |       |            |                           |
|----------------------------------|-------------|-------|------------|---------------------------|
| Participant ID (MUSE ID Number): | Print Name: | Role: | Signature: | Completed on (DD/MM/YYYY) |
|----------------------------------|-------------|-------|------------|---------------------------|



1 **Therapy Session measure**

2 **MUSE Therapist Pack**

MUSE ARMS Feasibility Trial; IRAS ID: 323903

3  
4  
5  
6 Session Number:

7  
8 Date:

9  
10 **Therapy Session measure**

11  
12  
13 **Please answer the following questions about the voices you experienced in the past week**

14 How frequent were the voices?

15  
16  
17 0% 10 20 30 40 50 60 70 80 90 100%  
18 Voices not present Once a day Voices always present

19  
20  
21  
22 Were the voices distressing? How much of the time?

23  
24 0% 10 20 30 40 50 60 70 80 90 100%  
25 Voices never distressing Voices were distressing about half of the times Voices always distressing

26  
27  
28  
29 **If relevant please answer the following questions about the visions you experienced in the past week**

30 How frequent were the visions?

31  
32  
33  
34  
35 0% 10 20 30 40 50 60 70 80 90 100%  
36 Visions not present Once a day Visions always present

37  
38  
39  
40 Were the vision distressing? How much of the time?

41  
42 0% 10 20 30 40 50 60 70 80 90 100%  
43 Visions never distressing Moderately distressing extremely distressing

44  
45  
46  
47 Overall, how distressing were the experiences listed above?

48  
49 0% 10 20 30 40 50 60 70 80 90 100%  
50 not at all distressing Moderately distressing extremely distressing

51  
52  
53  
54  
55  
56  
57  
58  
59 **Completed by**

|                                  |             |       |            |                           |
|----------------------------------|-------------|-------|------------|---------------------------|
| Participant ID (MUSE ID Number): | Print Name: | Role: | Signature: | Completed on (DD/MM/YYYY) |
|----------------------------------|-------------|-------|------------|---------------------------|



1 **Therapy Session measure**

2 **MUSE Therapist Pack**

MUSE ARMS Feasibility Trial; IRAS ID: 323903

3  
4  
5  
6 Session Number:

7  
8 Date:

9  
10 **Therapy Session measure**

11  
12  
13 **Please answer the following questions about the voices you experienced in the past week**

14 How frequent were the voices?

15  
16  
17 0% 10 20 30 40 50 60 70 80 90 100%  
18 Voices not present Once a day Voices always present

19  
20  
21  
22 Were the voices distressing? How much of the time?

23  
24 0% 10 20 30 40 50 60 70 80 90 100%  
25 Voices never distressing Voices were distressing about half of the times Voices always distressing

26  
27  
28  
29 **If relevant please answer the following questions about the visions you experienced in the past week**

30 How frequent were the visions?

31  
32  
33  
34  
35 0% 10 20 30 40 50 60 70 80 90 100%  
36 Visions not present Once a day Visions always present

37  
38  
39  
40 Were the vision distressing? How much of the time?

41  
42 0% 10 20 30 40 50 60 70 80 90 100%  
43 Visions never distressing Moderately distressing extremely distressing

44  
45  
46  
47 Overall, how distressing were the experiences listed above?

48  
49 0% 10 20 30 40 50 60 70 80 90 100%  
50 not at all distressing Moderately distressing extremely distressing

51  
52  
53  
54  
55  
56  
57  
58  
59 **Completed by**

|                                  |             |       |            |                           |
|----------------------------------|-------------|-------|------------|---------------------------|
| Participant ID (MUSE ID Number): | Print Name: | Role: | Signature: | Completed on (DD/MM/YYYY) |
|----------------------------------|-------------|-------|------------|---------------------------|

1 **Therapy Session measure**

2 **MUSE Therapist Pack**

MUSE ARMS Feasibility Trial; IRAS ID: 323903

6 Session Number:

8 Date:

10 **Therapy Session measure**

13 **Please answer the following questions about the voices you experienced in the past week**

15 How frequent were the voices?

17 0% 10 20 30 40 50 60 70 80 90 100%  
18 Voices not present Once a day Voices always present

22 Were the voices distressing? How much of the time?

24 0% 10 20 30 40 50 60 70 80 90 100%  
25 Voices never distressing Voices were distressing about half of the times Voices always distressing

30 **If relevant please answer the following questions about the visions you experienced in the past week**

32 How frequent were the visions?

36 0% 10 20 30 40 50 60 70 80 90 100%  
37 Visions not present Once a day Visions always present

40 Were the vision distressing? How much of the time?

42 0% 10 20 30 40 50 60 70 80 90 100%  
43 Visions never distressing Moderately distressing extremely distressing

47 Overall, how distressing were the experiences listed above?

49 0% 10 20 30 40 50 60 70 80 90 100%  
50 not at all distressing Moderately distressing extremely distressing

59 **Completed by**

|                                  |             |       |            |                           |
|----------------------------------|-------------|-------|------------|---------------------------|
| Participant ID (MUSE ID Number): | Print Name: | Role: | Signature: | Completed on (DD/MM/YYYY) |
|----------------------------------|-------------|-------|------------|---------------------------|







**Therapy Session measure**

**MUSE Therapist Pack**

MUSE ARMS Feasibility Trial; IRAS ID: 323903

Session Number:

Date:

**Therapy Session measure**

**Please answer the following questions about the voices you experienced in the past week**

How frequent were the voices?

0% 10 20 30 40 50 60 70 80 90 100%  
 Voices not present Once a day Voices always present

Were the voices distressing? How much of the time?

0% 10 20 30 40 50 60 70 80 90 100%  
 Voices never distressing Voices were distressing about half of the times Voices always distressing

**If relevant please answer the following questions about the visions you experienced in the past week**

How frequent were the visions?

0% 10 20 30 40 50 60 70 80 90 100%  
 Visions not present Once a day Visions always present

Were the vision distressing? How much of the time?

0% 10 20 30 40 50 60 70 80 90 100%  
 Visions never distressing Moderately distressing extremely distressing

Overall, how distressing were the experiences listed above?

0% 10 20 30 40 50 60 70 80 90 100%  
 not at all distressing Moderately distressing extremely distressing

**Completed by**

|                                  |             |       |            |                           |
|----------------------------------|-------------|-------|------------|---------------------------|
| Participant ID (MUSE ID Number): | Print Name: | Role: | Signature: | Completed on (DD/MM/YYYY) |
|----------------------------------|-------------|-------|------------|---------------------------|

1  
2  
3  
4  
5  
6  
7  
8  
9  
10  
11  
12  
13  
14  
15  
16  
17  
18  
19  
20  
21  
22  
23  
24  
25  
26  
27  
28  
29  
30  
31  
32  
33  
34  
35  
36  
37  
38  
39  
40  
41  
42  
43  
44  
45  
46  
47  
48  
49  
50  
51  
52  
53  
54  
55  
56  
57  
58  
59  
60

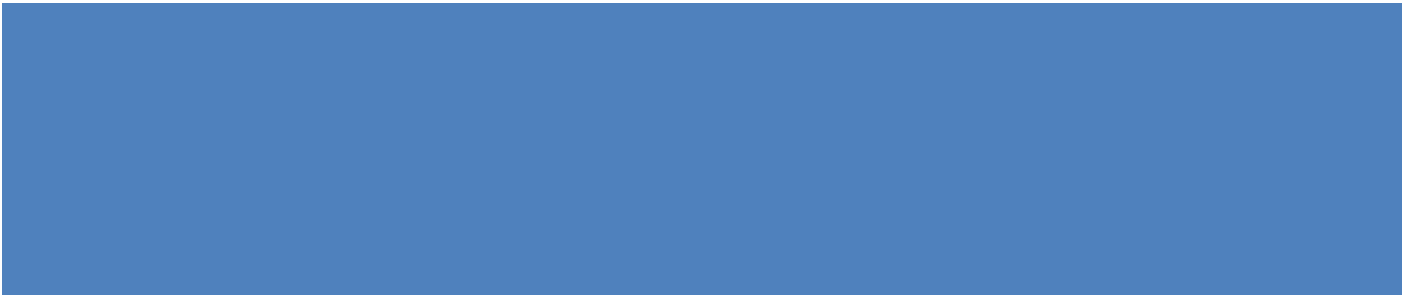

# TAU THERAPY THERAPIST PACK

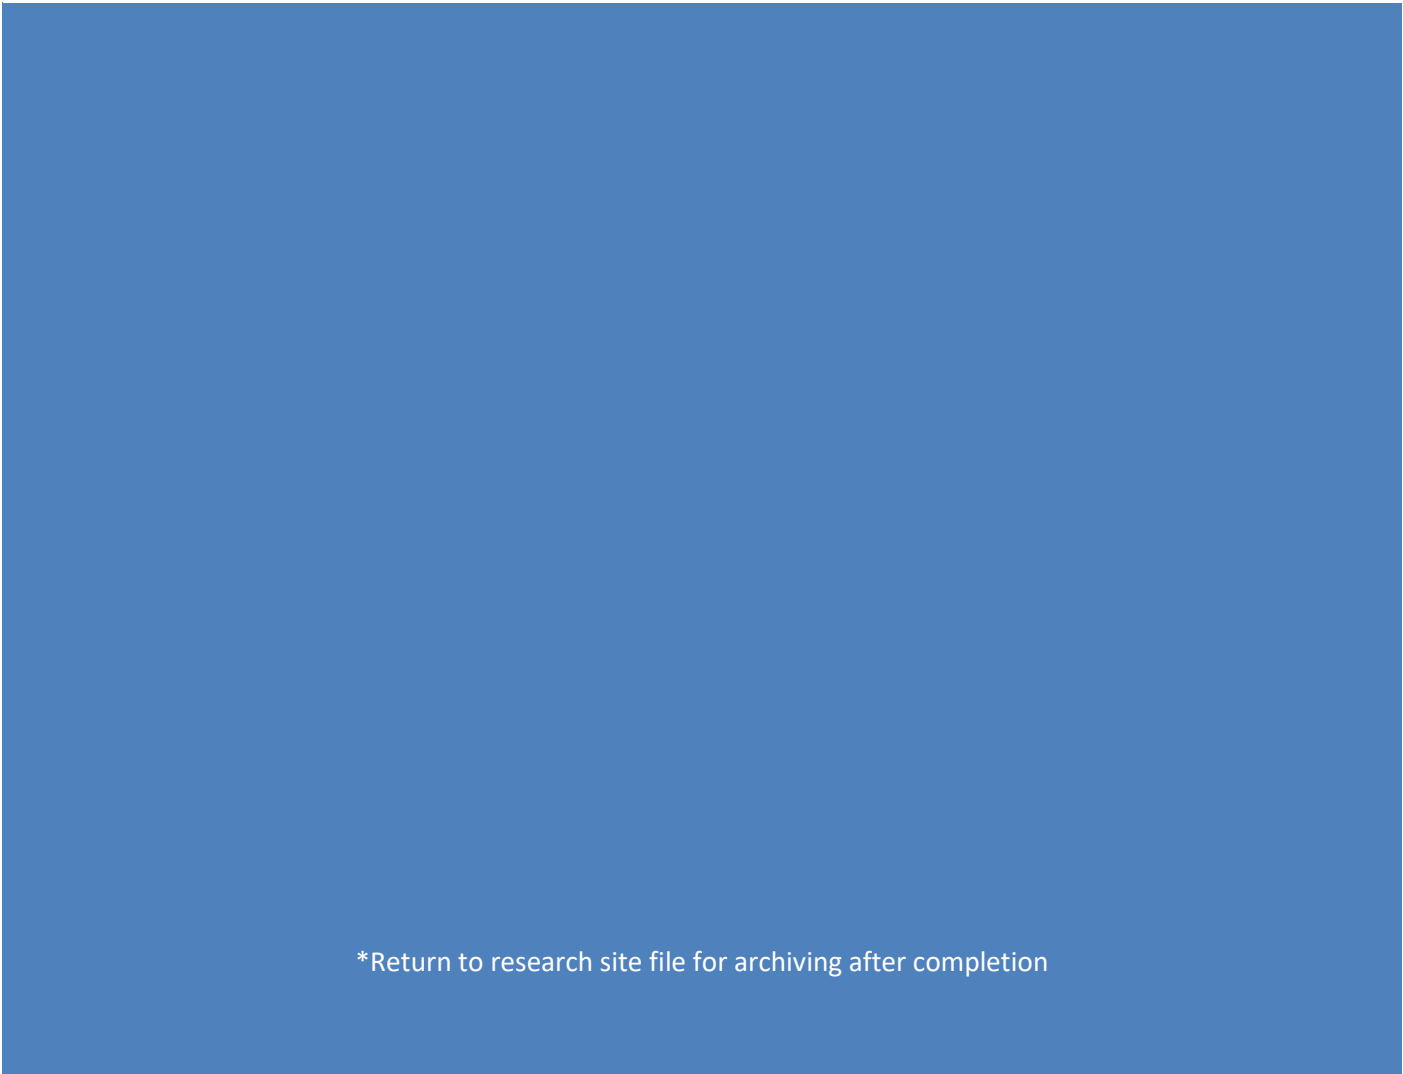

\*Return to research site file for archiving after completion

**Adherence Checklist: TAU Therapy Sessions**  
**(Please tick for used in any session)**

|                                                                                                                    |    |    |    |    |    |    |    |    |          |
|--------------------------------------------------------------------------------------------------------------------|----|----|----|----|----|----|----|----|----------|
| Insert Date:                                                                                                       |    |    |    |    |    |    |    |    |          |
| Insert length of session (minutes):                                                                                |    |    |    |    |    |    |    |    |          |
|                                                                                                                    | S1 | S2 | S3 | S4 | S5 | S6 | S7 | S8 | Comments |
| Was this a CBT session (Y/N)?                                                                                      |    |    |    |    |    |    |    |    |          |
| CBT Assessment                                                                                                     |    |    |    |    |    |    |    |    |          |
| Formulation                                                                                                        |    |    |    |    |    |    |    |    |          |
| Needs based emotional support                                                                                      |    |    |    |    |    |    |    |    |          |
| Social Support                                                                                                     |    |    |    |    |    |    |    |    |          |
| Normalisation                                                                                                      |    |    |    |    |    |    |    |    |          |
| Stress management                                                                                                  |    |    |    |    |    |    |    |    |          |
| Psychoeducation*<br><i>*Please describe if related to managing unusual sensory experiences in the comments box</i> |    |    |    |    |    |    |    |    |          |
| Other:                                                                                                             |    |    |    |    |    |    |    |    |          |
| Other:                                                                                                             |    |    |    |    |    |    |    |    |          |
| Other:                                                                                                             |    |    |    |    |    |    |    |    |          |

**Completed by**

|                                  |             |       |            |                           |
|----------------------------------|-------------|-------|------------|---------------------------|
| Participant ID (MUSE ID Number): | Print Name: | Role: | Signature: | Completed on (DD/MM/YYYY) |
|----------------------------------|-------------|-------|------------|---------------------------|

## Adverse Events Checklist

|                                                                        |           |           |           |           |           |           |           |           |                 |
|------------------------------------------------------------------------|-----------|-----------|-----------|-----------|-----------|-----------|-----------|-----------|-----------------|
| Insert date:                                                           |           |           |           |           |           |           |           |           |                 |
|                                                                        | <b>S1</b> | <b>S2</b> | <b>S3</b> | <b>S4</b> | <b>S5</b> | <b>S6</b> | <b>S7</b> | <b>S8</b> | <b>Comments</b> |
| <b>Adverse events of interest reported?</b><br><b>Add to Rio/Paris</b> |           |           |           |           |           |           |           |           |                 |
| <b>Serious Adverse Event? NB 24hour reporting deadline</b>             |           |           |           |           |           |           |           |           |                 |
| <b>Urgent Safety Measures? NB Phone PI immediately</b>                 |           |           |           |           |           |           |           |           |                 |

Adverse Events Guidance:

**Adverse Events. Record on Rio/Paris for collection by the Unblinded Researcher at the 12wk and 20wk assessment time points that pertain to the following events of Protocol Interest:**

- Clinically significant increases in distress and/or psychosis
- Increased harm to self/harm to others
- Increased suicidal ideation/attempts
- Increased use of drugs/alcohol
- Emergency room visits for mental health concerns
- Access to crises services

**Serious Adverse Event (SAE):** The site Principal Investigator (PI), or delegate shall report all SAEs within 24 hours of becoming aware of the event to the Chief Investigator (CI), or delegate via email to [MUSE.ARMS@cntw.nhs.uk](mailto:MUSE.ARMS@cntw.nhs.uk) using the SAE reporting form. These are events that:

- results in death;
- is life-threatening;
- requires hospitalisation or prolongation of existing hospitalisation;
- results in persistent or significant disability or incapacity;
- consists of a congenital anomaly or birth defect; or,
- is otherwise considered medically significant by the investigator.

**Urgent Safety Measures:** The site Principal Investigator (PI), or delegate, must inform the CI immediately by telephone (Tel. 01670844670 / alternatively Teams video/voice call for [guy.dodgson@cntw.nhs.uk](mailto:guy.dodgson@cntw.nhs.uk)) of urgent safety measures defined above in section 11.5 (early withdrawal/changes to procedure due to safety concerns for staff or participants). This information shall be documented on the Urgent safety reporting form and submitted by email to [MUSE.ARMS@cntw.nhs.uk](mailto:MUSE.ARMS@cntw.nhs.uk). This is when the following applies:

- Early withdrawal of participant(s) due to safety concerns about the intervention or assessments
- Changes to procedures due to concerns about staff or participant safety

## Transition to Psychosis Checklist

|                                                                               |           |           |           |           |           |           |           |           |                 |
|-------------------------------------------------------------------------------|-----------|-----------|-----------|-----------|-----------|-----------|-----------|-----------|-----------------|
| Insert date:                                                                  |           |           |           |           |           |           |           |           |                 |
|                                                                               | <b>S1</b> | <b>S2</b> | <b>S3</b> | <b>S4</b> | <b>S5</b> | <b>S6</b> | <b>S7</b> | <b>S8</b> | <b>Comments</b> |
| <b>Indication of Transition to Psychosis?</b><br><b>Add note to Rio/Paris</b> |           |           |           |           |           |           |           |           |                 |

Transition to Psychosis Guidance: The following information suggests potential transition to psychosis for this protocol:

- Clinical diagnosis using standard diagnostic classification systems DSM/ICD
- Clinical diagnosis using ARMS assessment schedule documented in clinical notes
- Transfer to the Early Intervention in Psychosis pathway
- Treated or untreated psychotic episode of one week's duration or longer
- Initiation of treatment with antipsychotics (3 or more weeks of treatment with antipsychotics at a dose of  $\geq 5$ mg haloperidol or equivalent)

**Completed by**

|                                  |             |       |            |                           |
|----------------------------------|-------------|-------|------------|---------------------------|
| Participant ID (MUSE ID Number): | Print Name: | Role: | Signature: | Completed on (DD/MM/YYYY) |
|----------------------------------|-------------|-------|------------|---------------------------|

1  
2  
3  
4  
5  
6  
7  
8  
9  
10  
11  
12  
13  
14  
15  
16  
17  
18  
19  
20  
21  
22  
23  
24  
25  
26  
27  
28  
29  
30  
31  
32  
33  
34  
35  
36  
37  
38  
39  
40  
41  
42  
43  
44  
45  
46  
47  
48  
49  
50  
51  
52  
53  
54  
55  
56  
57  
58  
59  
60

For peer review only

[Insert local site logos here]

IRAS Number: 323903 Study Title: MUSE ARMS Feasibility Trial.

Informed Consent Form [Version 2.0 23022023]

Centre Name: [e.g. CNTW / Other NHS Participating Organisation]

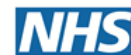

Cumbria, Northumberland,  
Tyne and Wear  
NHS Foundation Trust

Participant ID Number:

## MUSE ARMS Feasibility Trial

### INFORMED CONSENT FORM

|   |                                                                                                                                                                                                                                                                                                                                                                                                                                                                                                                                                    | Initial box<br>to agree  |
|---|----------------------------------------------------------------------------------------------------------------------------------------------------------------------------------------------------------------------------------------------------------------------------------------------------------------------------------------------------------------------------------------------------------------------------------------------------------------------------------------------------------------------------------------------------|--------------------------|
| 1 | I confirm that I have read the information sheet dated..... (Version.....) for the above study. I have had the opportunity to consider the information, ask questions and have had these answered satisfactorily.                                                                                                                                                                                                                                                                                                                                  | <input type="checkbox"/> |
| 2 | I understand that my participation is voluntary and that I am free to withdraw at any time without giving any reason, without my medical care or legal rights being affected.                                                                                                                                                                                                                                                                                                                                                                      | <input type="checkbox"/> |
| 3 | I understand that if I withdraw from the study, or need to be withdrawn due to becoming too unwell, the research team will keep the research data about me that they already have, and if you give consent to question 10 on this form they will continue to track long term outcomes via the MHSDS/medical notes unless you request that they do not.                                                                                                                                                                                             | <input type="checkbox"/> |
| 4 | I understand that relevant sections of my medical notes and data collected during the study, may be looked at by responsible individuals from <i>[Research site]</i> and from the research Sponsor CNTW NHS Foundation Trust, their representatives and regulatory authorities for the purposes of this research study, which includes audit and monitoring for research quality assurance. I give permission for these individuals to have access to my records in accordance with this study participant information sheet and informed consent. | <input type="checkbox"/> |
| 5 | I understand and agree that the information collected from me in the course of this study will be held and maintained by <i>[enter name of organisation(s) that will be storing the participant data]</i> and CNTW, and archived at <i>[enter name of organisation(s)]</i> and CNTW.                                                                                                                                                                                                                                                               | <input type="checkbox"/> |
| 6 | I agree to my NHS Care Team being informed of my participation in the study.                                                                                                                                                                                                                                                                                                                                                                                                                                                                       | <input type="checkbox"/> |
| 7 | I agree for a brief summary of the research assessments and any treatment sessions to be shared with my clinical team (i.e. added into my NHS care notes).                                                                                                                                                                                                                                                                                                                                                                                         | <input type="checkbox"/> |
| 8 | OPTIONAL: I consent to the use of audio recording of my treatment sessions to check the quality of the MUSE treatment. I understand recordings will follow NHS data security standards for storage and will be destroyed once they are checked for treatment quality.                                                                                                                                                                                                                                                                              | <input type="checkbox"/> |

**Circle decision: YES / NO**

|    |                                                                                                                                                                                                                                                                                                                                                                                                                                                                                                                                                                       |                          |
|----|-----------------------------------------------------------------------------------------------------------------------------------------------------------------------------------------------------------------------------------------------------------------------------------------------------------------------------------------------------------------------------------------------------------------------------------------------------------------------------------------------------------------------------------------------------------------------|--------------------------|
| 9  | <p>OPTIONAL: I consent to take part in an interview about my experience in the trial. I recognise not everyone is asked to do this and that I can change my mind at any time. I am aware that these reflective interviews are audio recorded anonymously (using an ID code as identifier) and then transcribed during which any further potential personal identifying information is removed ahead of analysis of research findings.</p> <p style="text-align: right;"><b>Circle decision: YES / NO</b></p>                                                          | <input type="checkbox"/> |
| 10 | <p>OPTIONAL: I consent to my medical records being accessed by the central research team at CNTW to collect follow-up data from medical databases to look at long term outcomes including use of hospital inpatient services. Medical databases include Hospital Records, and the Mental Health Services Data Set (MHSDS). This requires a copy of my consent form and my NHS record number to be sent securely to CNTW for processing and storage in the trial master file, which I agree to.</p> <p style="text-align: right;"><b>Circle decision: YES / NO</b></p> | <input type="checkbox"/> |
| 11 | <p>I understand that the information collected about me will be used to support the writing up of research findings. The data in an anonymised format will be shared with researchers for this study who have a role in analysing and writing up data.</p>                                                                                                                                                                                                                                                                                                            | <input type="checkbox"/> |
| 12 | <p>I understand that in accordance with openness of data findings the anonymised data set from the study may be published in open access and or for wider research. My personal details will not be shared.</p>                                                                                                                                                                                                                                                                                                                                                       | <input type="checkbox"/> |
| 13 | <p>I agree to take part in the above study.</p>                                                                                                                                                                                                                                                                                                                                                                                                                                                                                                                       | <input type="checkbox"/> |
| 14 | <p>OPTIONAL: I would like to be contacted with end of study information on the trial and my preferred contact method is: email / post / text message (<i>circle as appropriate</i>). Contact details will be obtained from medical records.</p> <p style="text-align: right;"><b>Circle decision: YES / NO</b></p>                                                                                                                                                                                                                                                    | <input type="checkbox"/> |

|                                                                                                                                                                                                                                                                                            |             |
|--------------------------------------------------------------------------------------------------------------------------------------------------------------------------------------------------------------------------------------------------------------------------------------------|-------------|
| <b>Name of Participant</b>                                                                                                                                                                                                                                                                 |             |
| <b>Signature of Participant</b>                                                                                                                                                                                                                                                            | <b>Date</b> |
| <b><i>*I certify that the information provided was discussed in a language accessible to the participant. That they retained and understood the information for a sufficient period in order to weigh up their decision and communicate their decision regarding informed consent.</i></b> |             |
| <b>*Name of Researcher Obtaining Consent</b>                                                                                                                                                                                                                                               |             |
| <b>*Signature of Researcher Obtaining Consent</b>                                                                                                                                                                                                                                          | <b>Date</b> |



[Insert local site logos here]

IRAS Number: Study Title: MUSE ARMS Feasibility Trial.

YP Assent Form [Version 2.0 23022023]

Centre Name: [e.g. CNTW / Other NHS / Participating Organisation]



Cumbria, Northumberland,  
Tyne and Wear  
NHS Foundation Trust

Participant ID Number:

## MUSE ARMS Feasibility Trial

### YP ASSENT FORM

|   |                                                                                                                                                                                                                                                                                                                                                         | Initial box<br>to agree  |
|---|---------------------------------------------------------------------------------------------------------------------------------------------------------------------------------------------------------------------------------------------------------------------------------------------------------------------------------------------------------|--------------------------|
| 1 | I confirm that I have had time to think about this study. I have had the time to consider the information, ask questions, and have had helpful answers.                                                                                                                                                                                                 | <input type="checkbox"/> |
| 2 | I understand that taking part is my choice. I am free to stop or take a break at any time without giving any reason.                                                                                                                                                                                                                                    | <input type="checkbox"/> |
| 3 | I understand that if I withdraw from the study, or need to be withdrawn due to becoming too unwell, the research team will keep the research data about me that they have already collected, and if you give assent to question 10 on this form they will continue to track long term outcomes via medical records unless you request that they do not. | <input type="checkbox"/> |
| 4 | I understand that the research team will only collect information that helps answer the research questions.                                                                                                                                                                                                                                             | <input type="checkbox"/> |
| 5 | I understand that my medical notes and the information collected from me will be looked after by the NHS trusts involved in the study for research data quality checks.                                                                                                                                                                                 | <input type="checkbox"/> |
| 6 | I agree to my NHS Care Team being told about of my participation in the study.                                                                                                                                                                                                                                                                          | <input type="checkbox"/> |
| 7 | I agree for a short summary of the research assessments and any treatment sessions to be shared with my clinical team (added into my NHS care notes).                                                                                                                                                                                                   | <input type="checkbox"/> |
| 8 | OPTIONAL: I agree to the audio recording of my treatment sessions. This is to check the treatment is being done properly and not what I am saying.<br>I understand recordings will follow NHS data security standards for storage and will be destroyed once they are checked.                                                                          | <input type="checkbox"/> |

**Circle decision: YES / NO**

|    |                                                                                                                                                                                                                                                                                                                                                                                           |                          |
|----|-------------------------------------------------------------------------------------------------------------------------------------------------------------------------------------------------------------------------------------------------------------------------------------------------------------------------------------------------------------------------------------------|--------------------------|
| 9  | OPTIONAL: I agree to take part in an interview about my experience of the study*. These interviews are recorded confidentially and then written out; any identifying information is removed (it's anonymous). *Not everyone is asked to do this.<br><b>Circle decision: YES / NO</b>                                                                                                      | <input type="checkbox"/> |
| 10 | OPTIONAL : I agree to my medical records being accessed to collect data to look at long term outcomes including use of hospital inpatient services. This requires a copy of my assent form & parent/guardian consent form and my NHS record number to be sent securely to CNTW for processing and storage in the trial master file, which I agree to.<br><b>Circle decision: YES / NO</b> | <input type="checkbox"/> |
| 11 | It has been explained that the information collected about me is anonymised (no one will know my name). The information collected is used by researchers for this study who have a job analysing and writing up the findings.                                                                                                                                                             | <input type="checkbox"/> |
| 12 | It has been explained that the anonymised data set from the study may be published in open access for wider research. My personal details will not be shared (no one will know my name).                                                                                                                                                                                                  | <input type="checkbox"/> |
| 13 | I would like to take part in the study.                                                                                                                                                                                                                                                                                                                                                   | <input type="checkbox"/> |
| 14 | OPTIONAL: I would like to be sent end of study information on how it went overall. My preferred contact method is: email / post / text message ( <i>circle preferred</i> ). Contact details will be obtained from medical records.<br><b>Circle decision: YES / NO</b>                                                                                                                    | <input type="checkbox"/> |

|                                                                                                                                                                                                                                                          |             |
|----------------------------------------------------------------------------------------------------------------------------------------------------------------------------------------------------------------------------------------------------------|-------------|
| <b>Name of Participant</b>                                                                                                                                                                                                                               |             |
| <b>Signature of Participant</b>                                                                                                                                                                                                                          | <b>Date</b> |
| <i>*I certify that the information provided was discussed in a language accessible to the participant. That they retained and understood the information for a sufficient period in order to weigh up their decision and communicate their decision.</i> |             |
| <b>*Name of Researcher Obtaining Assent</b>                                                                                                                                                                                                              |             |
| <b>*Signature of Researcher Obtaining Assent</b>                                                                                                                                                                                                         | <b>Date</b> |

[Insert local site logos here]

IRAS Number: 323903 Study Title: MUSE ARMS Feasibility Trial.

Parent/Guardian Consent Form [Version 2.0 23022023]

Centre Name: [e.g. CNTW / Other NHS Participating Organisation]

Participant ID Number:

## MUSE ARMS Feasibility Trial

### PARENT/GUARDIAN INFORMED CONSENT FORM

|   |                                                                                                                                                                                                                                                                                                                                                                                                                                                                                                                                                                                                            | Initial box<br>to agree  |
|---|------------------------------------------------------------------------------------------------------------------------------------------------------------------------------------------------------------------------------------------------------------------------------------------------------------------------------------------------------------------------------------------------------------------------------------------------------------------------------------------------------------------------------------------------------------------------------------------------------------|--------------------------|
| 1 | I confirm that I have read the parent/guardian information sheet dated.....<br>(Version.....) for the above study. I have had the opportunity to consider the<br>information, ask questions and have had these answered satisfactorily.                                                                                                                                                                                                                                                                                                                                                                    | <input type="checkbox"/> |
| 2 | I understand that my child's participation is voluntary and that they are free to withdraw<br>at any time without giving any reason, without their medical care or legal rights being<br>affected.                                                                                                                                                                                                                                                                                                                                                                                                         | <input type="checkbox"/> |
| 3 | I understand that if my child withdraws from the study, or needs to be withdrawn due to<br>becoming too unwell, the research team will keep the research data about my child that<br>they already have, and if you give consent to question 10 on this form they will continue<br>to track long term outcomes via the MHSDS/medical notes unless you request that they<br>do not.                                                                                                                                                                                                                          | <input type="checkbox"/> |
| 4 | I understand that relevant sections of my child's medical notes and data collected<br>during the study, may be looked at by responsible individuals from [Research site] and<br>from the research Sponsor CNTW NHS Foundation Trust, their representatives and<br>regulatory authorities for the purposes of this research study, which includes audit and<br>monitoring for research quality assurance. I give permission for these individuals to<br>have access to these records in accordance with this study participant information<br>sheet and informed consent and my child's agreement (assent). | <input type="checkbox"/> |
| 5 | I understand and agree that the information collected about my child in the course of<br>this study will be held and maintained by [enter name of organisation(s) that will be<br>storing the participant data], and CNTW and archived at [enter name of organisation(s)]<br>and CNTW.                                                                                                                                                                                                                                                                                                                     | <input type="checkbox"/> |
| 6 | I agree to my child's NHS Care Team being informed of their participation in the study.                                                                                                                                                                                                                                                                                                                                                                                                                                                                                                                    | <input type="checkbox"/> |
| 7 | I agree for a brief summary of the research assessments and any treatment sessions to<br>be shared with my child's clinical team (i.e. added into NHS care notes).                                                                                                                                                                                                                                                                                                                                                                                                                                         | <input type="checkbox"/> |
| 8 | OPTIONAL: I consent to the use of audio recording of my child's treatment sessions, so<br>long as my child agrees to this, to check the quality of the MUSE treatment. I<br>understand recordings will follow NHS data security standards for storage and will be<br>destroyed once they are checked for treatment quality.                                                                                                                                                                                                                                                                                | <input type="checkbox"/> |

**Circle decision: YES / NO**

|    |                                                                                                                                                                                                                                                                                                                                                                                                                                                                                                                                                                       |                          |
|----|-----------------------------------------------------------------------------------------------------------------------------------------------------------------------------------------------------------------------------------------------------------------------------------------------------------------------------------------------------------------------------------------------------------------------------------------------------------------------------------------------------------------------------------------------------------------------|--------------------------|
| 9  | <p>OPTIONAL: I consent to my child to take part in an interview about their experience in the trial, if they wish to do this.</p> <p>I recognise not everyone is asked to do this and that my child can change their mind at any time. I am aware that these reflective interviews are audio recorded anonymously (using an ID code as identifier) and then transcribed during which any further potential personal identifying information is removed ahead of analysis of research findings.</p> <p style="text-align: right;"><b>Circle decision: YES / NO</b></p> | <input type="checkbox"/> |
| 10 | <p>I consent to my child's medical records being accessed to collect follow-up data from medical databases to look at long term outcomes including use of hospital inpatient services, so long as they are in agreement with this. Medical databases Hospital Records, and the Mental Health Services Data Set (MHSDS). This requires a copy of my child's consent form and NHS record number to be sent securely to CNTW for processing and storage in the trial master file, which I agree to.</p>                                                                  | <input type="checkbox"/> |
| 11 | <p>I understand that the information collected about my child will be used to support the writing up of research findings. The data in an anonymised format will be shared with researchers for this study who have a role in analysing and writing up data.</p>                                                                                                                                                                                                                                                                                                      | <input type="checkbox"/> |
| 12 | <p>I understand that in accordance with openness of data findings the anonymised data set from the study may be published in open access and or for wider research. My child's personal details will not be shared.</p>                                                                                                                                                                                                                                                                                                                                               | <input type="checkbox"/> |
| 13 | <p>I agree for my child to take part in the above study if they wish to do so.</p>                                                                                                                                                                                                                                                                                                                                                                                                                                                                                    | <input type="checkbox"/> |
| 14 | <p>OPTIONAL: I agree for my child to be contacted with end of study information on the trial and their preferred contact method is: email / post / text message (<i>circle as appropriate</i>). Contact details will be obtained from medical records.</p> <p style="text-align: right;"><b>Circle decision: YES / NO</b></p>                                                                                                                                                                                                                                         | <input type="checkbox"/> |

|                                                                                                                                                                                                                                                                                                       |             |
|-------------------------------------------------------------------------------------------------------------------------------------------------------------------------------------------------------------------------------------------------------------------------------------------------------|-------------|
| <b>Name of Parent/Guardian</b>                                                                                                                                                                                                                                                                        |             |
| <b>Signature of Parent/Guardian</b>                                                                                                                                                                                                                                                                   | <b>Date</b> |
| <p><b><i>*I certify that the information provided was discussed in a language accessible to the Parent/Guardian. That they retained and understood the information for a sufficient period in order to weigh up their decision and communicate their decision regarding informed consent.</i></b></p> |             |
| <b>*Name of Researcher Obtaining Consent</b>                                                                                                                                                                                                                                                          |             |
| <b>*Signature of Researcher Obtaining Consent</b>                                                                                                                                                                                                                                                     | <b>Date</b> |

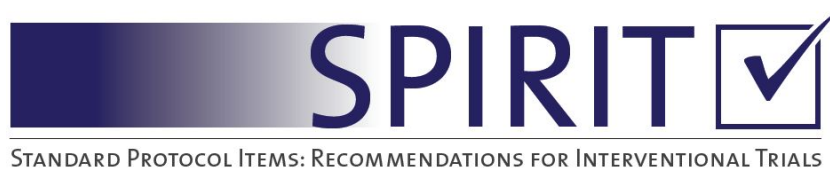

SPIRIT 2013 Checklist: Recommended items to address in a clinical trial protocol and related documents\*

| Section/item                      | Item No | Description                                                                                                                                                                                                                                                                              |                                     |
|-----------------------------------|---------|------------------------------------------------------------------------------------------------------------------------------------------------------------------------------------------------------------------------------------------------------------------------------------------|-------------------------------------|
| <b>Administrative information</b> |         |                                                                                                                                                                                                                                                                                          |                                     |
| Title                             | 1       | Descriptive title identifying the study design, population, interventions, and, if applicable, trial acronym                                                                                                                                                                             | <input checked="" type="checkbox"/> |
| Trial registration                | 2a      | Trial identifier and registry name. If not yet registered, name of intended registry                                                                                                                                                                                                     | <input checked="" type="checkbox"/> |
|                                   | 2b      | All items from the World Health Organization Trial Registration Data Set                                                                                                                                                                                                                 | <input type="checkbox"/>            |
| Protocol version                  | 3       | Date and version identifier                                                                                                                                                                                                                                                              | <input checked="" type="checkbox"/> |
| Funding                           | 4       | Sources and types of financial, material, and other support                                                                                                                                                                                                                              | <input checked="" type="checkbox"/> |
| Roles and responsibilities        | 5a      | Names, affiliations, and roles of protocol contributors                                                                                                                                                                                                                                  | <input checked="" type="checkbox"/> |
|                                   | 5b      | Name and contact information for the trial sponsor                                                                                                                                                                                                                                       | <input checked="" type="checkbox"/> |
|                                   | 5c      | Role of study sponsor and funders, if any, in study design; collection, management, analysis, and interpretation of data; writing of the report; and the decision to submit the report for publication, including whether they will have ultimate authority over any of these activities | <input checked="" type="checkbox"/> |
|                                   | 5d      | Composition, roles, and responsibilities of the coordinating centre, steering committee, endpoint adjudication committee, data management team, and other individuals or groups overseeing the trial, if applicable (see Item 21a for data monitoring committee)                         | <input checked="" type="checkbox"/> |

|    |                                                           |     |                                                                                                                                                                                                                                                                                                                                                                                |                                     |
|----|-----------------------------------------------------------|-----|--------------------------------------------------------------------------------------------------------------------------------------------------------------------------------------------------------------------------------------------------------------------------------------------------------------------------------------------------------------------------------|-------------------------------------|
| 1  | <b>Introduction</b>                                       |     |                                                                                                                                                                                                                                                                                                                                                                                |                                     |
| 2  |                                                           |     |                                                                                                                                                                                                                                                                                                                                                                                |                                     |
| 3  |                                                           |     |                                                                                                                                                                                                                                                                                                                                                                                |                                     |
| 4  | Background and rationale                                  | 6a  | Description of research question and justification for undertaking the trial, including summary of relevant studies (published and unpublished) examining benefits and harms for each intervention                                                                                                                                                                             | <input type="checkbox"/>            |
| 5  |                                                           |     |                                                                                                                                                                                                                                                                                                                                                                                |                                     |
| 6  |                                                           |     |                                                                                                                                                                                                                                                                                                                                                                                |                                     |
| 7  |                                                           |     |                                                                                                                                                                                                                                                                                                                                                                                |                                     |
| 8  |                                                           | 6b  | Explanation for choice of comparators                                                                                                                                                                                                                                                                                                                                          | <input checked="" type="checkbox"/> |
| 9  |                                                           |     |                                                                                                                                                                                                                                                                                                                                                                                |                                     |
| 10 |                                                           |     |                                                                                                                                                                                                                                                                                                                                                                                |                                     |
| 11 |                                                           |     |                                                                                                                                                                                                                                                                                                                                                                                |                                     |
| 12 |                                                           |     |                                                                                                                                                                                                                                                                                                                                                                                |                                     |
| 13 | Objectives                                                | 7   | Specific objectives or hypotheses                                                                                                                                                                                                                                                                                                                                              | <input checked="" type="checkbox"/> |
| 14 |                                                           |     |                                                                                                                                                                                                                                                                                                                                                                                |                                     |
| 15 |                                                           |     |                                                                                                                                                                                                                                                                                                                                                                                |                                     |
| 16 |                                                           |     |                                                                                                                                                                                                                                                                                                                                                                                |                                     |
| 17 |                                                           |     |                                                                                                                                                                                                                                                                                                                                                                                |                                     |
| 18 | Trial design                                              | 8   | Description of trial design including type of trial (eg, parallel group, crossover, factorial, single group), allocation ratio, and framework (eg, superiority, equivalence, noninferiority, exploratory)                                                                                                                                                                      | <input checked="" type="checkbox"/> |
| 19 |                                                           |     |                                                                                                                                                                                                                                                                                                                                                                                |                                     |
| 20 |                                                           |     |                                                                                                                                                                                                                                                                                                                                                                                |                                     |
| 21 |                                                           |     |                                                                                                                                                                                                                                                                                                                                                                                |                                     |
| 22 |                                                           |     |                                                                                                                                                                                                                                                                                                                                                                                |                                     |
| 23 |                                                           |     |                                                                                                                                                                                                                                                                                                                                                                                |                                     |
| 24 |                                                           |     |                                                                                                                                                                                                                                                                                                                                                                                |                                     |
| 25 | <b>Methods: Participants, interventions, and outcomes</b> |     |                                                                                                                                                                                                                                                                                                                                                                                |                                     |
| 26 |                                                           |     |                                                                                                                                                                                                                                                                                                                                                                                |                                     |
| 27 | Study setting                                             | 9   | Description of study settings (eg, community clinic, academic hospital) and list of countries where data will be collected. Reference to where list of study sites can be obtained                                                                                                                                                                                             | <input checked="" type="checkbox"/> |
| 28 |                                                           |     |                                                                                                                                                                                                                                                                                                                                                                                |                                     |
| 29 |                                                           |     |                                                                                                                                                                                                                                                                                                                                                                                |                                     |
| 30 |                                                           |     |                                                                                                                                                                                                                                                                                                                                                                                |                                     |
| 31 | Eligibility criteria                                      | 10  | Inclusion and exclusion criteria for participants. If applicable, eligibility criteria for study centres and individuals who will perform the interventions (eg, surgeons, psychotherapists)                                                                                                                                                                                   | <input checked="" type="checkbox"/> |
| 32 |                                                           |     |                                                                                                                                                                                                                                                                                                                                                                                |                                     |
| 33 |                                                           |     |                                                                                                                                                                                                                                                                                                                                                                                |                                     |
| 34 |                                                           |     |                                                                                                                                                                                                                                                                                                                                                                                |                                     |
| 35 |                                                           |     |                                                                                                                                                                                                                                                                                                                                                                                |                                     |
| 36 | Interventions                                             | 11a | Interventions for each group with sufficient detail to allow replication, including how and when they will be administered                                                                                                                                                                                                                                                     | <input checked="" type="checkbox"/> |
| 37 |                                                           |     |                                                                                                                                                                                                                                                                                                                                                                                |                                     |
| 38 |                                                           | 11b | Criteria for discontinuing or modifying allocated interventions for a given trial participant (eg, drug dose change in response to harms, participant request, or improving/worsening disease)                                                                                                                                                                                 | <input type="checkbox"/>            |
| 39 |                                                           |     |                                                                                                                                                                                                                                                                                                                                                                                |                                     |
| 40 |                                                           | 11c | Strategies to improve adherence to intervention protocols, and any procedures for monitoring adherence (eg, drug tablet return, laboratory tests)                                                                                                                                                                                                                              | <input type="checkbox"/>            |
| 41 |                                                           |     |                                                                                                                                                                                                                                                                                                                                                                                |                                     |
| 42 |                                                           | 11d | Relevant concomitant care and interventions that are permitted or prohibited during the trial                                                                                                                                                                                                                                                                                  | <input type="checkbox"/>            |
| 43 |                                                           |     |                                                                                                                                                                                                                                                                                                                                                                                |                                     |
| 44 |                                                           |     |                                                                                                                                                                                                                                                                                                                                                                                |                                     |
| 45 |                                                           |     |                                                                                                                                                                                                                                                                                                                                                                                |                                     |
| 46 |                                                           |     |                                                                                                                                                                                                                                                                                                                                                                                |                                     |
| 47 |                                                           |     |                                                                                                                                                                                                                                                                                                                                                                                |                                     |
| 48 |                                                           |     |                                                                                                                                                                                                                                                                                                                                                                                |                                     |
| 49 |                                                           |     |                                                                                                                                                                                                                                                                                                                                                                                |                                     |
| 50 |                                                           |     |                                                                                                                                                                                                                                                                                                                                                                                |                                     |
| 51 |                                                           |     |                                                                                                                                                                                                                                                                                                                                                                                |                                     |
| 52 |                                                           |     |                                                                                                                                                                                                                                                                                                                                                                                |                                     |
| 53 | Outcomes                                                  | 12  | Primary, secondary, and other outcomes, including the specific measurement variable (eg, systolic blood pressure), analysis metric (eg, change from baseline, final value, time to event), method of aggregation (eg, median, proportion), and time point for each outcome. Explanation of the clinical relevance of chosen efficacy and harm outcomes is strongly recommended | <input type="checkbox"/>            |
| 54 |                                                           |     |                                                                                                                                                                                                                                                                                                                                                                                |                                     |
| 55 |                                                           |     |                                                                                                                                                                                                                                                                                                                                                                                |                                     |
| 56 |                                                           |     |                                                                                                                                                                                                                                                                                                                                                                                |                                     |
| 57 |                                                           |     |                                                                                                                                                                                                                                                                                                                                                                                |                                     |
| 58 |                                                           |     |                                                                                                                                                                                                                                                                                                                                                                                |                                     |
| 59 |                                                           |     |                                                                                                                                                                                                                                                                                                                                                                                |                                     |
| 60 |                                                           |     |                                                                                                                                                                                                                                                                                                                                                                                |                                     |

|                                                                     |     |                                                                                                                                                                                                                                                                                                                                                                                                              |                                                                                       |
|---------------------------------------------------------------------|-----|--------------------------------------------------------------------------------------------------------------------------------------------------------------------------------------------------------------------------------------------------------------------------------------------------------------------------------------------------------------------------------------------------------------|---------------------------------------------------------------------------------------|
| Participant timeline                                                | 13  | Time schedule of enrolment, interventions (including any run-ins and washouts), assessments, and visits for participants. A schematic diagram is highly recommended (see Figure)                                                                                                                                                                                                                             |    |
| Sample size                                                         | 14  | Estimated number of participants needed to achieve study objectives and how it was determined, including clinical and statistical assumptions supporting any sample size calculations                                                                                                                                                                                                                        |    |
| Recruitment                                                         | 15  | Strategies for achieving adequate participant enrolment to reach target sample size                                                                                                                                                                                                                                                                                                                          |    |
| <b>Methods: Assignment of interventions (for controlled trials)</b> |     |                                                                                                                                                                                                                                                                                                                                                                                                              |                                                                                       |
| Allocation:                                                         |     |                                                                                                                                                                                                                                                                                                                                                                                                              |                                                                                       |
| Sequence generation                                                 | 16a | Method of generating the allocation sequence (eg, computer-generated random numbers), and list of any factors for stratification. To reduce predictability of a random sequence, details of any planned restriction (eg, blocking) should be provided in a separate document that is unavailable to those who enrol participants or assign interventions                                                     |    |
| Allocation concealment mechanism                                    | 16b | Mechanism of implementing the allocation sequence (eg, central telephone; sequentially numbered, opaque, sealed envelopes), describing any steps to conceal the sequence until interventions are assigned                                                                                                                                                                                                    |    |
| Implementation                                                      | 16c | Who will generate the allocation sequence, who will enrol participants, and who will assign participants to interventions                                                                                                                                                                                                                                                                                    |  |
| Blinding (masking)                                                  | 17a | Who will be blinded after assignment to interventions (eg, trial participants, care providers, outcome assessors, data analysts), and how                                                                                                                                                                                                                                                                    |  |
|                                                                     | 17b | If blinded, circumstances under which unblinding is permissible, and procedure for revealing a participant's allocated intervention during the trial                                                                                                                                                                                                                                                         |  |
| <b>Methods: Data collection, management, and analysis</b>           |     |                                                                                                                                                                                                                                                                                                                                                                                                              |                                                                                       |
| Data collection methods                                             | 18a | Plans for assessment and collection of outcome, baseline, and other trial data, including any related processes to promote data quality (eg, duplicate measurements, training of assessors) and a description of study instruments (eg, questionnaires, laboratory tests) along with their reliability and validity, if known. Reference to where data collection forms can be found, if not in the protocol |  |
|                                                                     | 18b | Plans to promote participant retention and complete follow-up, including list of any outcome data to be collected for participants who discontinue or deviate from intervention protocols                                                                                                                                                                                                                    |  |

|    |                                 |     |                                                                                                                                                                                                                                                                                                                                       |
|----|---------------------------------|-----|---------------------------------------------------------------------------------------------------------------------------------------------------------------------------------------------------------------------------------------------------------------------------------------------------------------------------------------|
| 1  |                                 |     |                                                                                                                                                                                                                                                                                                                                       |
| 2  | Data management                 | 19  | Plans for data entry, coding, security, and storage, including any related processes to promote data quality (eg, double data entry; range checks for data values). Reference to where details of data management procedures can be found, if not in the protocol                                                                     |
| 3  |                                 |     |                                                                                                                                                                                                                                                                                                                                       |
| 4  |                                 |     |                                                                                                                                                                                                                                                                                                                                       |
| 5  |                                 |     |                                                                                                                                                                                                                                                                                                                                       |
| 6  |                                 |     |                                                                                                                                                                                                                                                                                                                                       |
| 7  | Statistical methods             | 20a | Statistical methods for analysing primary and secondary outcomes. Reference to where other details of the statistical analysis plan can be found, if not in the protocol                                                                                                                                                              |
| 8  |                                 |     |                                                                                                                                                                                                                                                                                                                                       |
| 9  |                                 |     |                                                                                                                                                                                                                                                                                                                                       |
| 10 |                                 |     |                                                                                                                                                                                                                                                                                                                                       |
| 11 |                                 |     |                                                                                                                                                                                                                                                                                                                                       |
| 12 |                                 | 20b | Methods for any additional analyses (eg, subgroup and adjusted analyses)                                                                                                                                                                                                                                                              |
| 13 |                                 |     |                                                                                                                                                                                                                                                                                                                                       |
| 14 |                                 |     |                                                                                                                                                                                                                                                                                                                                       |
| 15 |                                 | 20c | Definition of analysis population relating to protocol non-adherence (eg, as randomised analysis), and any statistical methods to handle missing data (eg, multiple imputation)                                                                                                                                                       |
| 16 |                                 |     |                                                                                                                                                                                                                                                                                                                                       |
| 17 |                                 |     |                                                                                                                                                                                                                                                                                                                                       |
| 18 |                                 |     |                                                                                                                                                                                                                                                                                                                                       |
| 19 |                                 |     |                                                                                                                                                                                                                                                                                                                                       |
| 20 | <b>Methods: Monitoring</b>      |     |                                                                                                                                                                                                                                                                                                                                       |
| 21 |                                 |     |                                                                                                                                                                                                                                                                                                                                       |
| 22 | Data monitoring                 | 21a | Composition of data monitoring committee (DMC); summary of its role and reporting structure; statement of whether it is independent from the sponsor and competing interests; and reference to where further details about its charter can be found, if not in the protocol. Alternatively, an explanation of why a DMC is not needed |
| 23 |                                 |     |                                                                                                                                                                                                                                                                                                                                       |
| 24 |                                 |     |                                                                                                                                                                                                                                                                                                                                       |
| 25 |                                 |     |                                                                                                                                                                                                                                                                                                                                       |
| 26 |                                 |     |                                                                                                                                                                                                                                                                                                                                       |
| 27 |                                 |     |                                                                                                                                                                                                                                                                                                                                       |
| 28 |                                 |     |                                                                                                                                                                                                                                                                                                                                       |
| 29 |                                 | 21b | Description of any interim analyses and stopping guidelines, including who will have access to these interim results and make the final decision to terminate the trial                                                                                                                                                               |
| 30 |                                 |     |                                                                                                                                                                                                                                                                                                                                       |
| 31 |                                 |     |                                                                                                                                                                                                                                                                                                                                       |
| 32 |                                 |     |                                                                                                                                                                                                                                                                                                                                       |
| 33 | Harms                           | 22  | Plans for collecting, assessing, reporting, and managing solicited and spontaneously reported adverse events and other unintended effects of trial interventions or trial conduct                                                                                                                                                     |
| 34 |                                 |     |                                                                                                                                                                                                                                                                                                                                       |
| 35 |                                 |     |                                                                                                                                                                                                                                                                                                                                       |
| 36 |                                 |     |                                                                                                                                                                                                                                                                                                                                       |
| 37 |                                 |     |                                                                                                                                                                                                                                                                                                                                       |
| 38 | Auditing                        | 23  | Frequency and procedures for auditing trial conduct, if any, and whether the process will be independent from investigators and the sponsor                                                                                                                                                                                           |
| 39 |                                 |     |                                                                                                                                                                                                                                                                                                                                       |
| 40 |                                 |     |                                                                                                                                                                                                                                                                                                                                       |
| 41 |                                 |     |                                                                                                                                                                                                                                                                                                                                       |
| 42 |                                 |     |                                                                                                                                                                                                                                                                                                                                       |
| 43 | <b>Ethics and dissemination</b> |     |                                                                                                                                                                                                                                                                                                                                       |
| 44 |                                 |     |                                                                                                                                                                                                                                                                                                                                       |
| 45 | Research ethics approval        | 24  | Plans for seeking research ethics committee/institutional review board (REC/IRB) approval                                                                                                                                                                                                                                             |
| 46 |                                 |     |                                                                                                                                                                                                                                                                                                                                       |
| 47 |                                 |     |                                                                                                                                                                                                                                                                                                                                       |
| 48 | Protocol amendments             | 25  | Plans for communicating important protocol modifications (eg, changes to eligibility criteria, outcomes, analyses) to relevant parties (eg, investigators, REC/IRBs, trial participants, trial registries, journals, regulators)                                                                                                      |
| 49 |                                 |     |                                                                                                                                                                                                                                                                                                                                       |
| 50 |                                 |     |                                                                                                                                                                                                                                                                                                                                       |
| 51 |                                 |     |                                                                                                                                                                                                                                                                                                                                       |
| 52 |                                 |     |                                                                                                                                                                                                                                                                                                                                       |
| 53 | Consent or assent               | 26a | Who will obtain informed consent or assent from potential trial participants or authorised surrogates, and how (see Item 32)                                                                                                                                                                                                          |
| 54 |                                 |     |                                                                                                                                                                                                                                                                                                                                       |
| 55 |                                 |     |                                                                                                                                                                                                                                                                                                                                       |
| 56 |                                 |     |                                                                                                                                                                                                                                                                                                                                       |
| 57 |                                 | 26b | Additional consent provisions for collection and use of participant data and biological specimens in ancillary studies, if applicable                                                                                                                                                                                                 |
| 58 |                                 |     |                                                                                                                                                                                                                                                                                                                                       |
| 59 |                                 |     |                                                                                                                                                                                                                                                                                                                                       |
| 60 |                                 |     |                                                                                                                                                                                                                                                                                                                                       |



|                               |     |                                                                                                                                                                                                                                                                                     |                                                                                   |
|-------------------------------|-----|-------------------------------------------------------------------------------------------------------------------------------------------------------------------------------------------------------------------------------------------------------------------------------------|-----------------------------------------------------------------------------------|
| Confidentiality               | 27  | How personal information about potential and enrolled participants will be collected, shared, and maintained in order to protect confidentiality before, during, and after the trial                                                                                                | <input type="checkbox"/>                                                          |
| Declaration of interests      | 28  | Financial and other competing interests for principal investigators for the overall trial and each study site                                                                                                                                                                       | <input type="checkbox"/>                                                          |
| Access to data                | 29  | Statement of who will have access to the final trial dataset, and disclosure of contractual agreements that limit such access for investigators                                                                                                                                     | <input type="checkbox"/><br>Protocol paper<br>Data management<br>* See Note Below |
| Ancillary and post-trial care | 30  | Provisions, if any, for ancillary and post-trial care, and for compensation to those who suffer harm from trial participation                                                                                                                                                       | <input checked="" type="checkbox"/> IRAS<br><br>NHS Insurance<br>* See Note Below |
| Dissemination policy          | 31a | Plans for investigators and sponsor to communicate trial results to participants, healthcare professionals, the public, and other relevant groups (eg, via publication, reporting in results databases, or other data sharing arrangements), including any publication restrictions | <input type="checkbox"/>                                                          |
|                               | 31b | Authorship eligibility guidelines and any intended use of professional writers                                                                                                                                                                                                      | <input checked="" type="checkbox"/> Protocol Paper – ICMJE<br>* See Note Below    |
|                               | 31c | Plans, if any, for granting public access to the full protocol, participant-level dataset, and statistical code                                                                                                                                                                     | <input type="checkbox"/>                                                          |
| <b>Appendices</b>             |     |                                                                                                                                                                                                                                                                                     |                                                                                   |
| Informed consent materials    | 32  | Model consent form and other related documentation given to participants and authorised surrogates                                                                                                                                                                                  | <input type="checkbox"/>                                                          |
| Biological specimens          | 33  | Plans for collection, laboratory evaluation, and storage of biological specimens for genetic or molecular analysis in the current trial and for future use in ancillary studies, if applicable                                                                                      | N/A                                                                               |

\*It is strongly recommended that this checklist be read in conjunction with the SPIRIT 2013 Explanation & Elaboration for important clarification on the items. Amendments to the protocol should be tracked and dated. The SPIRIT checklist is copyrighted by the SPIRIT Group under the Creative Commons "[Attribution-NonCommercial-NoDerivs 3.0 Unported](https://creativecommons.org/licenses/by-nc-nd/3.0/)" license.

1 \*The SRIRIT checklist has been carefully reviewed against the trial protocol and associated  
2 documentation and the explanation of the protocol in the protocol paper submitted.  
3  
4 To provide further explanation on three items where more consideration could be given within the  
5 protocol itself are:  
6

- 7 (i) item 29, refers to a statement of who will have access to the final trial dataset, and  
8 disclosure of contractual agreements that limit such access for investigators. This is an  
9 NIHR funded feasibility trial with no DMEC within its feasibility stage. We do not have  
10 contractual agreements that limit data access, other than to limit access to confidential  
11 information as this is restricted and explained in the participant facing documents. We  
12 have detailed in the protocol paper how data is input, stored, and transferred prior to  
13 analysis to allow for audit and monitoring in accordance with the trial monitoring plan.  
14  
15 (ii) item 30 refers to provisions, if any, for ancillary and post-trial care, and for compensation to  
16 those who suffer harm from trial participation. As this is a psychological therapies trial  
17 there are no biological risks, however we are conscious of the possibility of increased  
18 psychological risks and so we have developed clear safety reporting procedures for  
19 serious adverse events and for urgent safety measures should these arise, which abide by  
20 HRA and UK Research Ethics Committee standard procedures. We have also written  
21 into the protocol procedures for collecting adverse events that do not hit the seriousness  
22 criteria, so that these can be reported in the main outcomes paper. Our research has NHS  
23 insurance and this is clear on the IRAS application document. Any post-trial care would  
24 be standard NHS care;  
25  
26 (iii) item 31b refers to authorship eligibility guidelines and any intended use of professional  
27 writers. We do not use professional writers. We have not written authorship eligibility  
28 into the protocol, however the lead writers for the different papers have been identified  
29 in advance. We have followed the ICMJE recommendations for authorship and have  
30 noted this in the contributors section of the protocol paper.  
31  
32  
33  
34  
35  
36

37 All other items of the SPIRIT checklist are available within the protocol and Research Ethics  
38 Committee approved participant facing documents as appropriate.  
39  
40  
41  
42  
43  
44  
45  
46  
47  
48  
49  
50  
51  
52  
53  
54  
55  
56  
57  
58  
59  
60

CONSORT Abstract Checklist (Clarke et al 2008).

The Abstract has been reviewed in accordance with the CONSORT Abstract Checklist and is in adherence, see below. As this is a protocol paper of a trial open and in its very early stages of data collection, no results are currently available. The MUSE ARMS Feasibility Trial opened to participants on 14.04.2023.

| Item                       | Description                                                                                                 |   |
|----------------------------|-------------------------------------------------------------------------------------------------------------|---|
| Title                      | Identification of the study as randomised                                                                   | ✓ |
| Authors*                   | Contact details for the corresponding author                                                                | ✓ |
| Trial design               | Description of the trial design (eg, parallel, cluster, non-inferiority)                                    | ✓ |
| <b>Methods</b>             |                                                                                                             |   |
| Participants               | Eligibility criteria for participants and the settings where the data were collected                        | ✓ |
| Interventions              | Interventions intended for each group                                                                       | ✓ |
| Objective                  | Specific objective or hypothesis                                                                            | ✓ |
| Outcome                    | Clearly defined primary outcome for this report                                                             | ✓ |
| Randomisation              | How participants were allocated to interventions                                                            | ✓ |
| Blinding (masking)         | Whether or not participants, care givers, and those assessing the outcomes were blinded to group assignment | ✓ |
| <b>Results</b>             |                                                                                                             |   |
| Numbers randomised         | Number of participants randomised to each group                                                             |   |
| Recruitment                | Trial status                                                                                                |   |
| Numbers analysed           | Number of participants analysed in each group                                                               |   |
| Outcome                    | For the primary outcome, a result for each group and the estimated effect size and its precision            |   |
| Harms                      | Important adverse events or side-effects                                                                    |   |
| Conclusions                | General interpretation of the results                                                                       |   |
| Trial registration         | Registration number and name of trial register                                                              | ✓ |
| Funding                    | Source of funding                                                                                           | ✓ |
| *For conference abstracts. |                                                                                                             |   |

Reference:

**CONSORT for reporting randomised trials in journal and conference abstracts**

Clarke, Mike; Moher, David; Wager, Elizabeth; Middleton, Philippa; Altman, Douglas G; Schulz, Kenneth F  
*The Lancet*; Jan 26-Feb 1, 2008; 371, 9609; ProQuest  
 pg. 281
