# Supplementary material for: Use of a targeted, computer/web-based guided self-help psychoeducation toolkit for distressing hallucinations (MUSE) in people with an at-risk mental state for psychosis: protocol for a randomised controlled feasibility trial
Source: PubMed Central journal article supplement (PMC10314705; doi:10.1136/bmjopen-2023-076101), 2023-06-30
Supplement: bmjopen-2023-076101.reviewer_comments.pdf [file bmjopen-2023-076101.reviewer_comments.pdf]

## PEER REVIEW HISTORY

BMJ Open publishes all reviews undertaken for accepted manuscripts. Reviewers are asked to complete a checklist review form (<http://bmjopen.bmj.com/site/about/resources/checklist.pdf>) and are provided with free text boxes to elaborate on their assessment. These free text comments are reproduced below.

## ARTICLE DETAILS

|                            |                                                                                                                                                                                                                                                       |
|----------------------------|-------------------------------------------------------------------------------------------------------------------------------------------------------------------------------------------------------------------------------------------------------|
| <b>TITLE (PROVISIONAL)</b> | Use of a targeted, computer/web-based guided self-help psychoeducation toolkit for distressing hallucinations (MUSE) in people with an At Risk Mental State for psychosis: protocol for a randomised controlled feasibility trial                     |
| <b>AUTHORS</b>             | Hamilton, Jahnese; Arnott, Bronia; Aynsworth, Charlotte; Barclay, Nicola; Birkett, Lauren; Brandon, Toby; Dixon, Lyndsey; Dudley, Robert; Einbeck, J; Gibbs, Christopher; Kharatikoopaei, Ehsan; Simpson, Jennifer; Dodgson, Guy; Fernyhough, Charles |

This article was not externally reviewed at BMJ Open. Protocols that have been independently assessed prior to submission to BMJ Open are usually fast-tracked to publication on the grounds that further substantial changes will not be possible. This independent assessment will usually be external, independent review for both a substantial grant award from a non-commercial or government funder and ethics approval.
