# Supplementary material for: Use of a targeted, computer/web-based guided self-help psychoeducation toolkit for distressing hallucinations (MUSE) in people with an at-risk mental state for psychosis: protocol for a randomised controlled feasibility trial
Source: PubMed Central journal article supplement (PMC10314705; doi:10.1136/bmjopen-2023-076101), 2023-06-30
Supplement: bmjopen-2023-076101supp001.pdf [file bmjopen-2023-076101supp001.pdf]

MUSE ARMS Feasibility Trial: Preferences Questionnaire; v1.0, 12.03.2023

IRAS Project ID: 323903

### Preferences for psychological therapy or support

This set of questions is seeking to develop an understanding of your preferences for therapy treatment.

1. Do you have a preference for the number of therapy sessions you might get?

- 1-3
- 4-8
- 9-16
- 17-30
- Don't know

2. How important is it that your treatment:

Includes being give medication?

- Not important
- Somewhat important
- Very important

Includes a talking therapy?

- Not important
- Somewhat important
- Very important

Addresses any feelings of anxiety?

- Not important
- Somewhat important
- Very important

*MUSE ARMS Feasibility Trial: Preferences Questionnaire; v1.0, 12.03.2023*  
*IRAS Project ID: 323903*

Addresses any feeling of low mood?

- Not important
- Somewhat important
- Very important

Helps you understand the causes of any unusual sensory experiences, such as hearing a voice?

- Not important
- Somewhat important
- Very important

Helps you learn to manage any unusual sensory experiences?

- Not important
- Somewhat important
- Very important

Helps you feel less distressed about any unusual sensory experiences?

- Not important
- Somewhat important
- Very important

3. What are your preferences for the way the therapist/clinical care team works with you?  
Please rate how important you think the following statements are:

I am given space to talk and feel heard

- Not important
- Somewhat important
- Very important

*MUSE ARMS Feasibility Trial: Preferences Questionnaire; v1.0, 12.03.2023*  
*IRAS Project ID: 323903*

I work with my therapist to help me make sense of my experiences

- Not important
- Somewhat important
- Very important

I am involved in setting my own goals

- Not important
- Somewhat important
- Very important

I am given new ideas of how to cope with my experiences

- Not important
- Somewhat important
- Very important

4. How much do you hope to get the MUSE therapy?

- I would prefer to be allocated to MUSE based therapy
- I don't mind one way or the other whether I receive MUSE based therapy
- I would prefer to be allocated to the treatment as usual.
