# Supplementary material for: Use of a targeted, computer/web-based guided self-help psychoeducation toolkit for distressing hallucinations (MUSE) in people with an at-risk mental state for psychosis: protocol for a randomised controlled feasibility trial
Source: PubMed Central journal article supplement (PMC10314705; doi:10.1136/bmjopen-2023-076101), 2023-06-30
Supplement: bmjopen-2023-076101supp002.pdf [file bmjopen-2023-076101supp002.pdf]

**MUSE Therapist Pack**

Version 1.0; Date: 02.03.2023

MUSE ARMS Feasibility Trial; IRAS ID: 323903



# MUSE THERAPY THERAPIST PACK



\*Return to research site file for archiving after completion

MUSE Therapist Pack

Version 1.0; Date: 02.03.2023

MUSE ARMS Feasibility Trial; IRAS ID: 323903

**Adherence Checklist: MUSE Therapy Sessions**  
(Please tick topic used in any session)

|                                            |           |           |           |           |           |           |           |           |                 |  |
|--------------------------------------------|-----------|-----------|-----------|-----------|-----------|-----------|-----------|-----------|-----------------|--|
| <b>Insert Date:</b>                        |           |           |           |           |           |           |           |           |                 |  |
| <b>Insert length of session (minutes):</b> |           |           |           |           |           |           |           |           |                 |  |
| <b>Module/Topic</b>                        | <b>S1</b> | <b>S2</b> | <b>S3</b> | <b>S4</b> | <b>S5</b> | <b>S6</b> | <b>S7</b> | <b>S8</b> | <b>Comments</b> |  |
| <b><u>What are voices?</u></b>             |           |           |           |           |           |           |           |           |                 |  |
| What are voices?                           |           |           |           |           |           |           |           |           |                 |  |
| How many people hear voices?               |           |           |           |           |           |           |           |           |                 |  |
| Why does it become a problem?              |           |           |           |           |           |           |           |           |                 |  |
| Can things get better?                     |           |           |           |           |           |           |           |           |                 |  |
| Personal experiences                       |           |           |           |           |           |           |           |           |                 |  |
| <b>1. <u>How the mind works?</u></b>       |           |           |           |           |           |           |           |           |                 |  |
| Thoughts and senses                        |           |           |           |           |           |           |           |           |                 |  |
| How thoughts work                          |           |           |           |           |           |           |           |           |                 |  |
| Embarrassing thoughts                      |           |           |           |           |           |           |           |           |                 |  |
| The power of attention                     |           |           |           |           |           |           |           |           |                 |  |
| How we use expectation                     |           |           |           |           |           |           |           |           |                 |  |
| <b>2. <u>Assessment</u></b>                |           |           |           |           |           |           |           |           |                 |  |
| Types of unusual sensory experiences.      |           |           |           |           |           |           |           |           |                 |  |
| What kind of voices do we hear?            |           |           |           |           |           |           |           |           |                 |  |
| <b>3. <u>Inner Speech</u></b>              |           |           |           |           |           |           |           |           |                 |  |
| What is inner speech?                      |           |           |           |           |           |           |           |           |                 |  |
| Our inner speech can do amazing things     |           |           |           |           |           |           |           |           |                 |  |
| Why do people not recognise voices?        |           |           |           |           |           |           |           |           |                 |  |
| Thoughts are hard to control               |           |           |           |           |           |           |           |           |                 |  |
| Blocking the loop                          |           |           |           |           |           |           |           |           |                 |  |
| Inner speech – what is the evidence?       |           |           |           |           |           |           |           |           |                 |  |
| Tracking the self – Was that me?           |           |           |           |           |           |           |           |           |                 |  |
| Writers and voice hearing                  |           |           |           |           |           |           |           |           |                 |  |
| Imaginary friends                          |           |           |           |           |           |           |           |           |                 |  |
| Formulation                                |           |           |           |           |           |           |           |           |                 |  |
| Voices and Relationships                   |           |           |           |           |           |           |           |           |                 |  |
| Transforming the voice                     |           |           |           |           |           |           |           |           |                 |  |
| Testing out your explanations              |           |           |           |           |           |           |           |           |                 |  |

**Completed by**

|                                  |             |       |            |                           |
|----------------------------------|-------------|-------|------------|---------------------------|
| Participant ID (MUSE ID Number): | Print Name: | Role: | Signature: | Completed on (DD/MM/YYYY) |
|----------------------------------|-------------|-------|------------|---------------------------|



MUSE Therapist Pack

Version 1.0; Date: 02.03.2023

MUSE ARMS Feasibility Trial; IRAS ID: 323903

**Adverse Events Checklist**

| Insert date:                                                    |    |    |    |    |    |    |    |    |          |
|-----------------------------------------------------------------|----|----|----|----|----|----|----|----|----------|
|                                                                 | S1 | S2 | S3 | S4 | S5 | S6 | S7 | S8 | Comments |
| Adverse events of interest reported?<br><b>Add to Rio/Paris</b> |    |    |    |    |    |    |    |    |          |
| Serious Adverse Event? <b>NB 24hour reporting deadline</b>      |    |    |    |    |    |    |    |    |          |
| Urgent Safety Measures? <b>NB Phone PI immediately</b>          |    |    |    |    |    |    |    |    |          |

**Adverse Events Guidance:**

**Adverse Events.** Record on Rio/Paris for collection by the Unblinded Researcher at the 12wk and 20wk assessment time points that pertain to the following events of Protocol Interest:

- Clinically significant increases in distress and/or psychosis
- Increased harm to self/harm to others
- Increased suicidal ideation/attempts
- Increased use of drugs/alcohol
- Emergency room visits for mental health concerns
- Access to crises services

**Serious Adverse Event (SAE):** The site Principal Investigator (PI), or delegate shall report all SAEs within 24 hours of becoming aware of the event to the Chief Investigator (CI), or delegate via email to [MUSE.ARMS@cntw.nhs.uk](mailto:MUSE.ARMS@cntw.nhs.uk) using the SAE reporting form. These are events that:

- results in death;
- is life-threatening;
- requires hospitalisation or prolongation of existing hospitalisation;
- results in persistent or significant disability or incapacity;
- consists of a congenital anomaly or birth defect; or,
- is otherwise considered medically significant by the investigator.

**Urgent Safety Measures:** The site Principal Investigator (PI), or delegate, must inform the CI immediately by telephone (Tel. 01670844670 / alternatively Teams video/voice call for [guy.dodgson@cntw.nhs.uk](mailto:guy.dodgson@cntw.nhs.uk)) of urgent safety measures defined above in section 11.5 (early withdrawal/changes to procedure due to safety concerns for staff or participants). This information shall be documented on the Urgent safety reporting form and submitted by email to [MUSE.ARMS@cntw.nhs.uk](mailto:MUSE.ARMS@cntw.nhs.uk). This is when the following applies:

- Early withdrawal of participant(s) due to safety concerns about the intervention or assessments
- Changes to procedures due to concerns about staff or participant safety

**Transition to Psychosis Checklist**

| Insert date:                                                           |    |    |    |    |    |    |    |    |          |
|------------------------------------------------------------------------|----|----|----|----|----|----|----|----|----------|
|                                                                        | S1 | S2 | S3 | S4 | S5 | S6 | S7 | S8 | Comments |
| Indication of Transition to Psychosis?<br><b>Add note to Rio/Paris</b> |    |    |    |    |    |    |    |    |          |

**Transition to Psychosis Guidance:** The following information suggests potential transition to psychosis for this protocol:

- Clinical diagnosis using standard diagnostic classification systems DSM/ICD
- Clinical diagnosis using ARMS assessment schedule documented in clinical notes
- Transfer to the Early Intervention in Psychosis pathway
- Treated or untreated psychotic episode of one week's duration or longer
- Initiation of treatment with antipsychotics (3 or more weeks of treatment with antipsychotics at a dose of  $\geq 5$ mg haloperidol or equivalent)

**Completed by**

| Participant ID (MUSE ID Number): | Print Name: | Role: | Signature: | Completed on (DD/MM/YYYY) |
|----------------------------------|-------------|-------|------------|---------------------------|
|                                  |             |       |            |                           |
