# Supplementary material for: Use of a targeted, computer/web-based guided self-help psychoeducation toolkit for distressing hallucinations (MUSE) in people with an at-risk mental state for psychosis: protocol for a randomised controlled feasibility trial
Source: PubMed Central journal article supplement (PMC10314705; doi:10.1136/bmjopen-2023-076101), 2023-06-30
Supplement: bmjopen-2023-076101supp003.pdf [file bmjopen-2023-076101supp003.pdf]

**TAU Therapist Pack**

Version 1.0; Date: 02.03.2023

MUSE ARMS Feasibility Trial; IRAS ID: 323903



# TAU THERAPY THERAPIST PACK



\*Return to research site file for archiving after completion

TAU Therapist Pack

Version 1.0; Date: 02.03.2023

MUSE ARMS Feasibility Trial; IRAS ID: 323903

**Adherence Checklist: TAU Therapy Sessions**  
**(Please tick for used in any session)**

|                                                                                                                    |    |    |    |    |    |    |    |    |          |
|--------------------------------------------------------------------------------------------------------------------|----|----|----|----|----|----|----|----|----------|
| Insert Date:                                                                                                       |    |    |    |    |    |    |    |    |          |
| Insert length of session (minutes):                                                                                |    |    |    |    |    |    |    |    |          |
|                                                                                                                    | S1 | S2 | S3 | S4 | S5 | S6 | S7 | S8 | Comments |
| Was this a CBT session (Y/N)?                                                                                      |    |    |    |    |    |    |    |    |          |
| CBT Assessment                                                                                                     |    |    |    |    |    |    |    |    |          |
| Formulation                                                                                                        |    |    |    |    |    |    |    |    |          |
| Needs based emotional support                                                                                      |    |    |    |    |    |    |    |    |          |
| Social Support                                                                                                     |    |    |    |    |    |    |    |    |          |
| Normalisation                                                                                                      |    |    |    |    |    |    |    |    |          |
| Stress management                                                                                                  |    |    |    |    |    |    |    |    |          |
| Psychoeducation*<br><i>*Please describe if related to managing unusual sensory experiences in the comments box</i> |    |    |    |    |    |    |    |    |          |
| Other:                                                                                                             |    |    |    |    |    |    |    |    |          |
| Other:                                                                                                             |    |    |    |    |    |    |    |    |          |
| Other:                                                                                                             |    |    |    |    |    |    |    |    |          |

**Completed by**

|                                  |             |       |            |                           |
|----------------------------------|-------------|-------|------------|---------------------------|
| Participant ID (MUSE ID Number): | Print Name: | Role: | Signature: | Completed on (DD/MM/YYYY) |
|----------------------------------|-------------|-------|------------|---------------------------|

TAU Therapist Pack

Version 1.0; Date: 02.03.2023

MUSE ARMS Feasibility Trial; IRAS ID: 323903

### Adverse Events Checklist

| Insert date:                                                    |    |    |    |    |    |    |    |    |          |
|-----------------------------------------------------------------|----|----|----|----|----|----|----|----|----------|
|                                                                 | S1 | S2 | S3 | S4 | S5 | S6 | S7 | S8 | Comments |
| Adverse events of interest reported?<br><b>Add to Rio/Paris</b> |    |    |    |    |    |    |    |    |          |
| Serious Adverse Event? <b>NB 24hour reporting deadline</b>      |    |    |    |    |    |    |    |    |          |
| Urgent Safety Measures? <b>NB Phone PI immediately</b>          |    |    |    |    |    |    |    |    |          |

Adverse Events Guidance:

**Adverse Events. Record on Rio/Paris for collection by the Unblinded Researcher at the 12wk and 20wk assessment time points that pertain to the following events of Protocol Interest:**

- Clinically significant increases in distress and/or psychosis
- Increased harm to self/harm to others
- Increased suicidal ideation/attempts
- Increased use of drugs/alcohol
- Emergency room visits for mental health concerns
- Access to crises services

**Serious Adverse Event (SAE): The site Principal Investigator (PI), or delegate shall report all SAEs within 24 hours of becoming aware of the event to the Chief Investigator (CI), or delegate via email to [MUSE.ARMS@cntw.nhs.uk](mailto:MUSE.ARMS@cntw.nhs.uk) using the SAE reporting form. These are events that:**

- results in death;
- is life-threatening;
- requires hospitalisation or prolongation of existing hospitalisation;
- results in persistent or significant disability or incapacity;
- consists of a congenital anomaly or birth defect; or,
- is otherwise considered medically significant by the investigator.

**Urgent Safety Measures: The site Principal Investigator (PI), or delegate, must inform the CI immediately by telephone (Tel. 01670844670 / alternatively Teams video/voice call for [guy.dodgson@cntw.nhs.uk](mailto:guy.dodgson@cntw.nhs.uk)) of urgent safety measures defined above in section 11.5 (early withdrawal/changes to procedure due to safety concerns for staff or participants). This information shall be documented on the Urgent safety reporting form and submitted by email to [MUSE.ARMS@cntw.nhs.uk](mailto:MUSE.ARMS@cntw.nhs.uk). This is when the following applies:**

- Early withdrawal of participant(s) due to safety concerns about the intervention or assessments
- Changes to procedures due to concerns about staff or participant safety

### Transition to Psychosis Checklist

| Insert date:                                                           |    |    |    |    |    |    |    |    |          |
|------------------------------------------------------------------------|----|----|----|----|----|----|----|----|----------|
|                                                                        | S1 | S2 | S3 | S4 | S5 | S6 | S7 | S8 | Comments |
| Indication of Transition to Psychosis?<br><b>Add note to Rio/Paris</b> |    |    |    |    |    |    |    |    |          |

Transition to Psychosis Guidance: The following information suggests potential transition to psychosis for this protocol:

- Clinical diagnosis using standard diagnostic classification systems DSM/ICD
- Clinical diagnosis using ARMS assessment schedule documented in clinical notes
- Transfer to the Early Intervention in Psychosis pathway
- Treated or untreated psychotic episode of one week's duration or longer
- Initiation of treatment with antipsychotics (3 or more weeks of treatment with antipsychotics at a dose of  $\geq 5$ mg haloperidol or equivalent)

#### Completed by

|                                  |             |       |            |                           |
|----------------------------------|-------------|-------|------------|---------------------------|
| Participant ID (MUSE ID Number): | Print Name: | Role: | Signature: | Completed on (DD/MM/YYYY) |
|----------------------------------|-------------|-------|------------|---------------------------|
